# Supplementary material for: Evaluating the Effectiveness of Tethered Bis(urazolyl) Diradicals as Molecular Building Blocks for Dynamic Covalent Chemistry
Source: PubMed Central journal article supplement (PMC10337031; doi:10.1021/acs.joc.3c00732), 2023-06-26
Supplement: jo3c00732_si_001.pdf [file jo3c00732_si_001.pdf]

## Supporting Information

### Evaluating the Effectiveness of Tethered Bis-Urazolyl Diradicals as Molecular Building Blocks for Dynamic Covalent Chemistry

Gary W. Breton<sup>1\*</sup>, Kenneth L. Martin<sup>1</sup>, James Alexander Bowron, Jr.<sup>1</sup>, and John Bacsá<sup>2</sup>

<sup>1</sup>*Department of Chemistry, Berry College, Mount Berry, GA, 30149 USA*

<sup>2</sup>*Department of Chemistry, Emory University, Atlanta, GA, 30322 USA*

\*Corresponding Author: [gbreton@berry.edu](mailto:gbreton@berry.edu)

#### Table of Contents

|                                                                                                                                                                          |         |
|--------------------------------------------------------------------------------------------------------------------------------------------------------------------------|---------|
| <sup>1</sup> H and <sup>13</sup> C NMR Spectra of Relevant Compounds.....                                                                                                | S2–S20  |
| DOSY Spectra.....                                                                                                                                                        | S21–S22 |
| <sup>1</sup> H NMR Spectra Used to Determine the Temperature Dependence of the Equilibrium Between Monomer <b>4c<sub>1</sub></b> and Dimer <b>4c<sub>2</sub></b> .....   | S23–S25 |
| <sup>1</sup> H NMR Spectra Used to Determine the Concentration Dependence of the Equilibrium Between Monomer <b>4c<sub>1</sub></b> and Dimer <b>4c<sub>2</sub></b> ..... | S26–S29 |
| Computational Details for Optimized Structures.....                                                                                                                      | S30–S35 |
| Crystal Structure Data.....                                                                                                                                              | S36–S86 |

### <sup>1</sup>H NMR Spectrum of Compound 6 (DMSO-d<sub>6</sub>, 400 MHz)

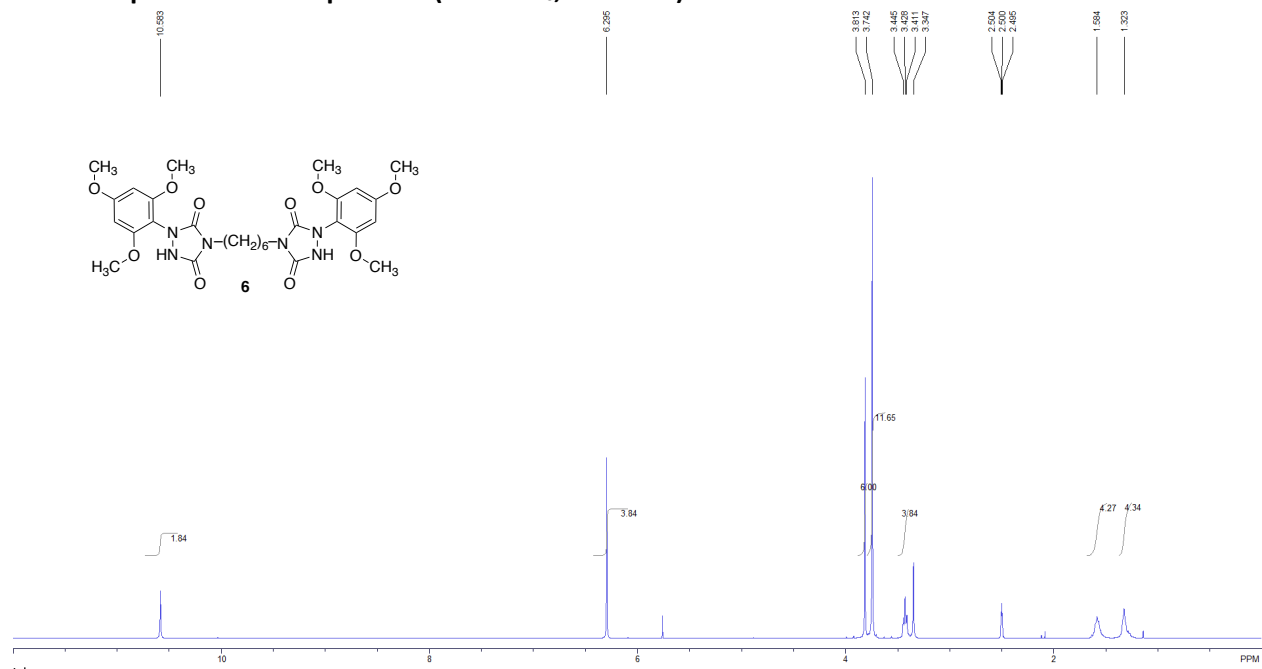

### <sup>13</sup>C{<sup>1</sup>H} NMR Spectrum of Compound 6 (DMSO-d<sub>6</sub>, 100 MHz)

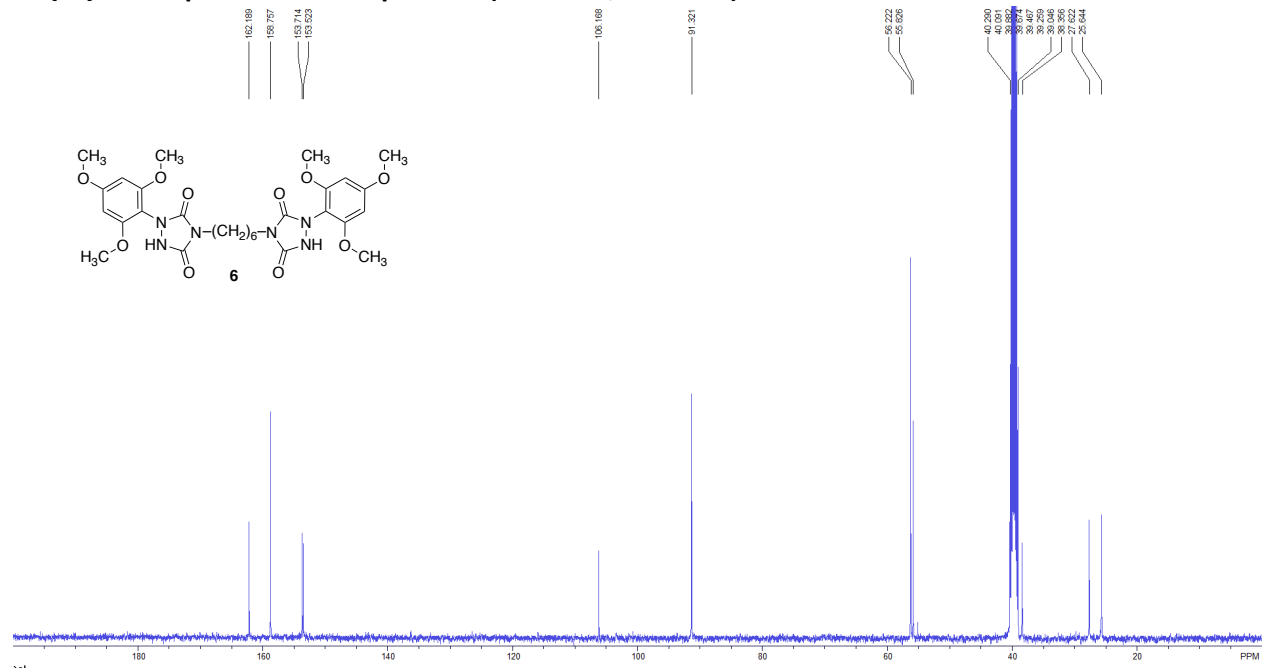

**<sup>1</sup>H NMR Spectrum of Oligomeric Product Resulting from Oxidation of Bisurazole 6 (CDCl<sub>3</sub>, 400 MHz)**

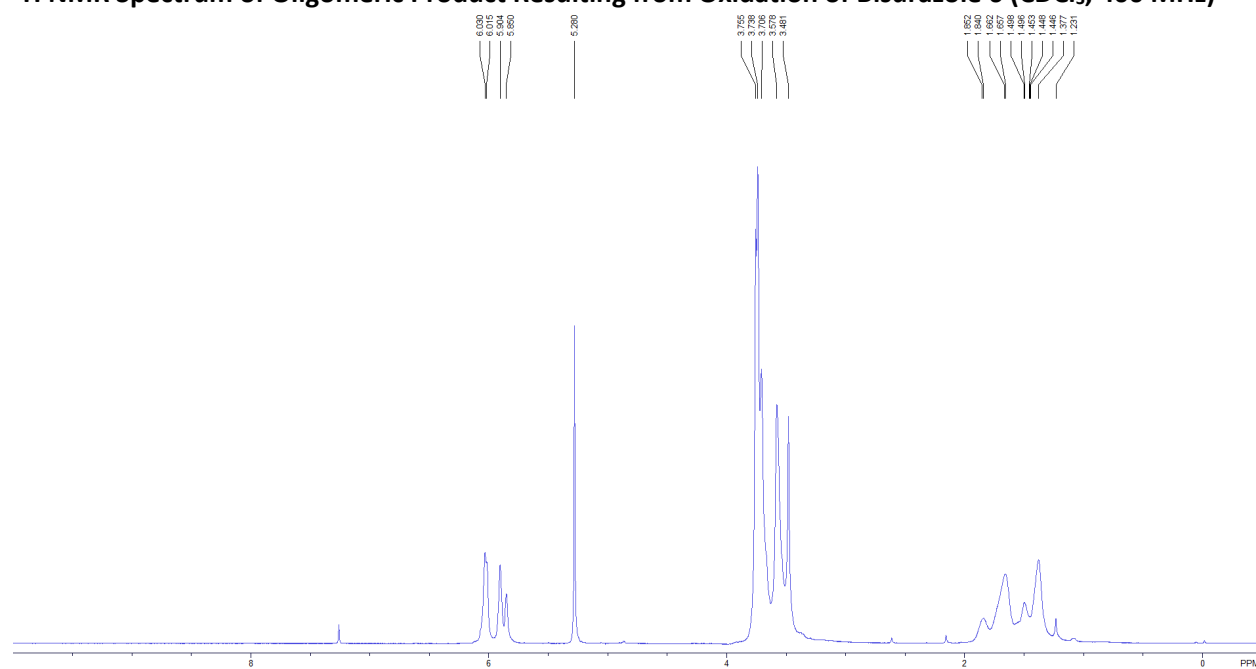

### $^1\text{H}$ NMR Spectrum of Bisurazole **8a** (DMSO- $d_6$ , 400 MHz)

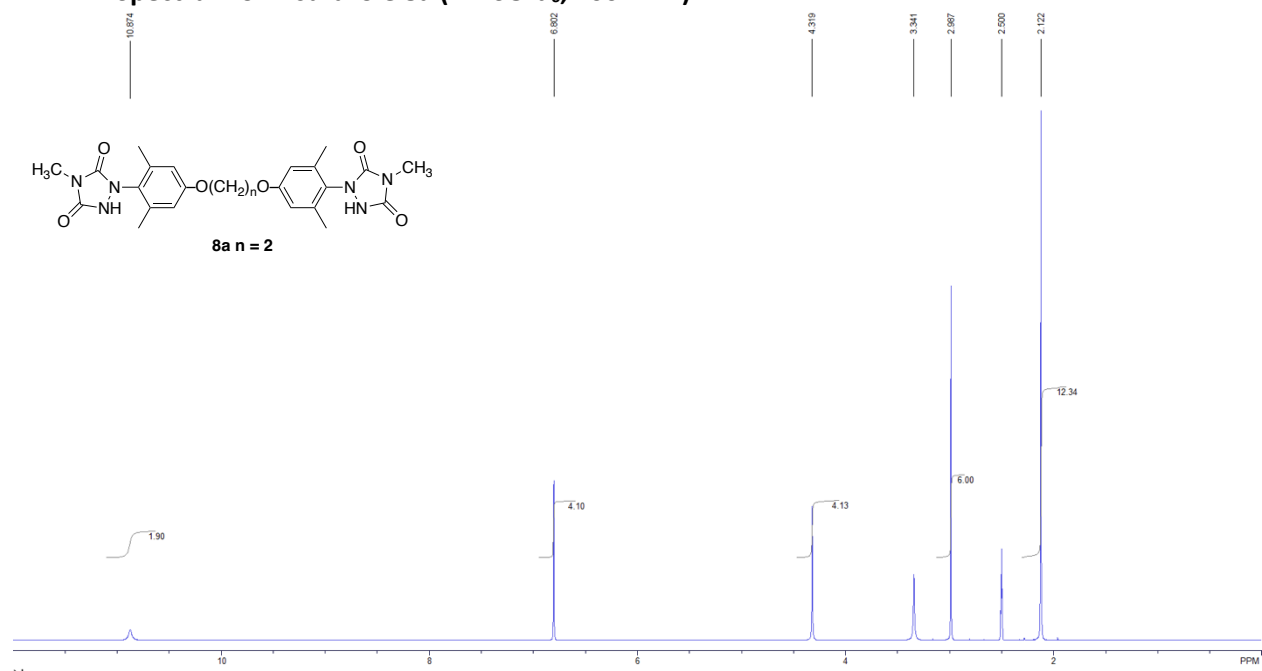

### $^{13}\text{C}\{^1\text{H}\}$ NMR Spectrum of Bisurazole **8a** (DMSO- $d_6$ , 100 MHz)

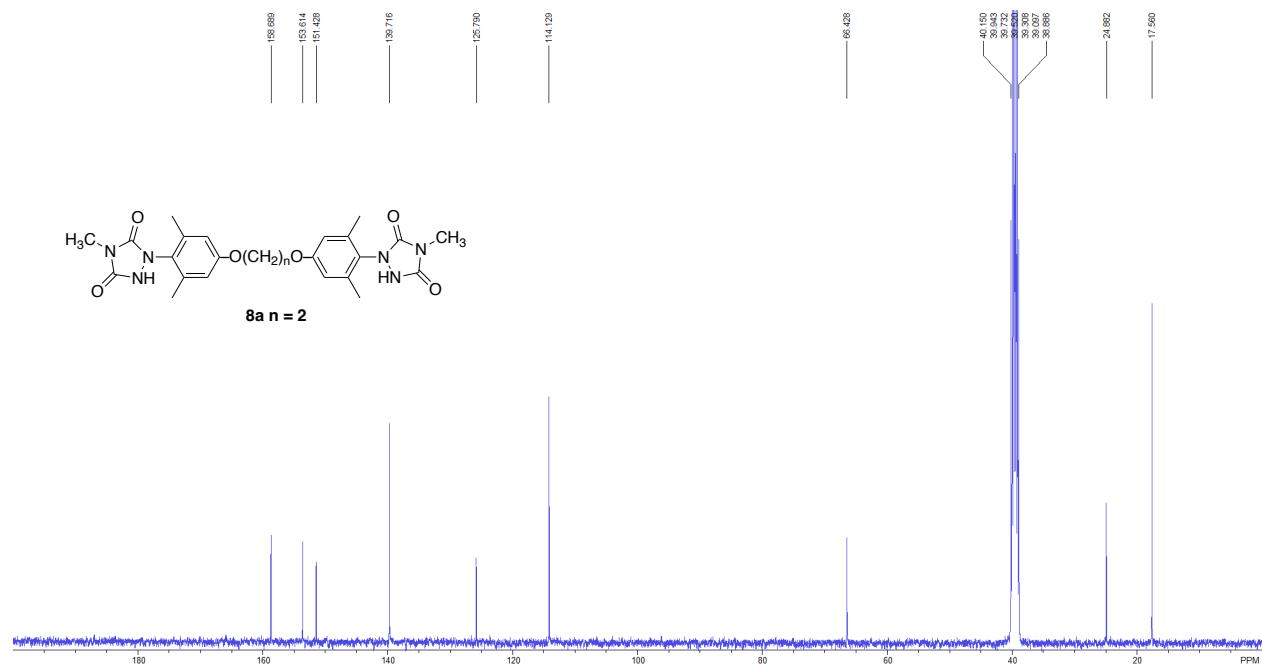

### $^1\text{H}$ NMR Spectrum of Dimer $4a_2$ ( $\text{CDCl}_3$ , 400 MHz)

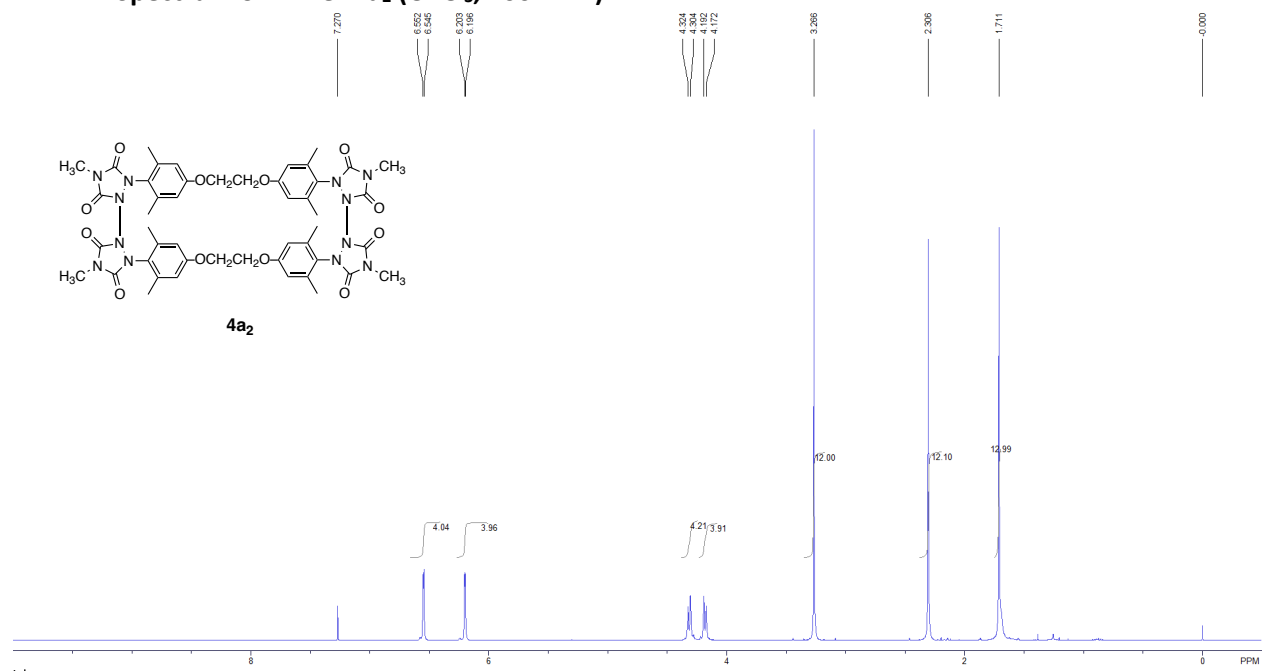

### $^{13}\text{C}\{^1\text{H}\}$ NMR Spectrum of Dimer $4a_2$ ( $\text{CDCl}_3$ , 100 MHz)

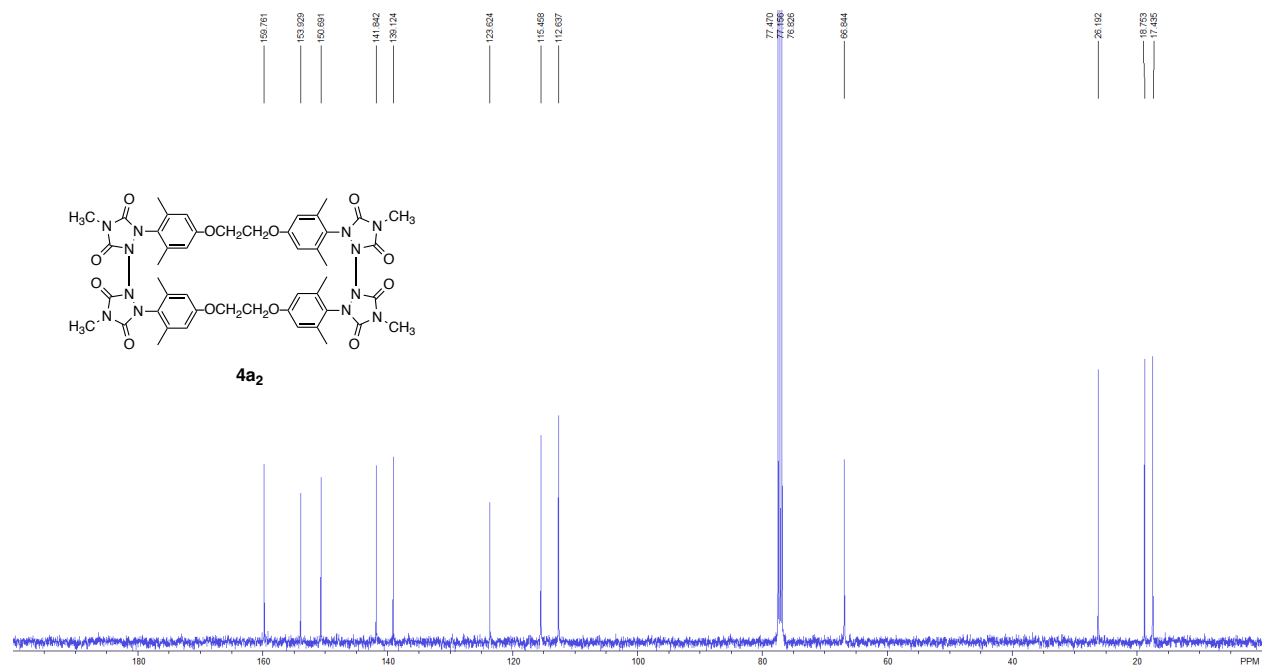

### $^1\text{H}$ NMR Spectrum of Bisurazole 8b (DMSO- $d_6$ , 400 MHz)

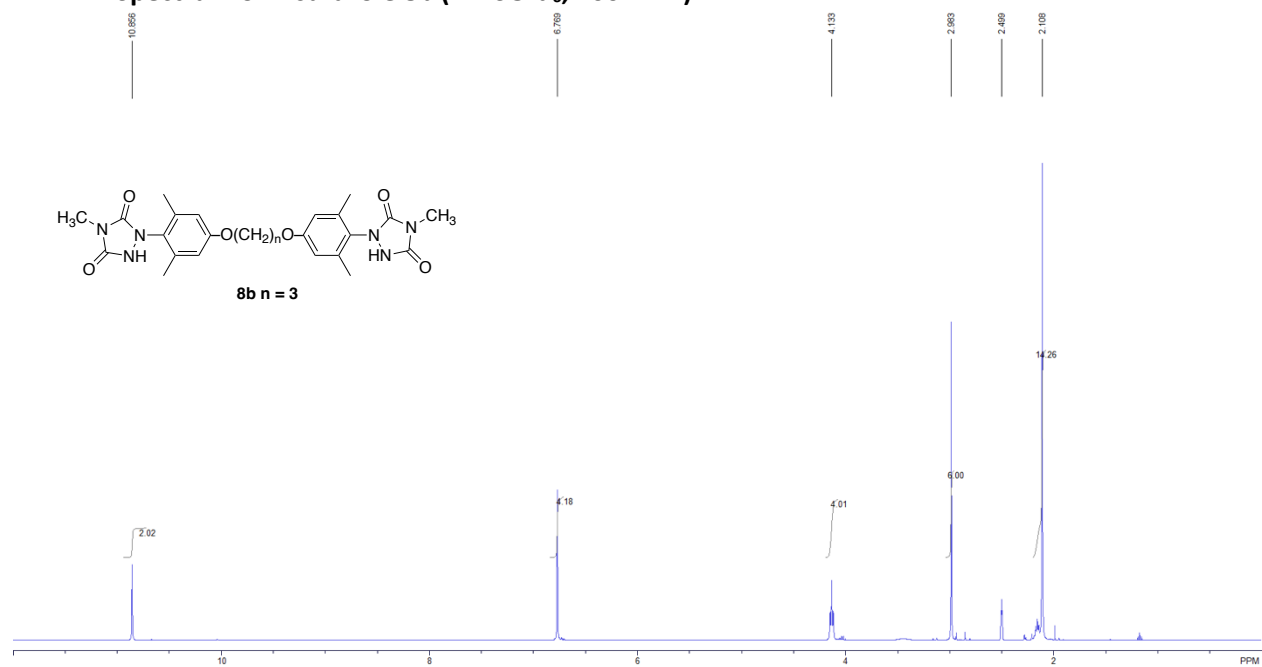

### $^{13}\text{C}\{^1\text{H}\}$ NMR Spectrum of Bisurazole 8b (DMSO- $d_6$ , 100 MHz)

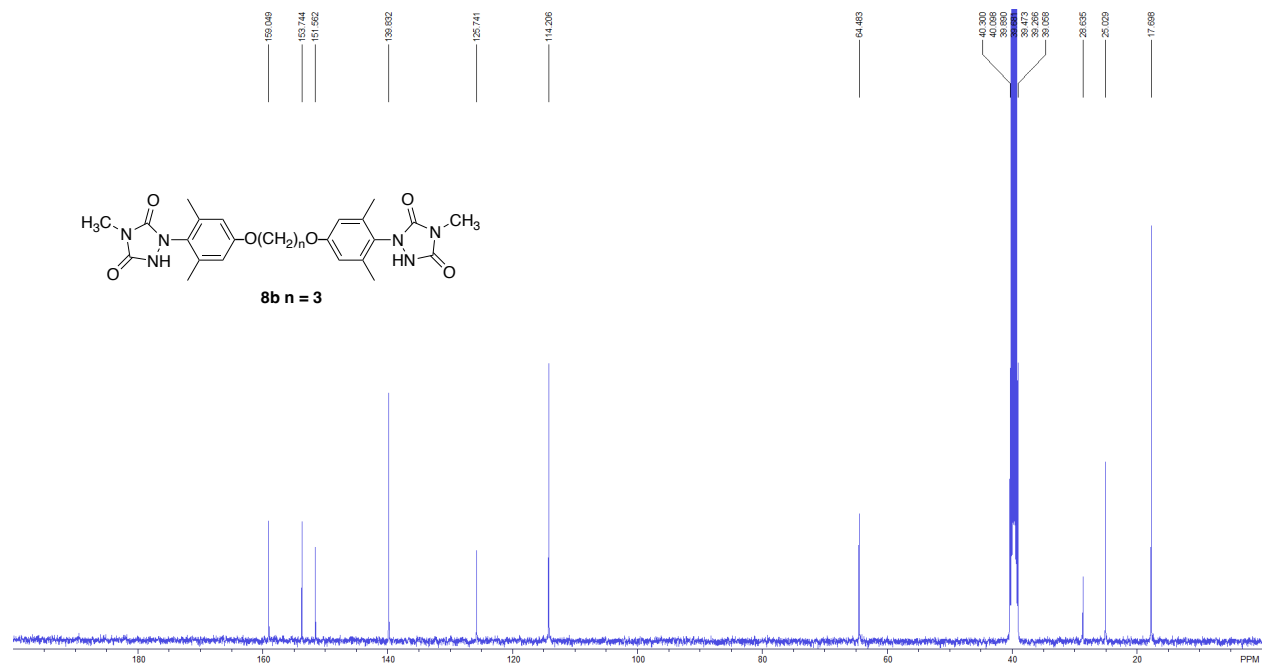

**$^1\text{H}$  NMR Spectrum of Dimer  $4b_2$  ( $\text{CDCl}_3$ , 400 MHz, 25 °C)**

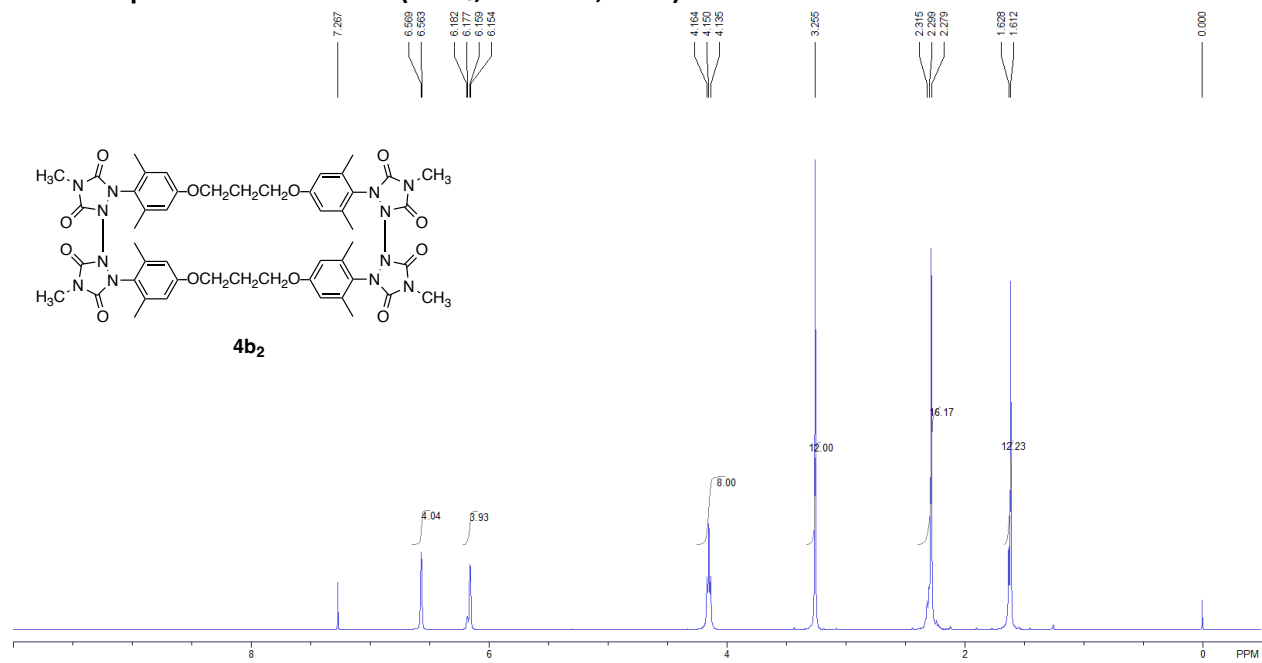

**$^{13}\text{C}\{^1\text{H}\}$  NMR Spectrum of Dimer  $4b_2$  ( $\text{CDCl}_3$ , 100 MHz, 25 °C)**

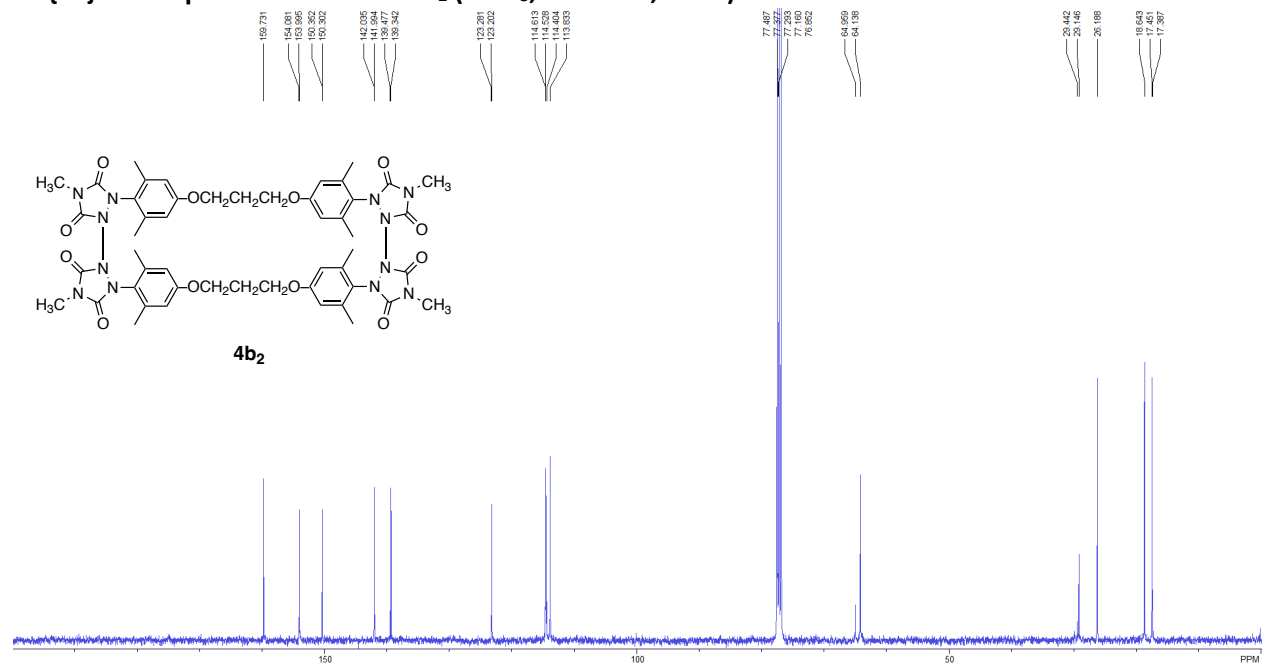

**$^1\text{H}$  NMR Spectrum of Dimer  $4b_2$  ( $\text{CDCl}_3$ , 400 MHz, 60 °C)**

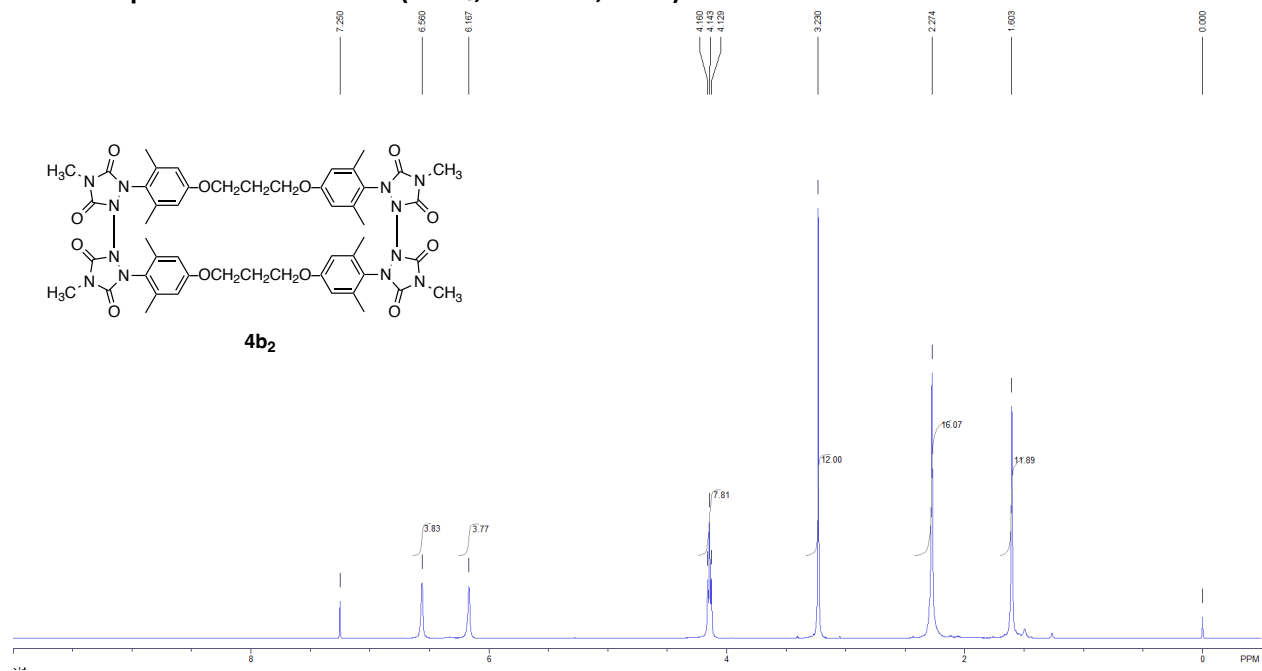

**$^{13}\text{C}\{^1\text{H}\}$  NMR Spectrum of Dimer  $4b_2$  ( $\text{CDCl}_3$ , 100 MHz, 60 °C)**

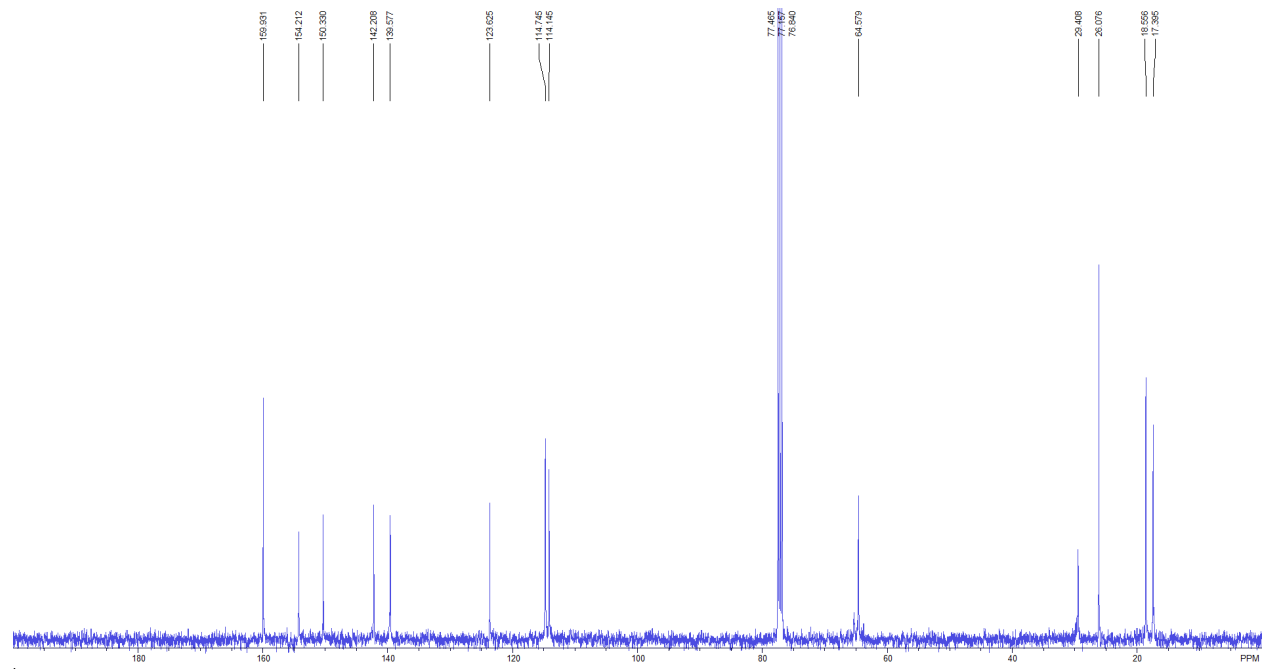



### $^1\text{H}$ NMR Spectrum of Compound 7c ( $\text{CDCl}_3$ , 400 MHz)

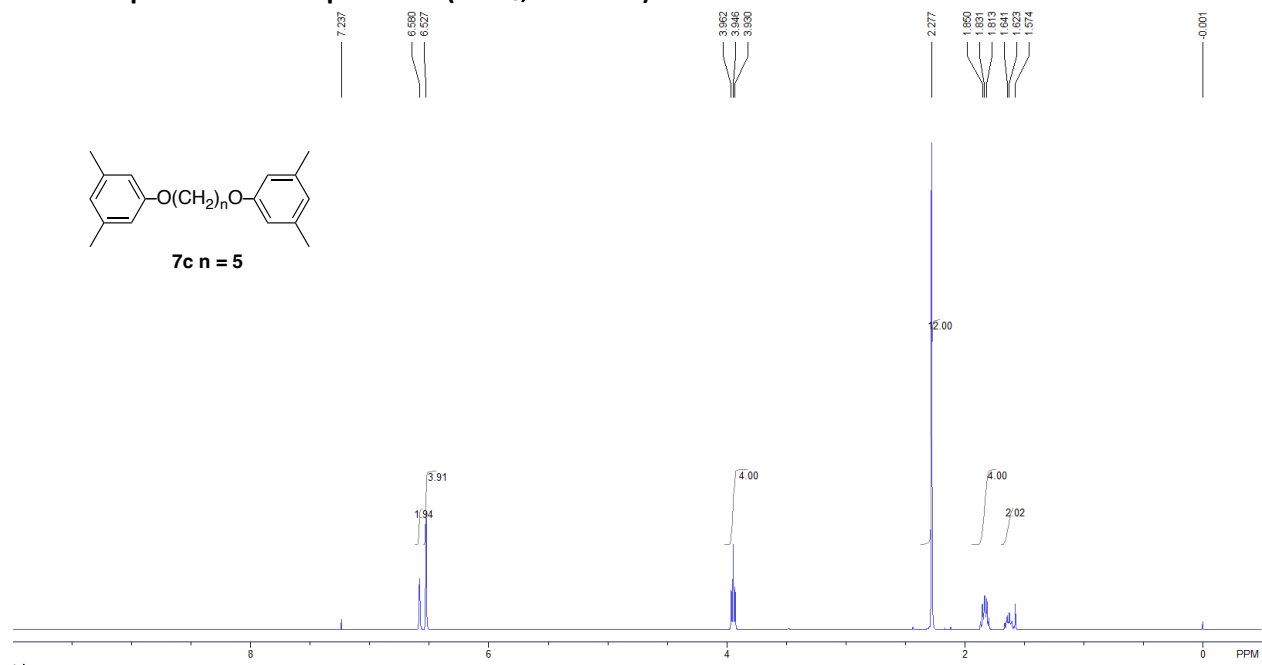

### $^{13}\text{C}\{^1\text{H}\}$ NMR Spectrum of Compound 7c ( $\text{CDCl}_3$ , 100 MHz)

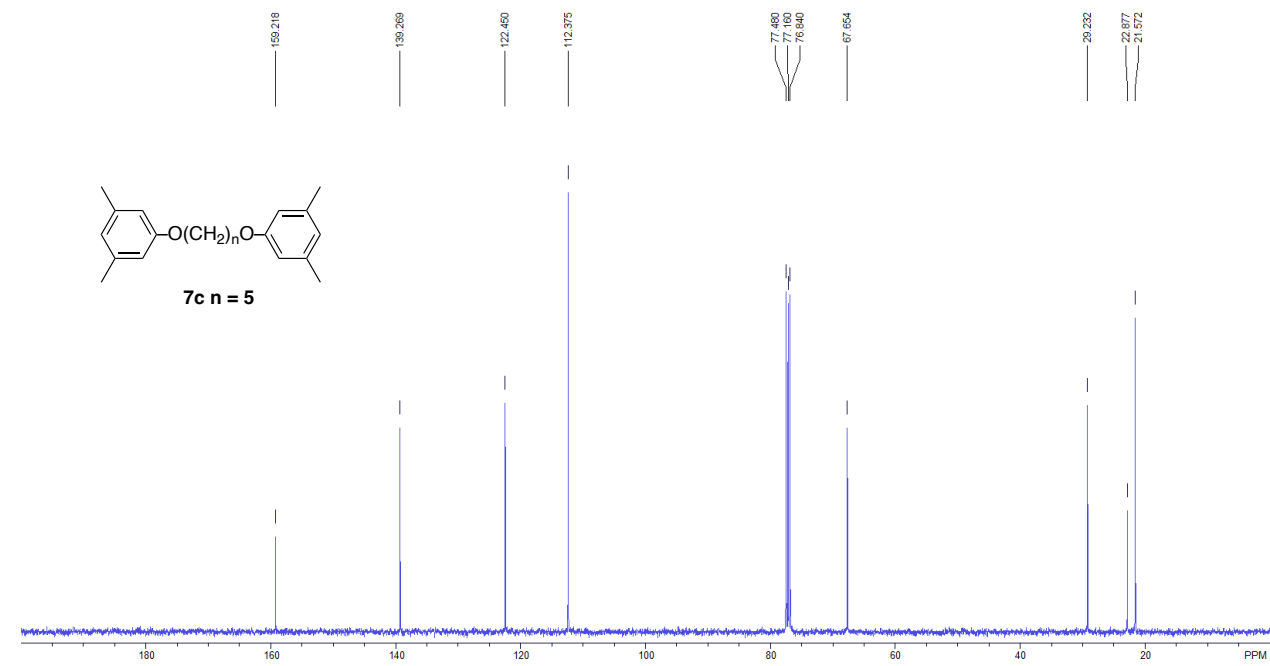

### $^1\text{H}$ NMR Spectrum of Bisurazole **8c** (DMSO- $d_6$ , 400 MHz)

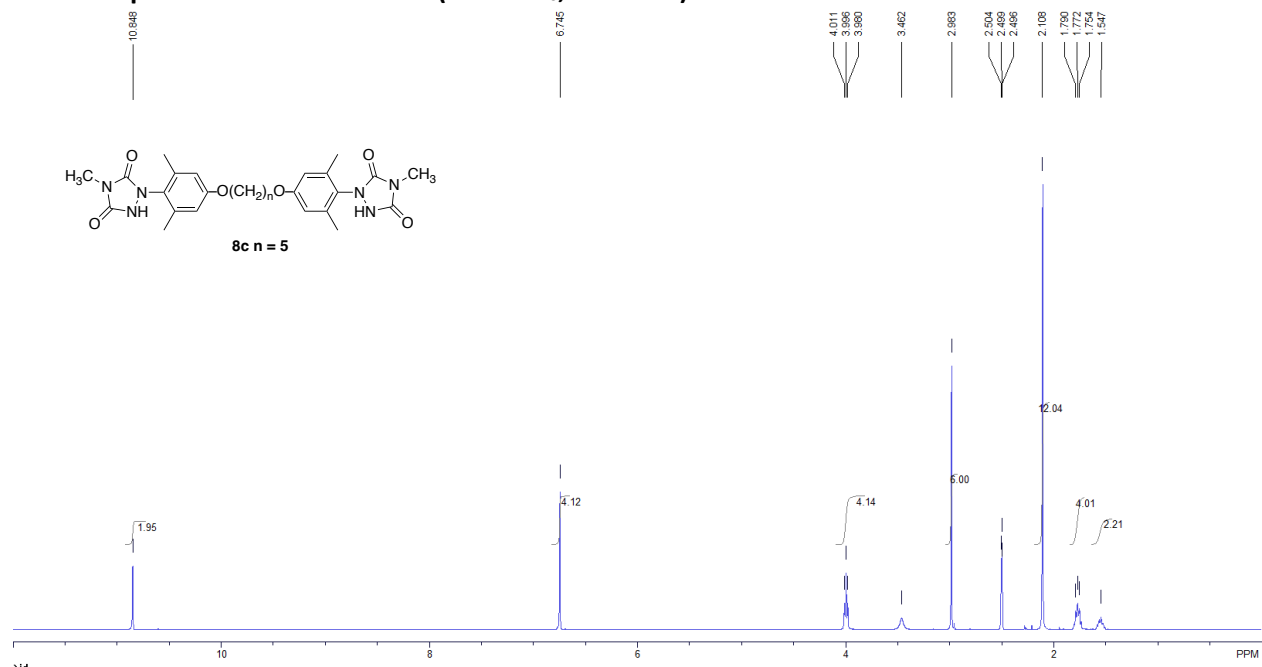

### $^{13}\text{C}\{^1\text{H}\}$ NMR Spectrum of Bisurazole **8c** ( $\text{CDCl}_3$ , 100 MHz)

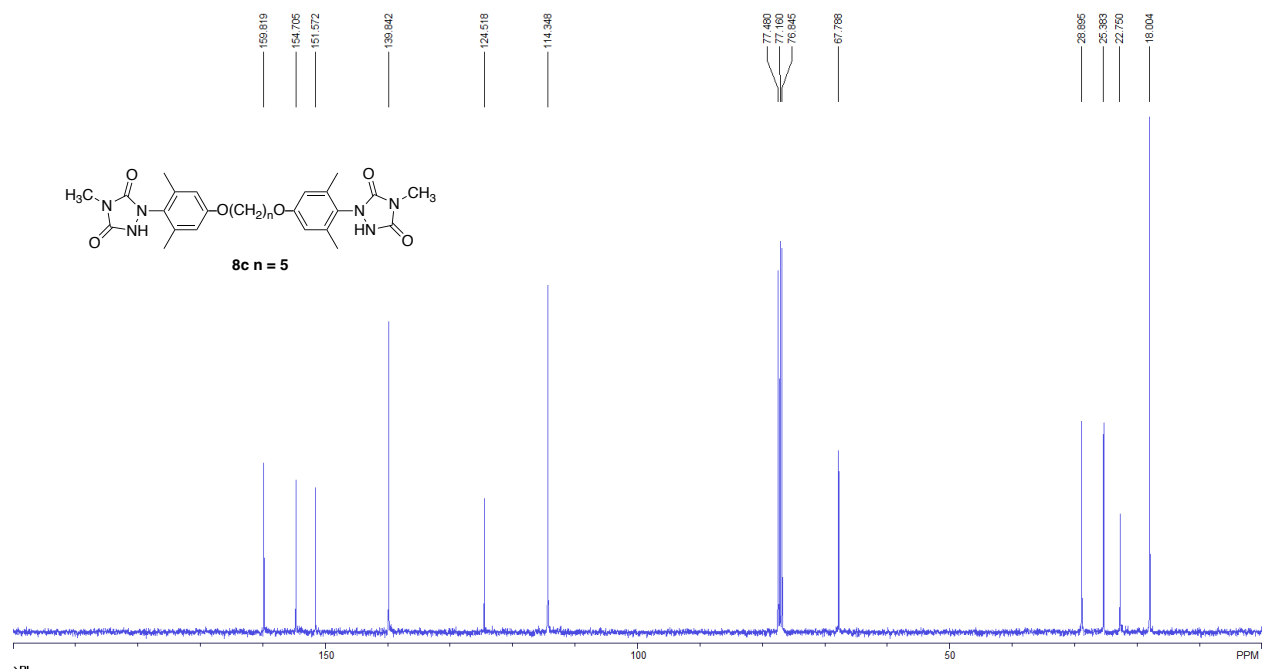

### $^1\text{H}$ NMR Spectrum of Monomer $4\text{c}_1$ ( $\text{CDCl}_3$ , 400 MHz)

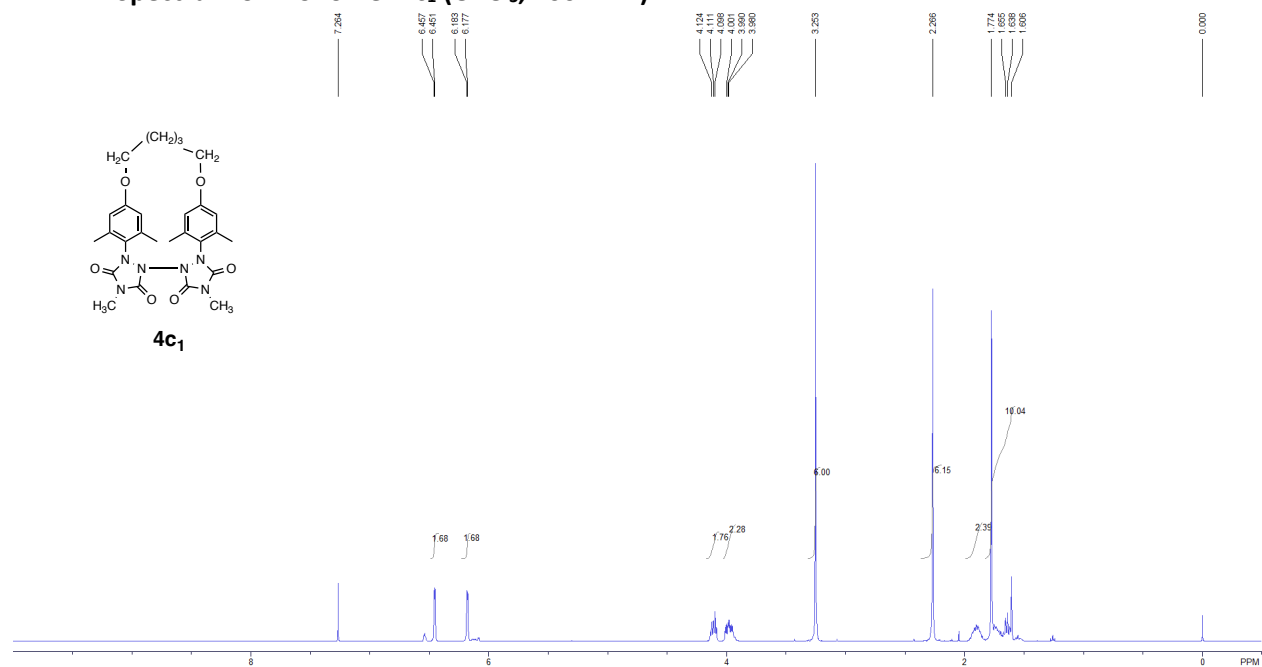

### $^{13}\text{C}\{^1\text{H}\}$ NMR Spectrum of Monomer $4\text{c}_1$ ( $\text{CDCl}_3$ , 100 MHz)

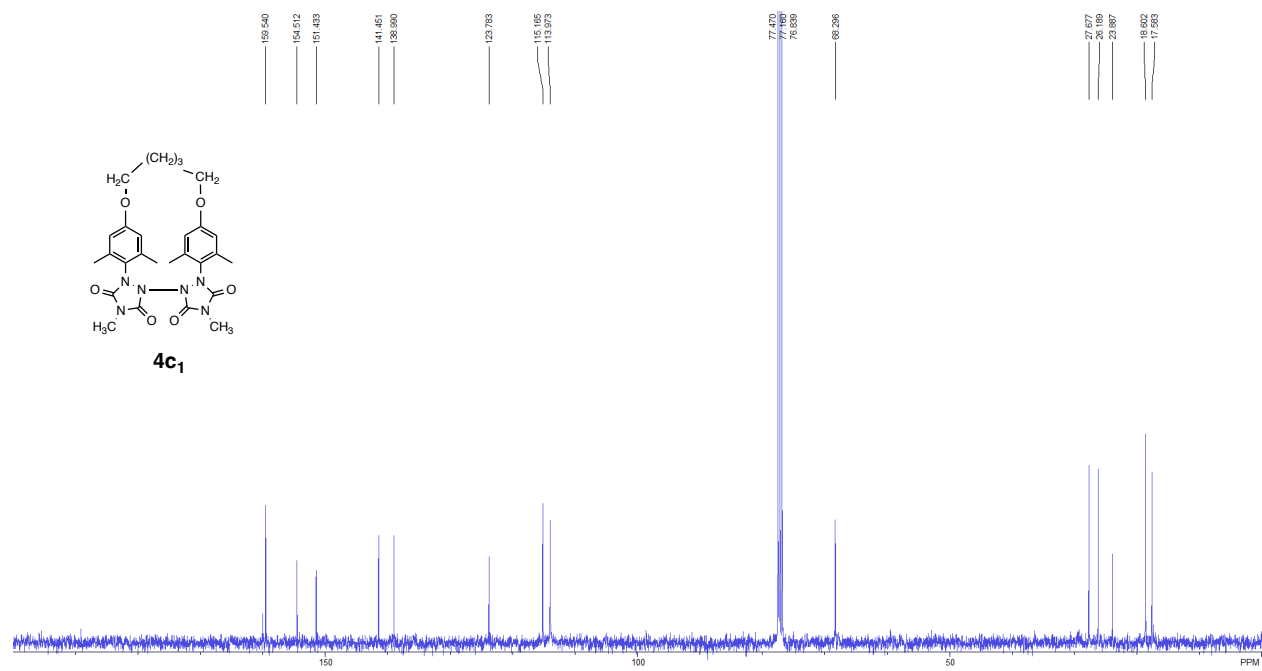

### <sup>1</sup>H NMR Spectrum of Dimer 4c<sub>2</sub> (CDCl<sub>3</sub>, 400 MHz)

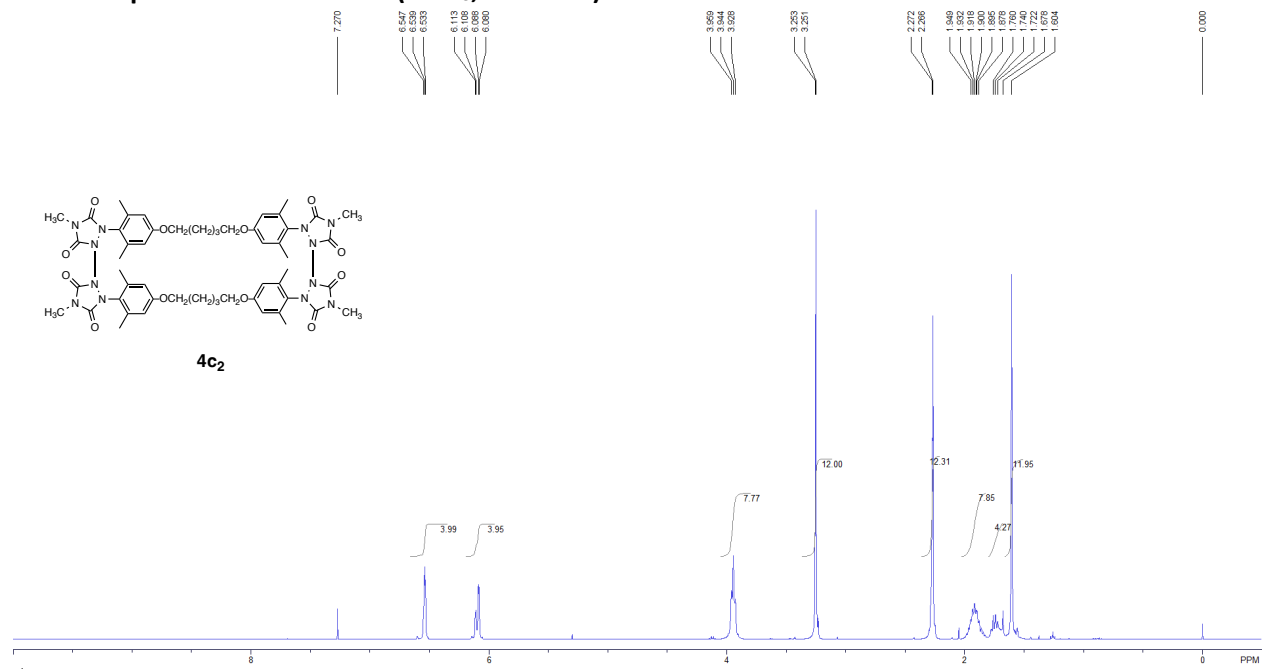

### <sup>13</sup>C{<sup>1</sup>H} NMR Spectrum of Dimer 4c<sub>2</sub> (CDCl<sub>3</sub>, 100 MHz)

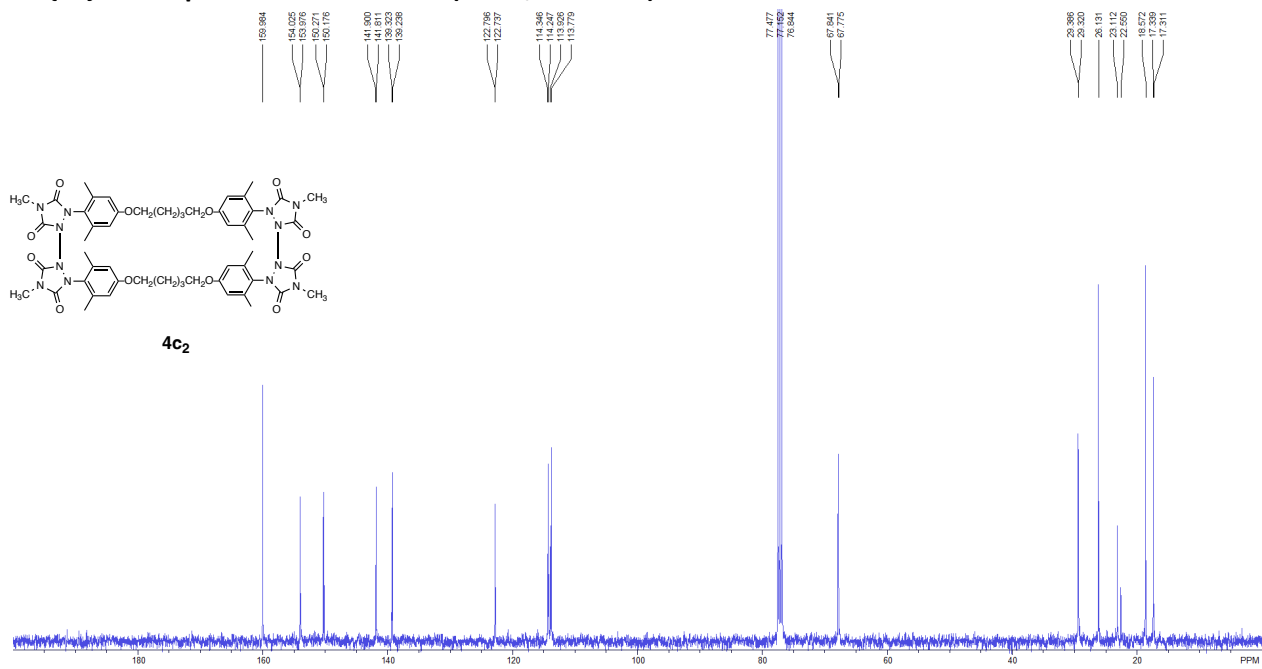

### $^1\text{H}$ NMR Spectrum of Compound 7d ( $\text{CDCl}_3$ , 400 MHz)

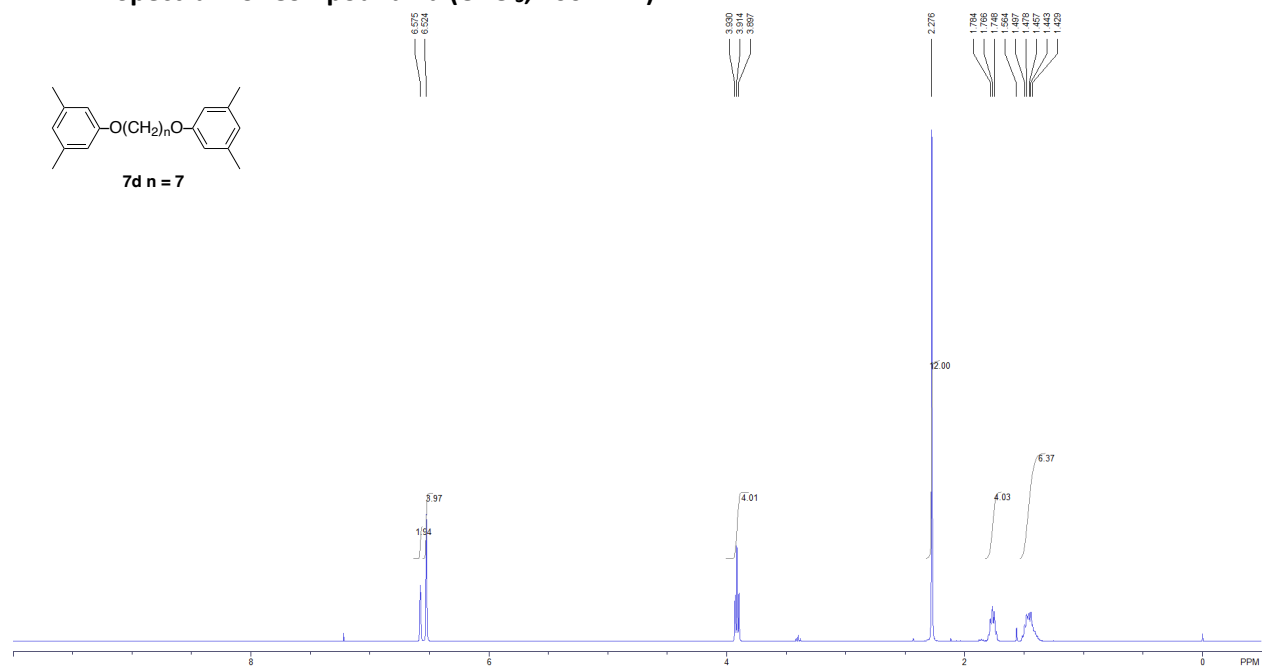

### $^{13}\text{C}\{^1\text{H}\}$ NMR Spectrum of Compound 7d ( $\text{CDCl}_3$ , 100 MHz)

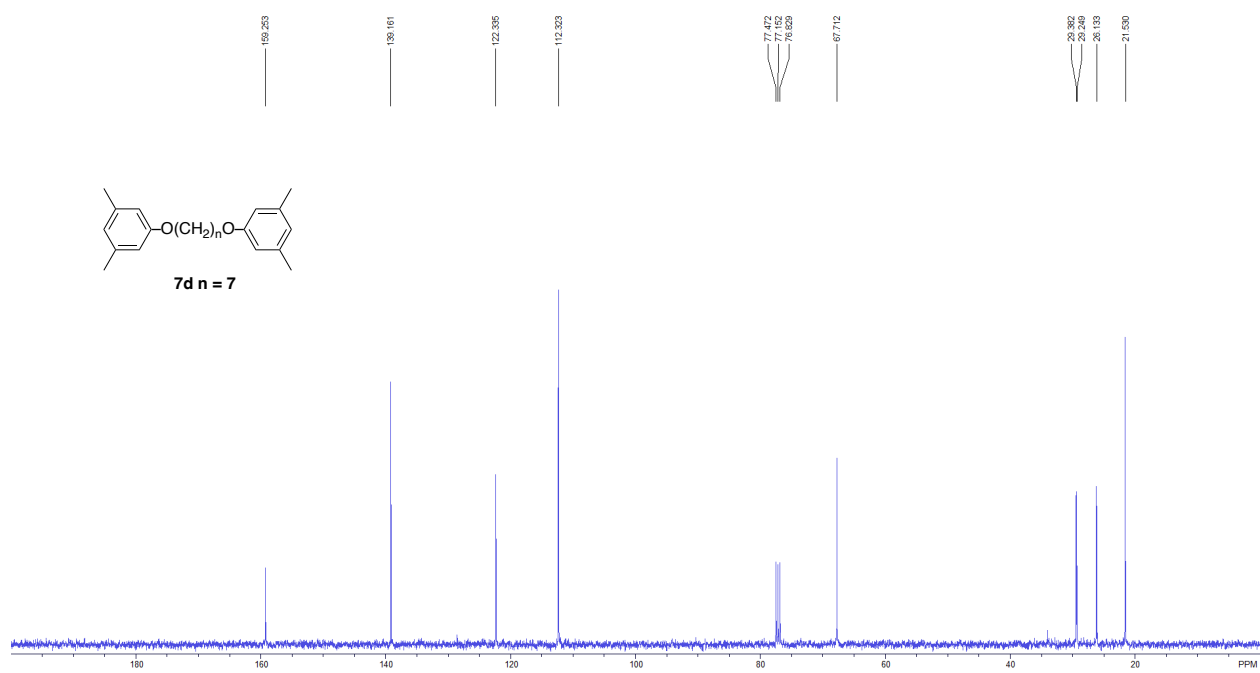

### <sup>1</sup>H NMR Spectrum of Compound 8d (CDCl<sub>3</sub>, 400 MHz)

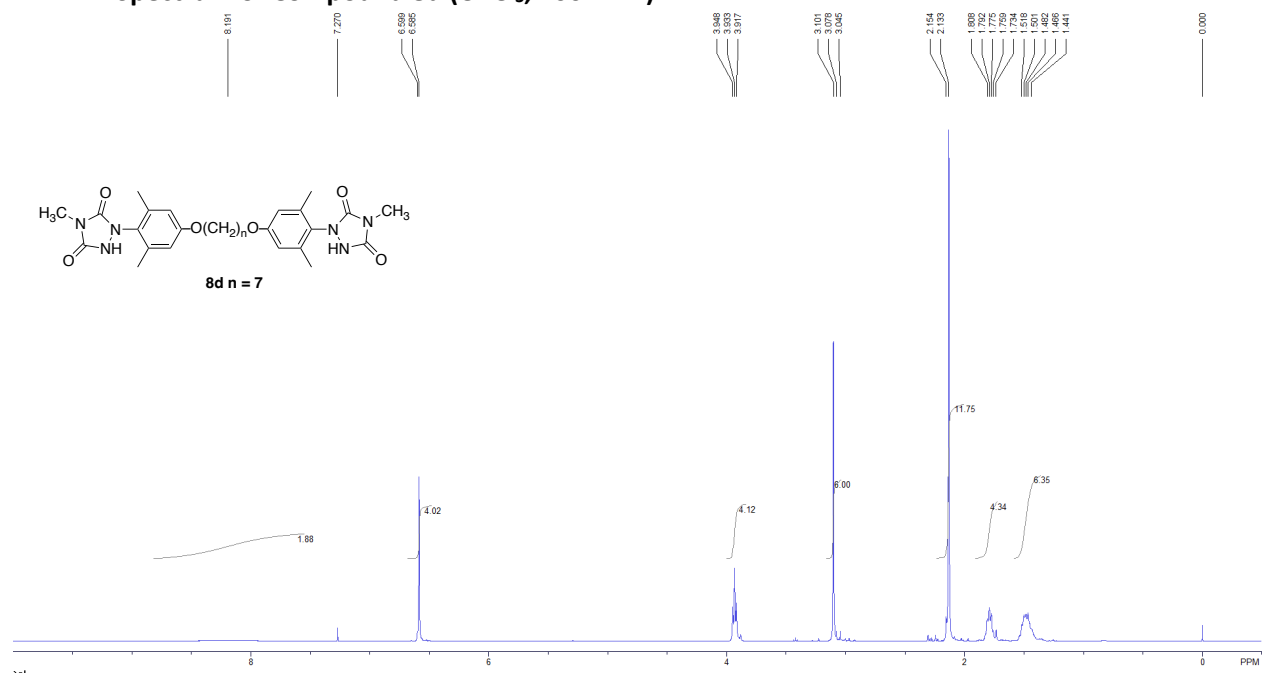

### <sup>13</sup>C{<sup>1</sup>H} NMR Spectrum of Compound 8d (CDCl<sub>3</sub>, 100 MHz)

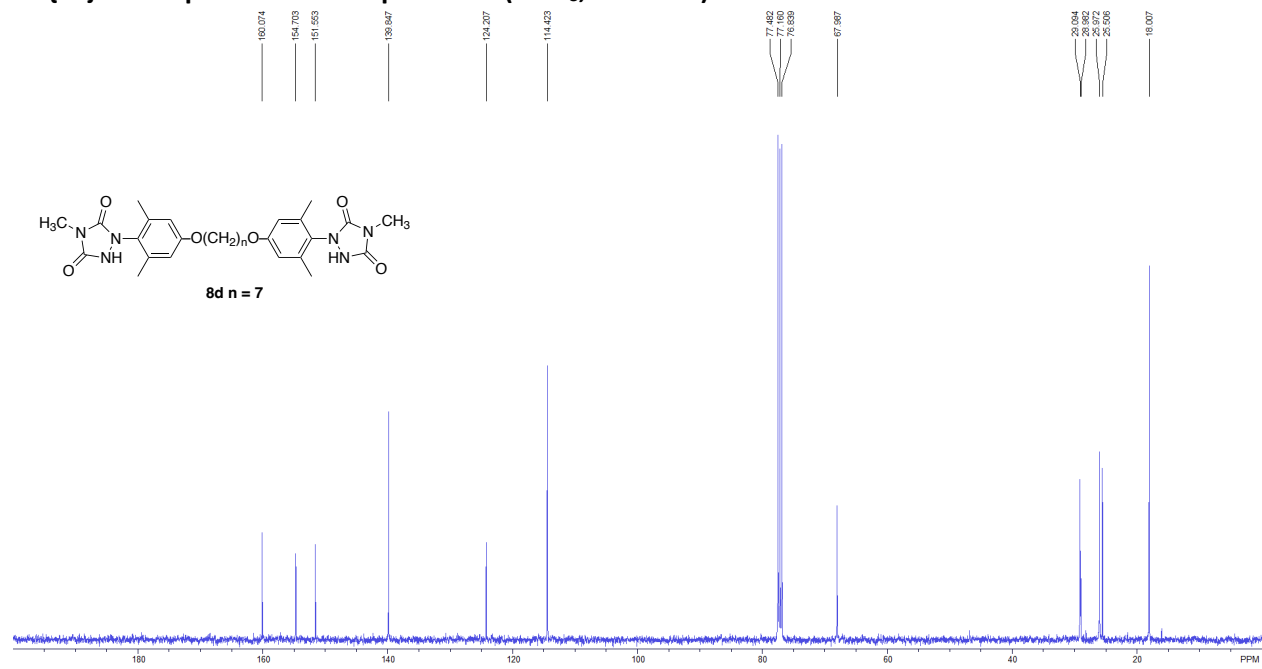

### $^1\text{H}$ NMR Spectrum of Monomer $4d_1$ ( $\text{CDCl}_3$ , 400 MHz)

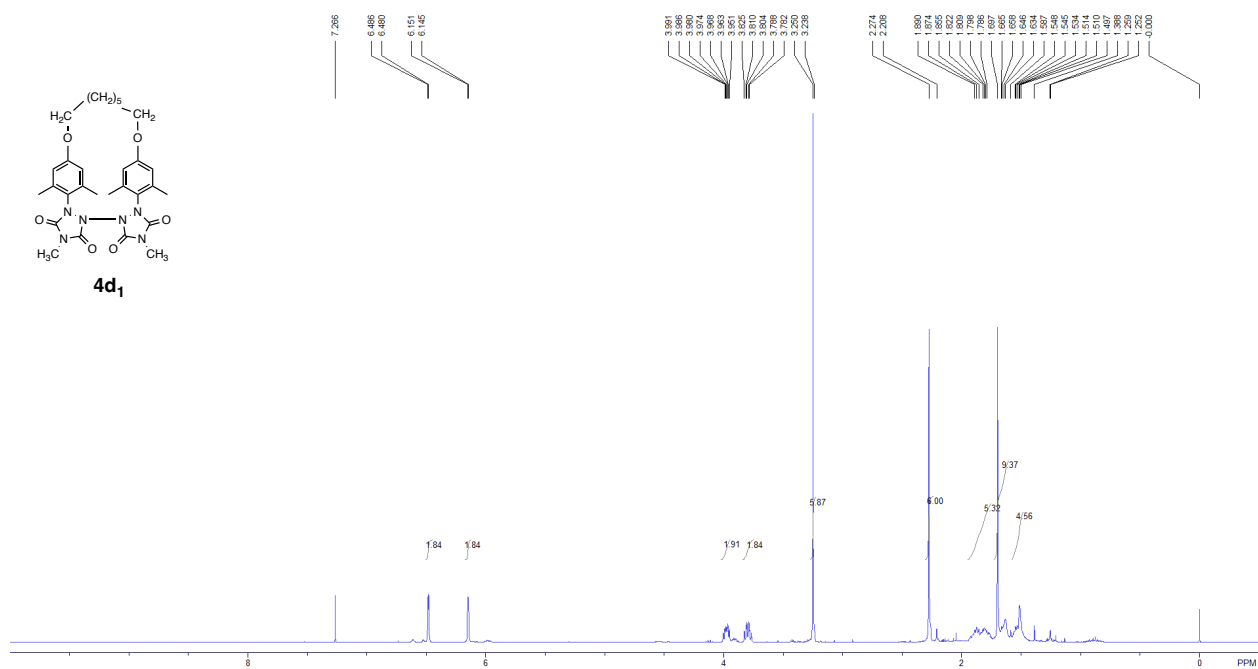

### $^{13}\text{C}\{^1\text{H}\}$ NMR Spectrum of Monomer $4d_1$ ( $\text{CDCl}_3$ , 100 MHz)

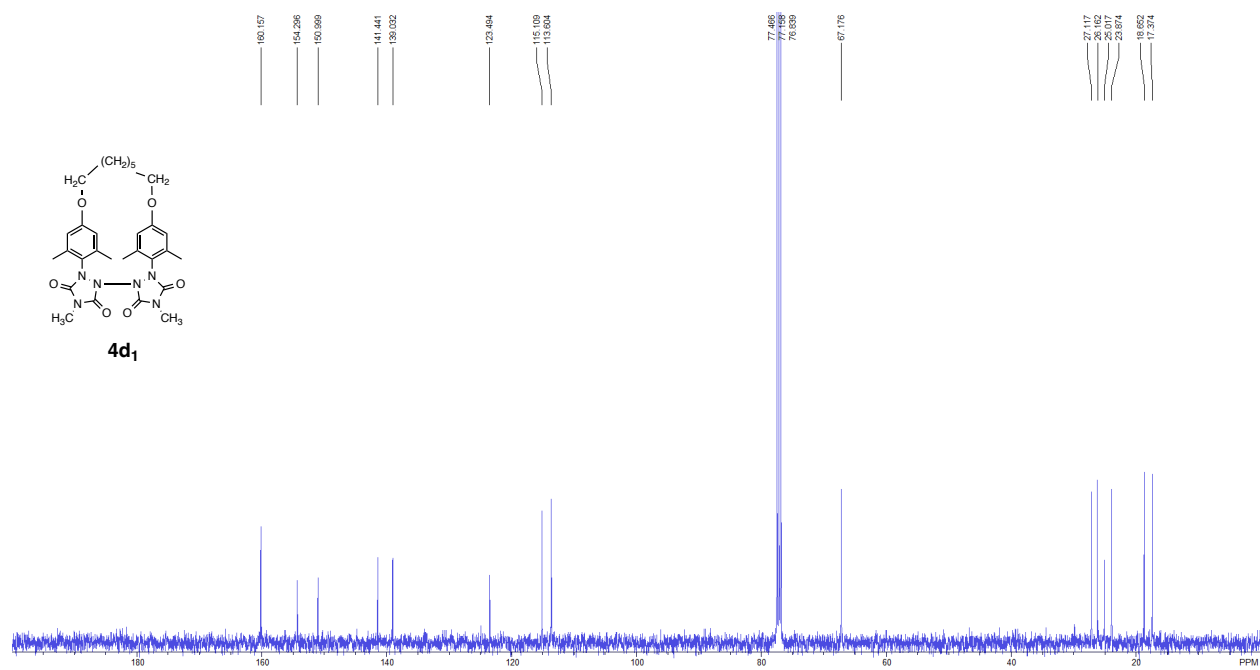

### $^1\text{H}$ NMR Spectrum of Dimer $4d_2$ ( $\text{CDCl}_3$ , 400 MHz)

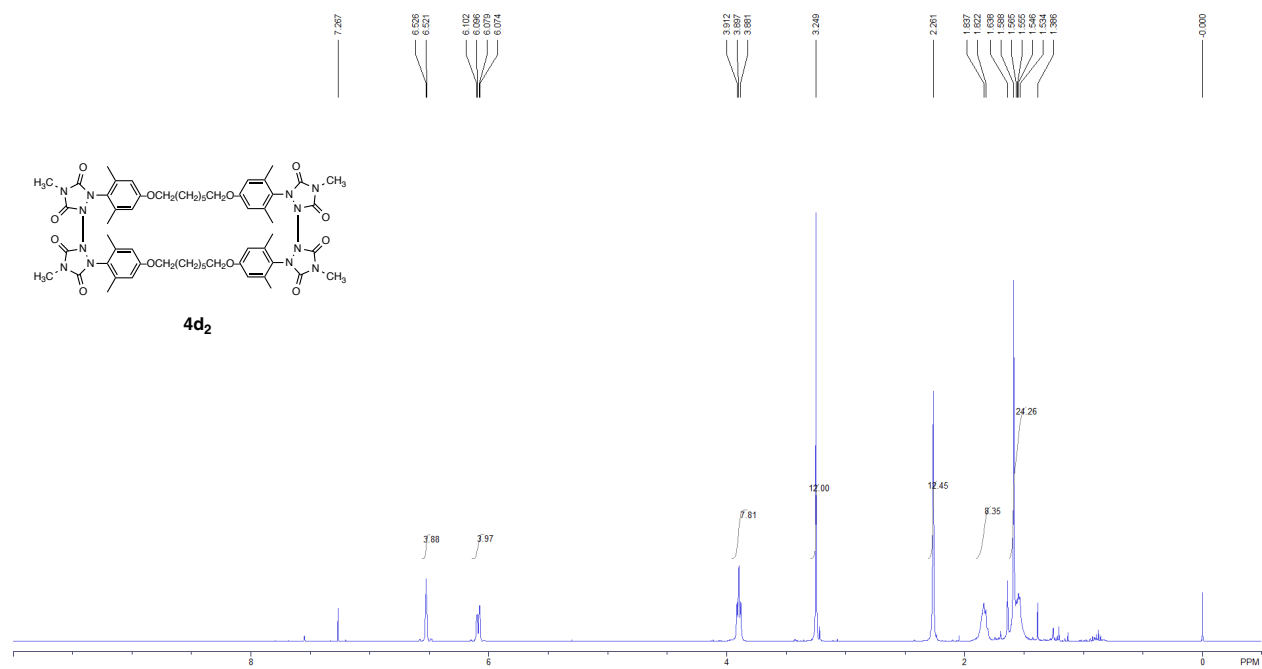

### $^{13}\text{C}\{^1\text{H}\}$ NMR Spectrum of Dimer $4d_2$ ( $\text{CDCl}_3$ , 100 MHz)

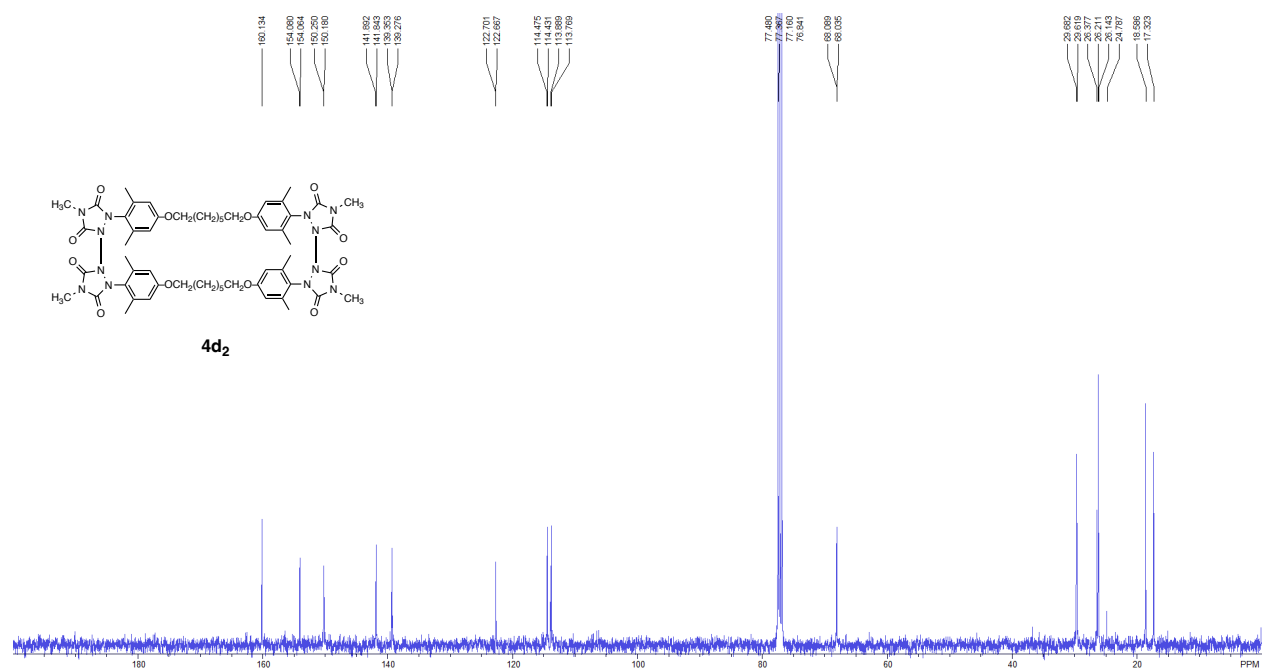



**<sup>1</sup>H NMR Spectrum of Compound 7e (CDCl<sub>3</sub>, 400 MHz)**

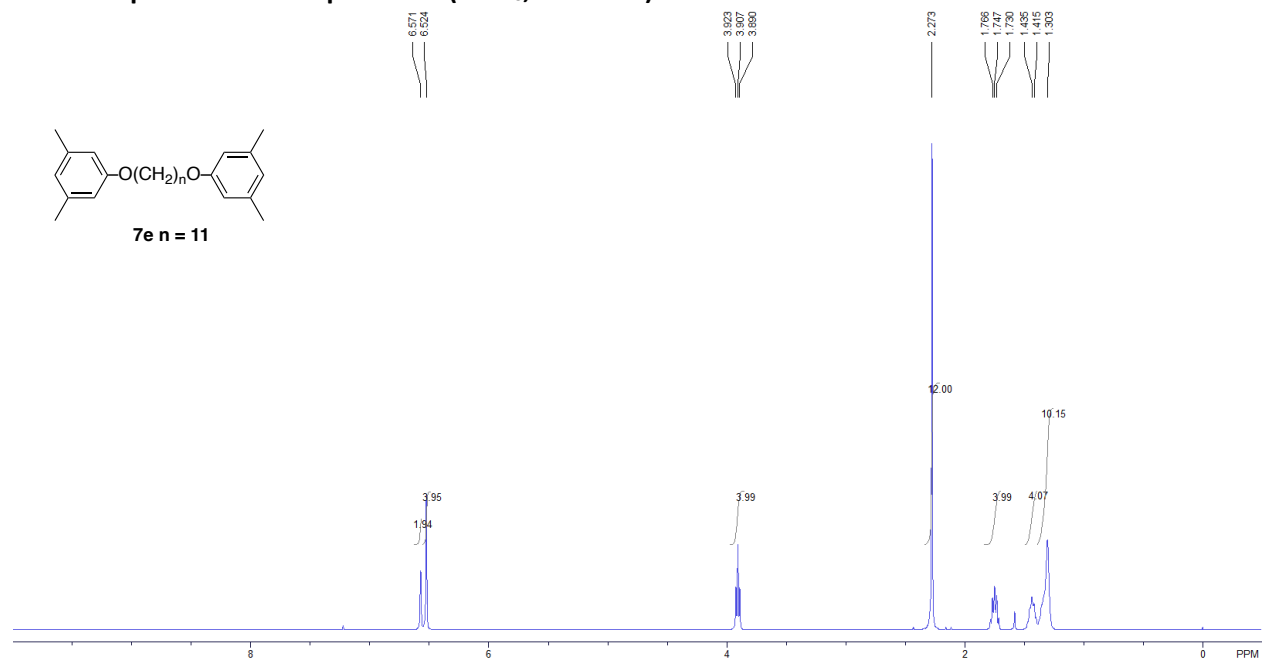

**<sup>13</sup>C{<sup>1</sup>H} NMR Spectrum of Compound 7e (CDCl<sub>3</sub>, 100 MHz)**

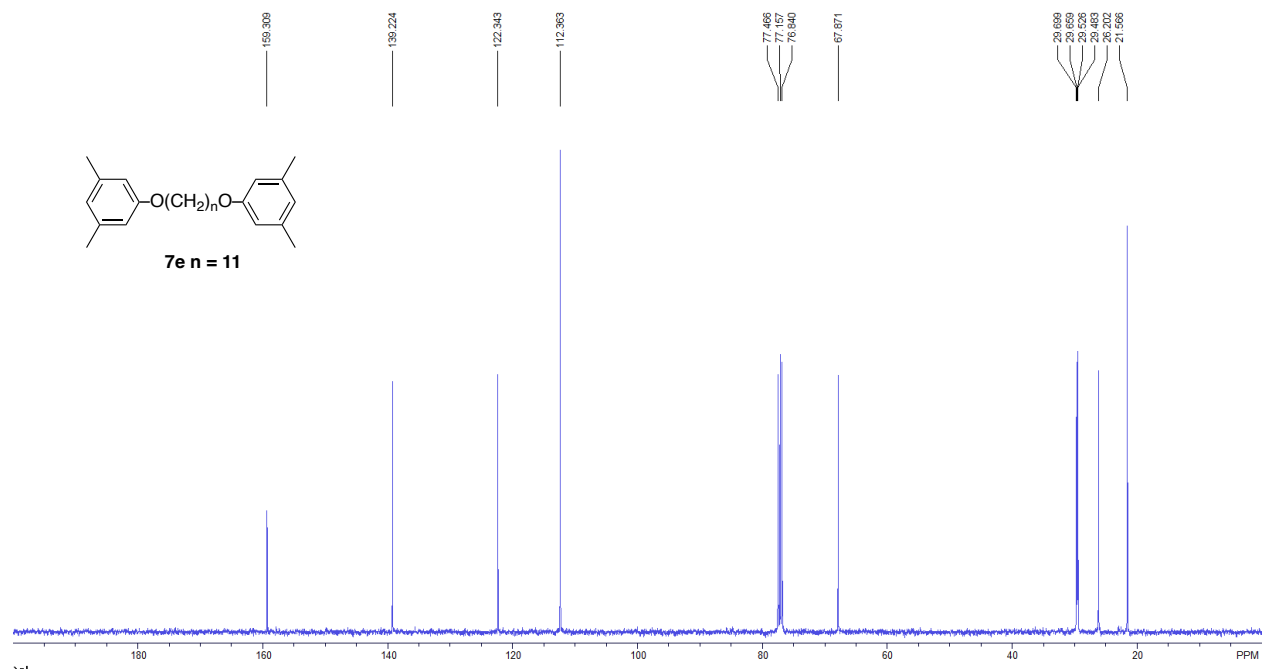

### $^1\text{H}$ NMR Spectrum of Compound **8e** ( $\text{CDCl}_3$ , 400 MHz)

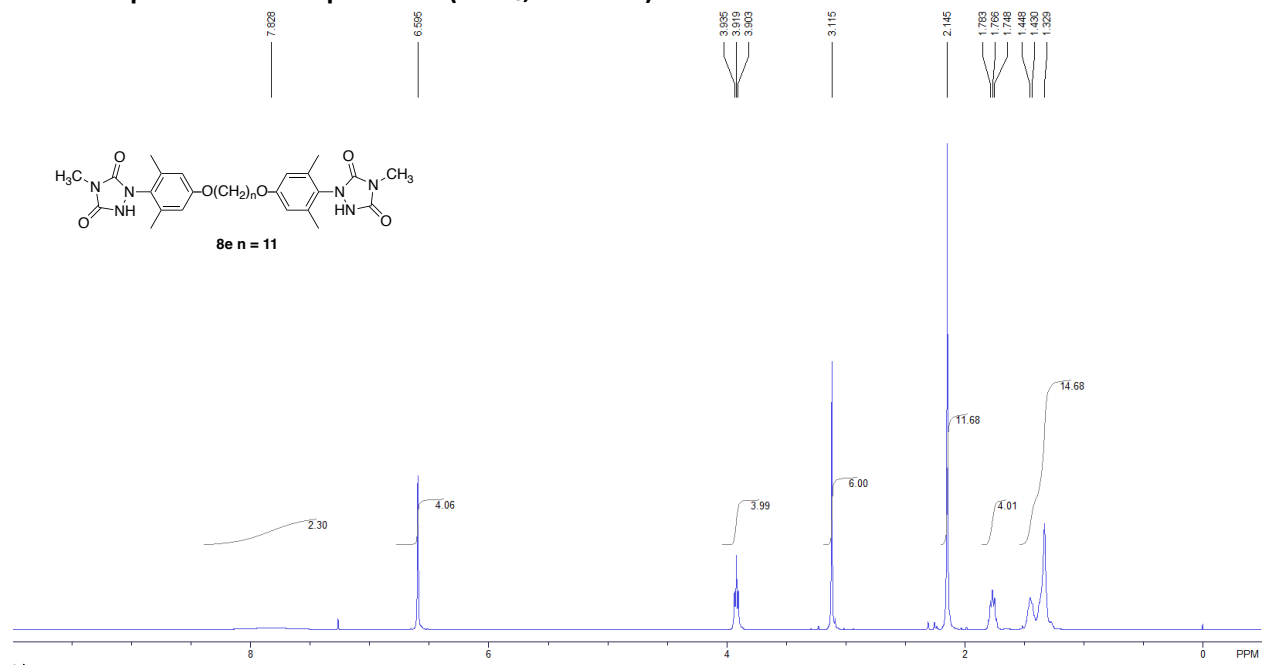

### $^{13}\text{C}\{^1\text{H}\}$ NMR Spectrum of Compound **8e** ( $\text{CDCl}_3$ , 100 MHz)

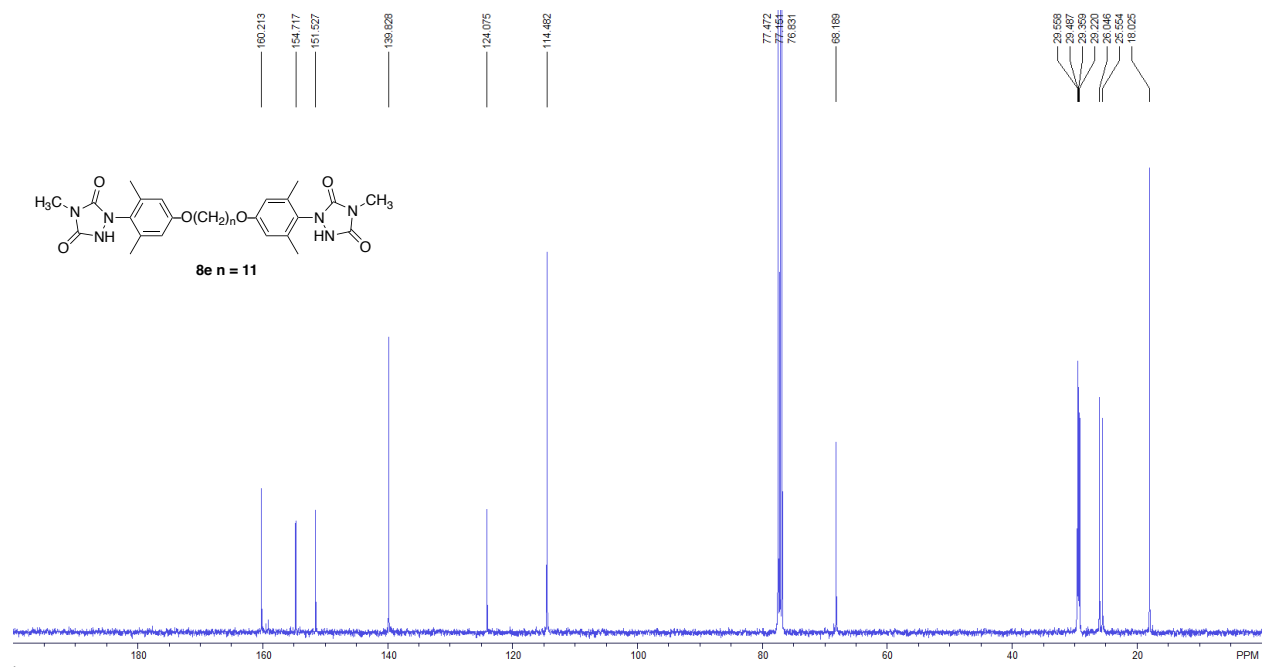

**<sup>1</sup>H NMR Spectrum of Monomer 4e<sub>1</sub> (CDCl<sub>3</sub>, 400 MHz)**

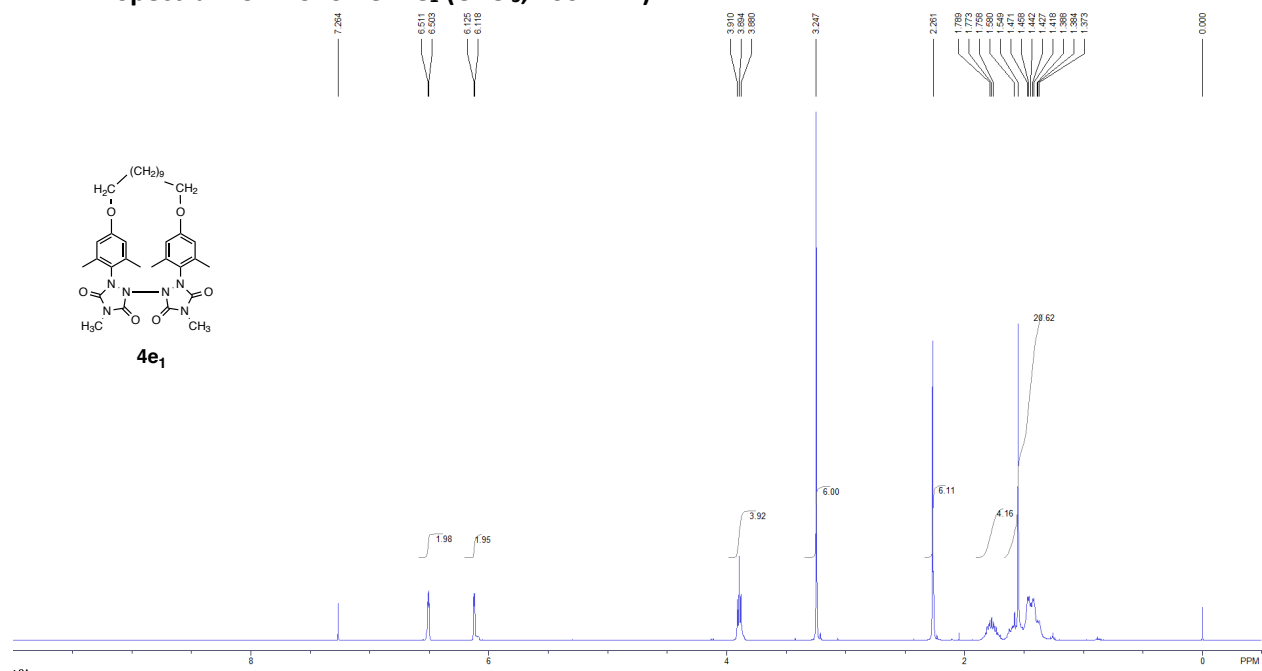

**<sup>13</sup>C{<sup>1</sup>H} NMR Spectrum of Monomer 4e<sub>1</sub> (CDCl<sub>3</sub>, 100 MHz)**

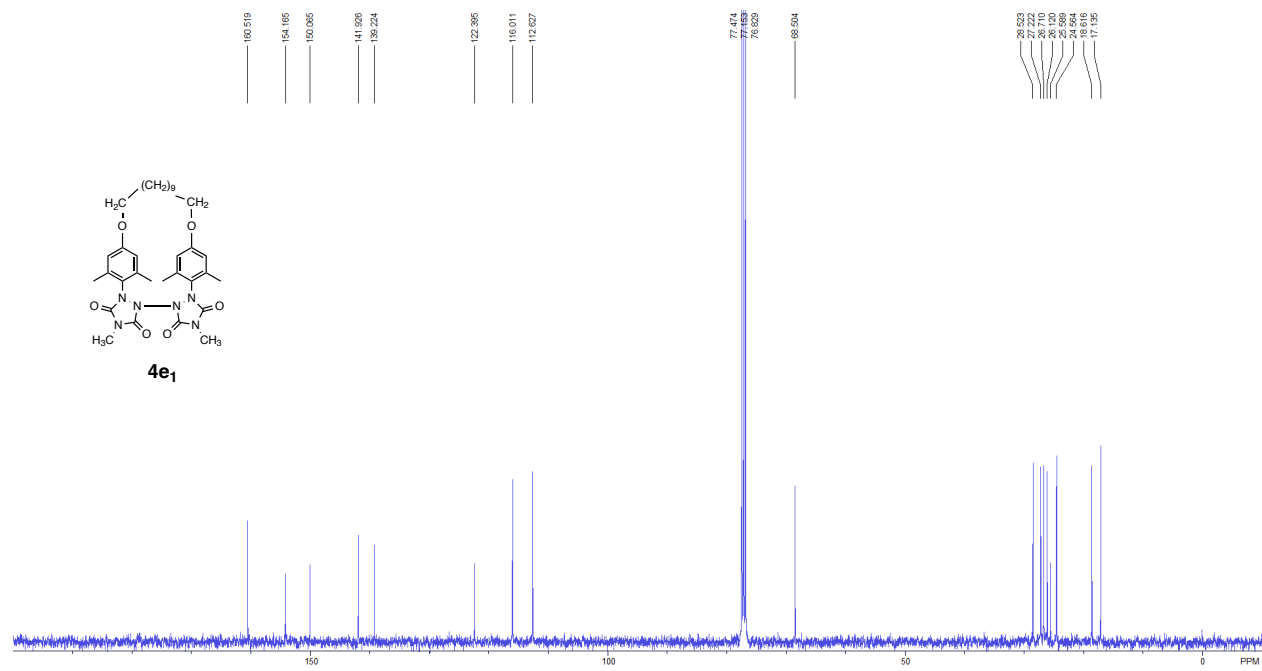

### $^1\text{H}$ NMR Spectrum of Dimer $4e_2$ ( $\text{CDCl}_3$ , 400 MHz)

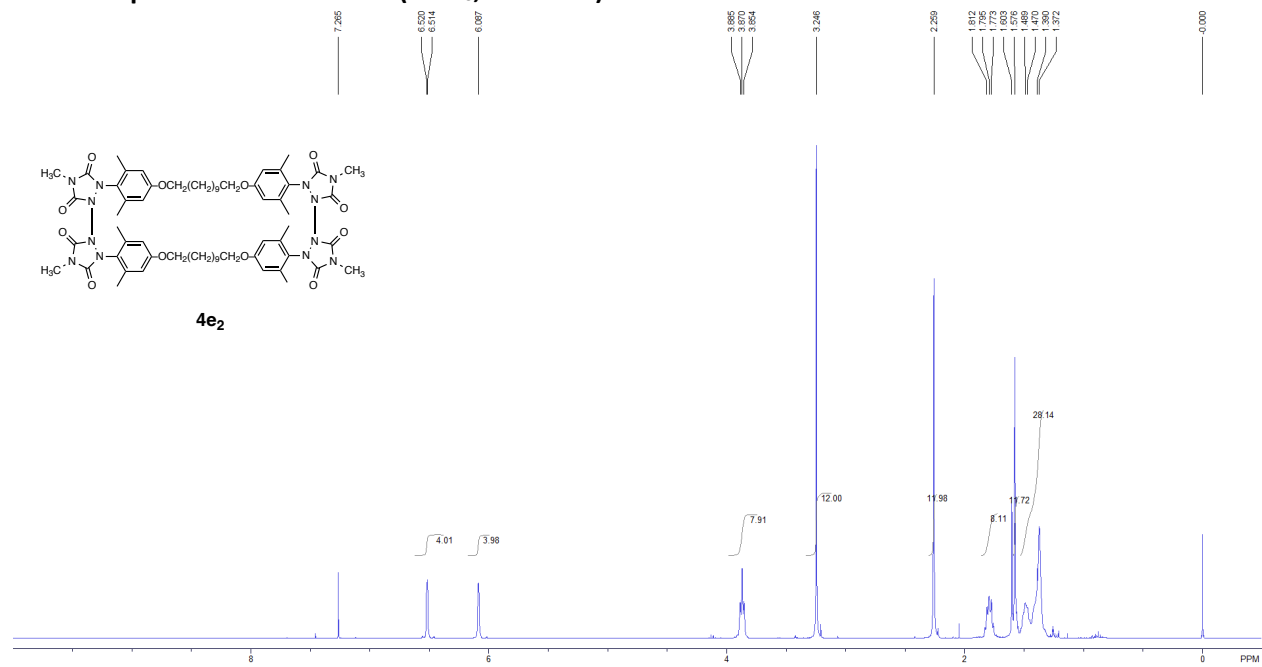

### $^{13}\text{C}\{^1\text{H}\}$ NMR Spectrum of Dimer $4e_2$ ( $\text{CDCl}_3$ , 100 MHz)

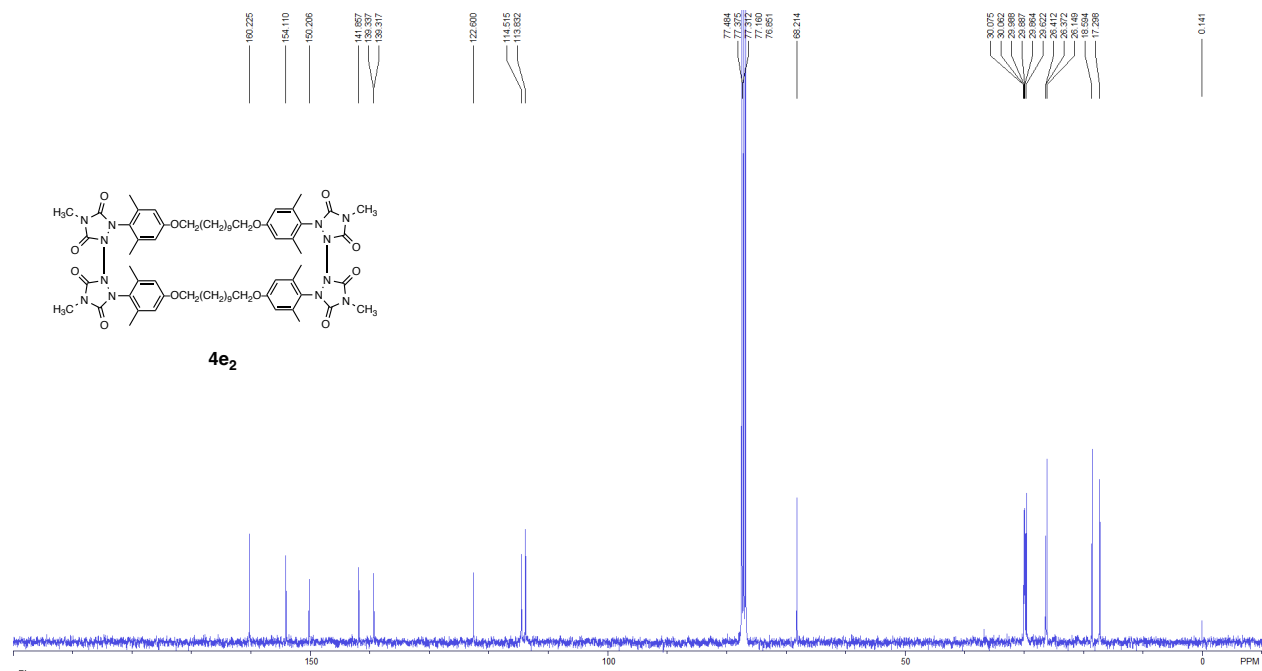

# DOSY spectrum of a mixture of monomer $4c_1$ and dimer $4c_2$

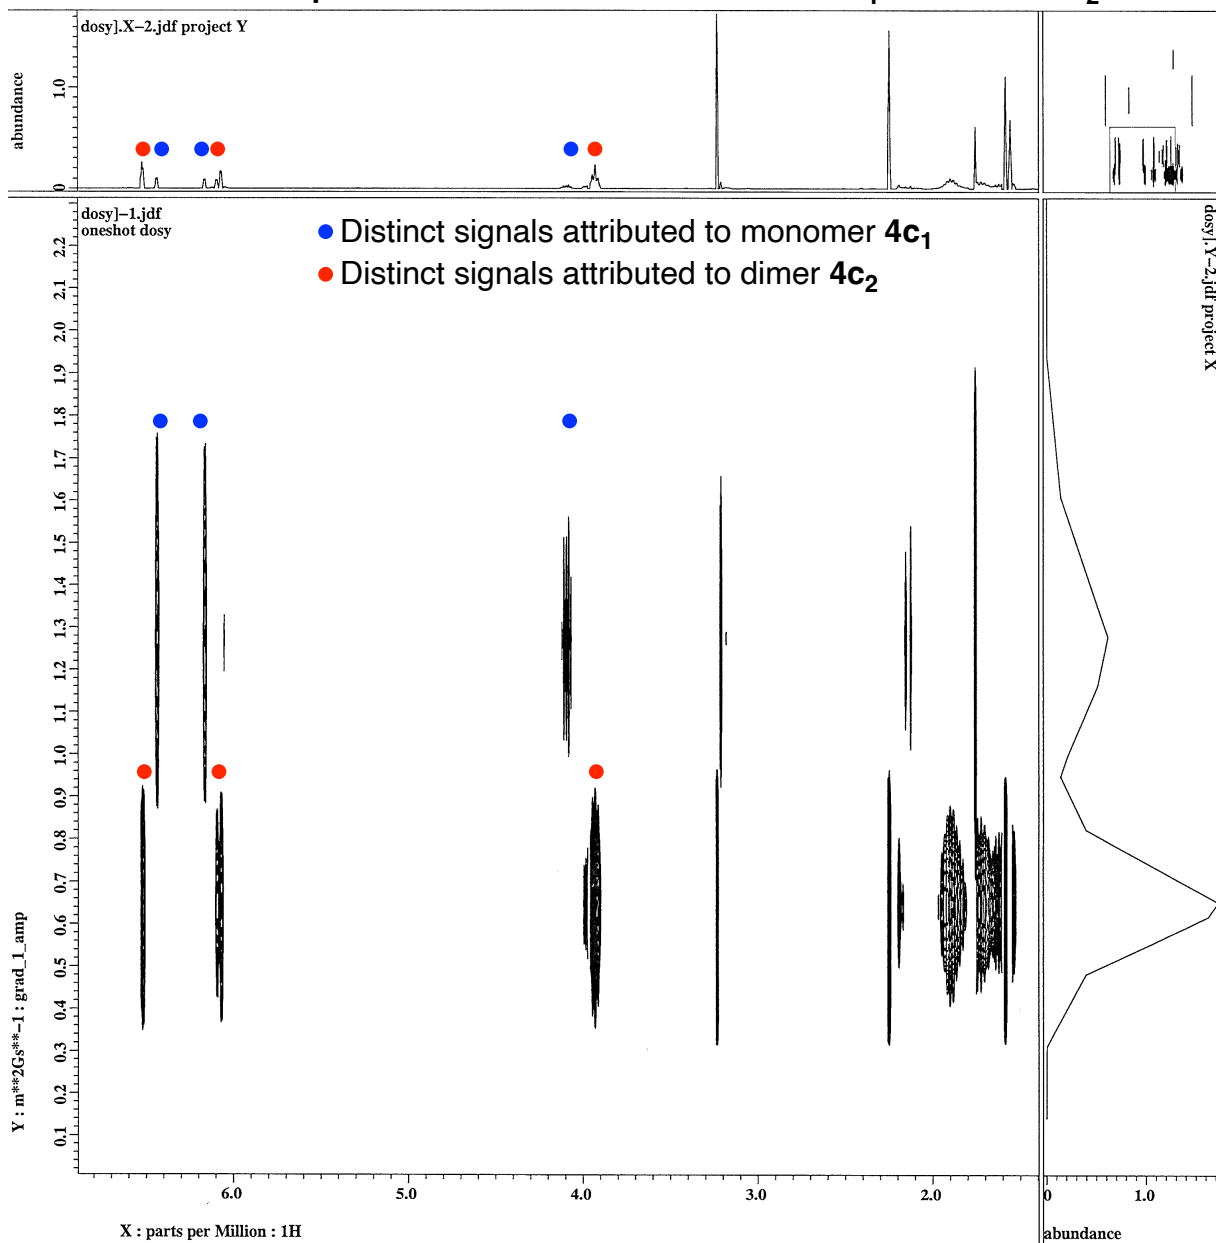

### DOSY spectrum of a mixture of monomer $4e_1$ and dimer $4e_2$

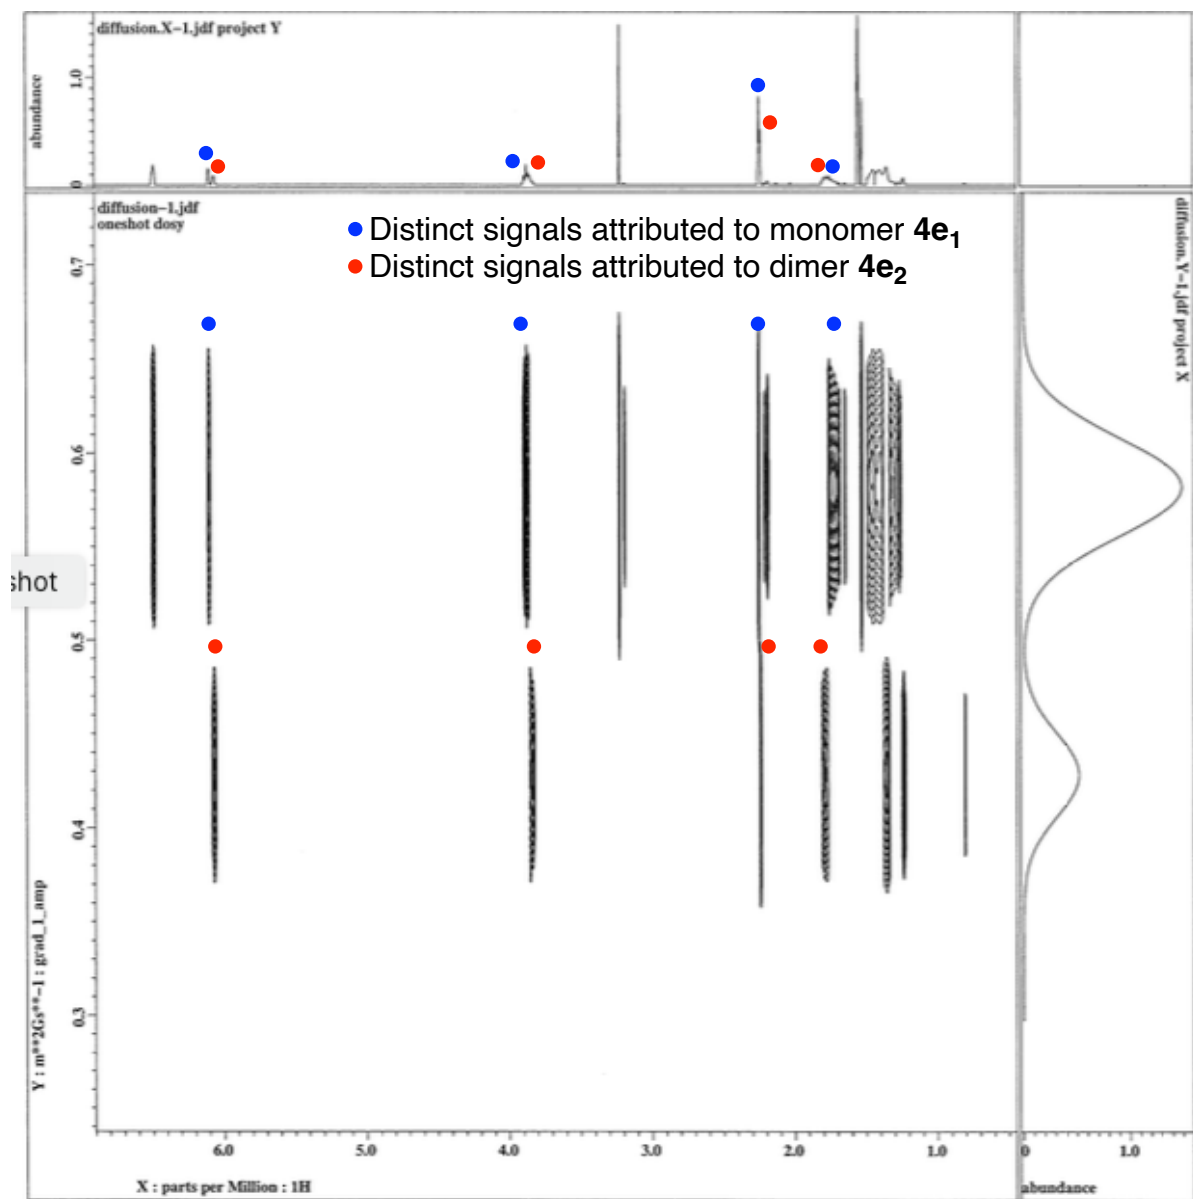

# <sup>1</sup>H NMR Spectra Used to Determine the Temperature Dependence of the Equilibrium Between Monomer **4c<sub>1</sub>** and Dimer **4c<sub>2</sub>**

All spectra are collected as solutions in DMSO-d<sub>6</sub> at 400 MHz. The signals used for integrations are those at 6.65 ppm for dimer **4c<sub>2</sub>** (4H) and 6.53 ppm for monomer **4c<sub>1</sub>** (2H). The percentage of **4c<sub>2</sub>** was calculated according to  $([1/2(\text{integration of } \mathbf{4c_2} \text{ signal})] / [1/2(\text{integration of } \mathbf{4c_2} \text{ signal}) + 1])$

Temperature = 20 °C

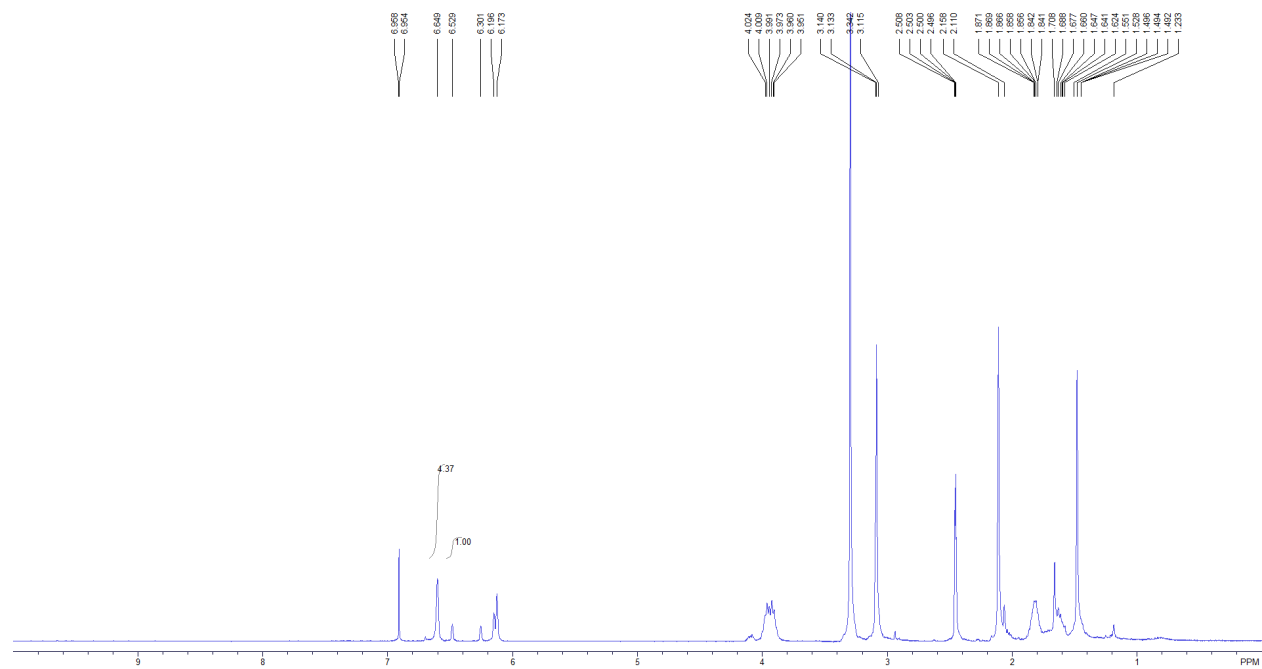

Temperature = 30 °C

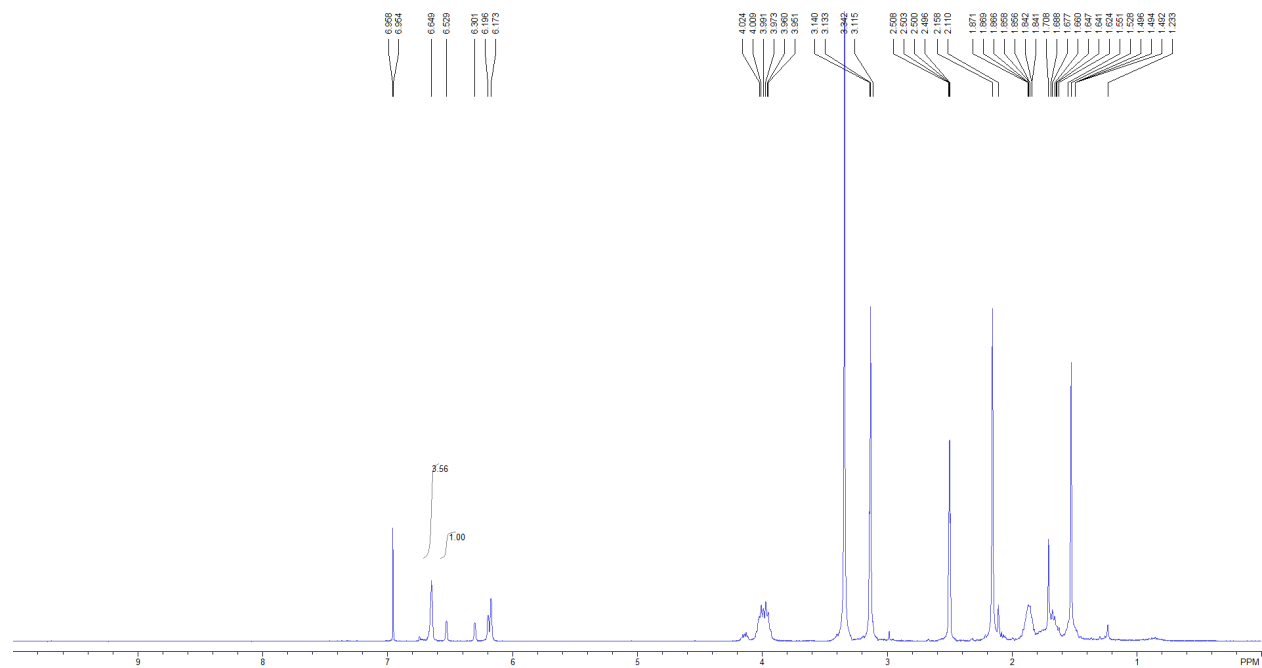

Temperature = 40 °C

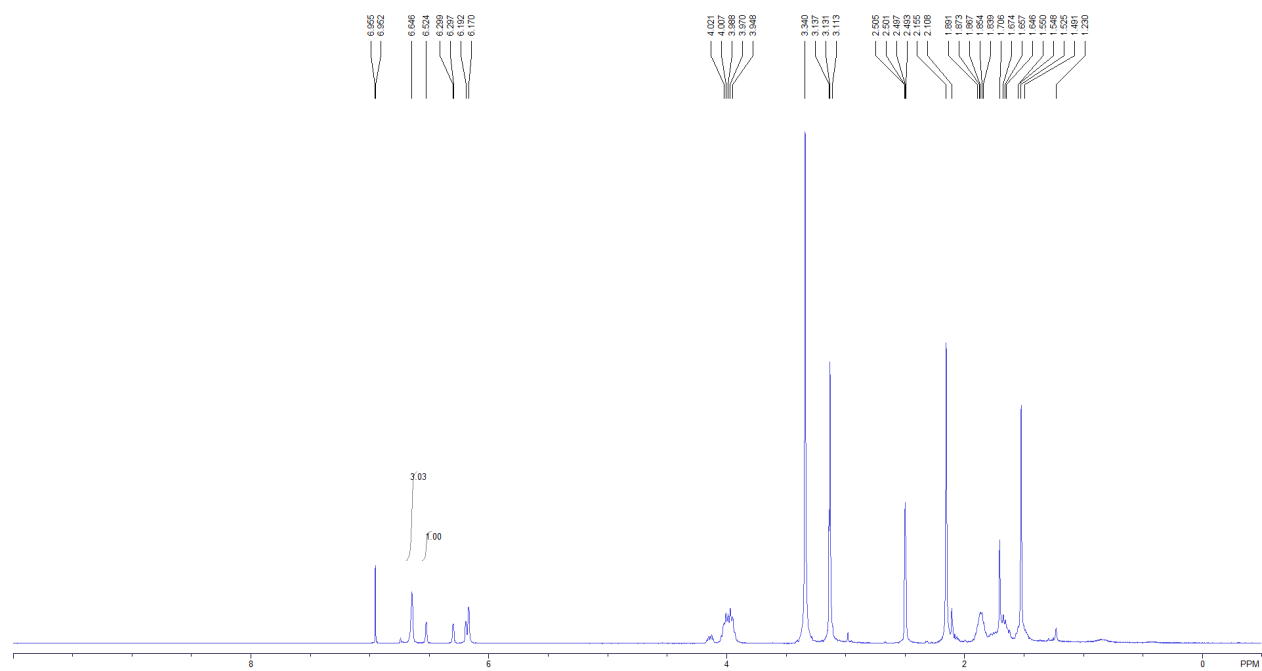

Temperature = 50 °C

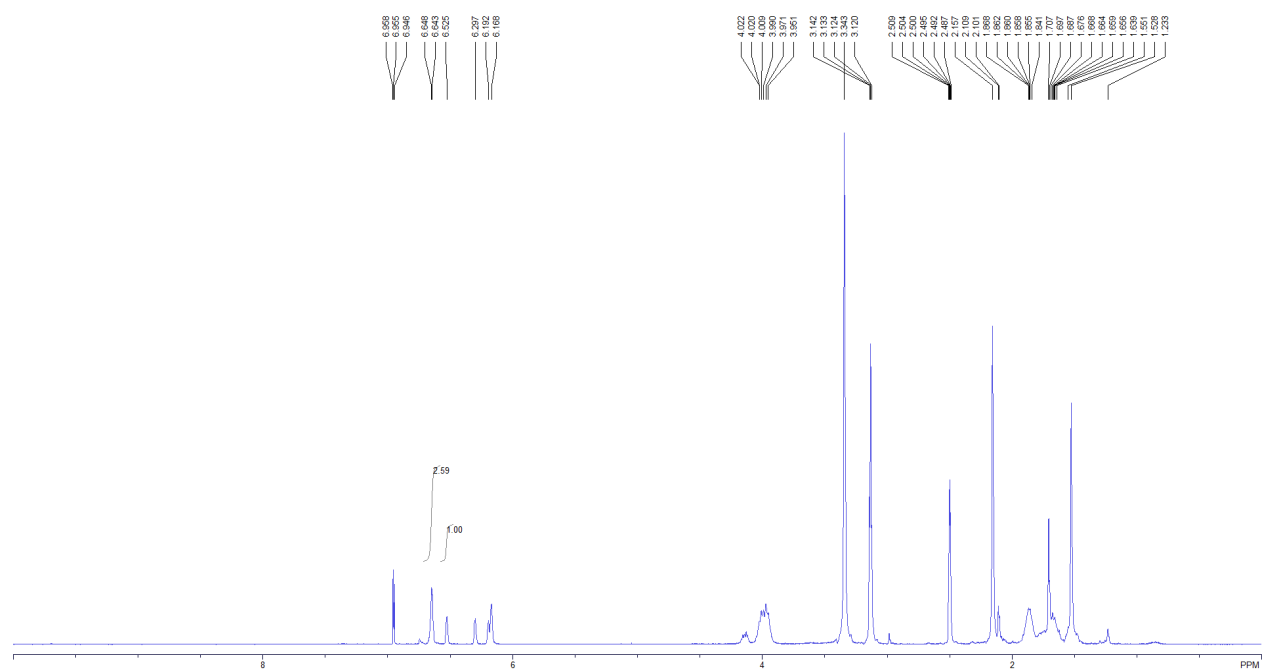



Temperature = 60 °C

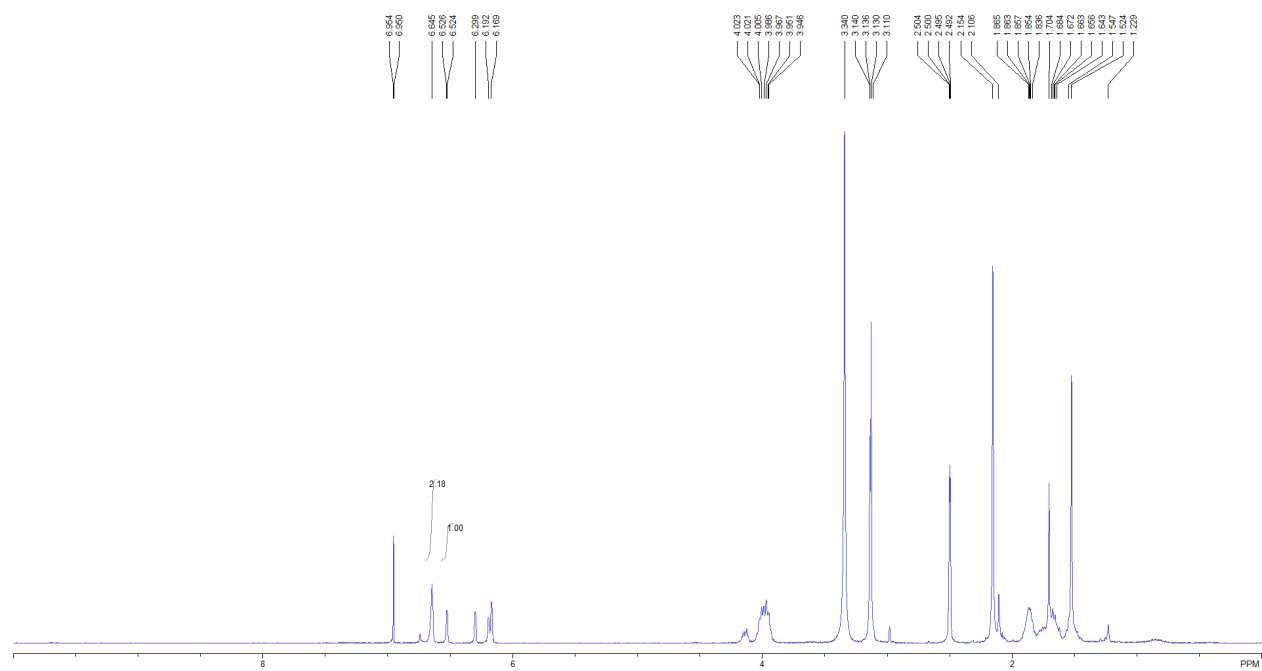

## <sup>1</sup>H NMR Spectra Used to Determine the Concentration Dependence of the Equilibrium Between Monomer **4c<sub>1</sub>** and Dimer **4c<sub>2</sub>**

All spectra are collected as solutions in CDCl<sub>3</sub> at 400 MHz. The signals used for integrations are those at 6.65 ppm for dimer **4c<sub>2</sub>** (4H) and 6.52 ppm for monomer **4c<sub>1</sub>** (2H). The percentage of **4c<sub>2</sub>** was calculated according to  $([1/2(\text{integration of } \mathbf{4c_2} \text{ signal})] / [1/2(\text{integration of } \mathbf{4c_2} \text{ signal}) + 1])$

Initial Concentration = 62.9 mM

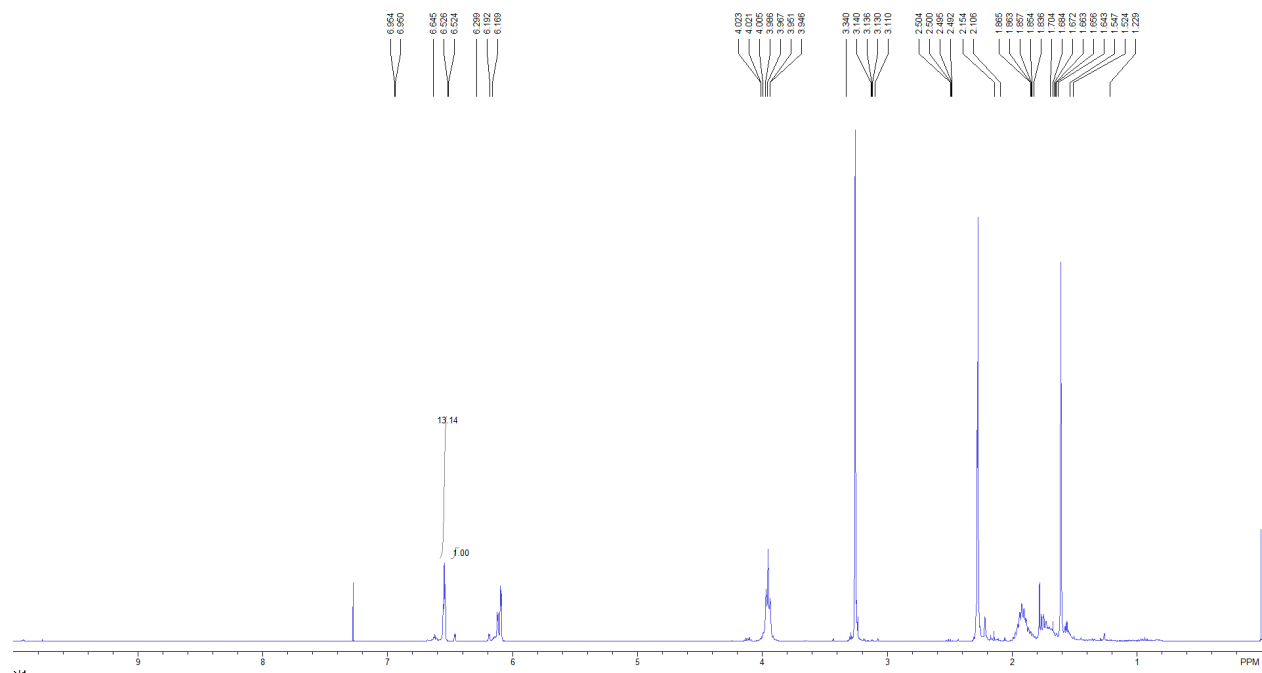

Initial Concentration = 31.4 mM

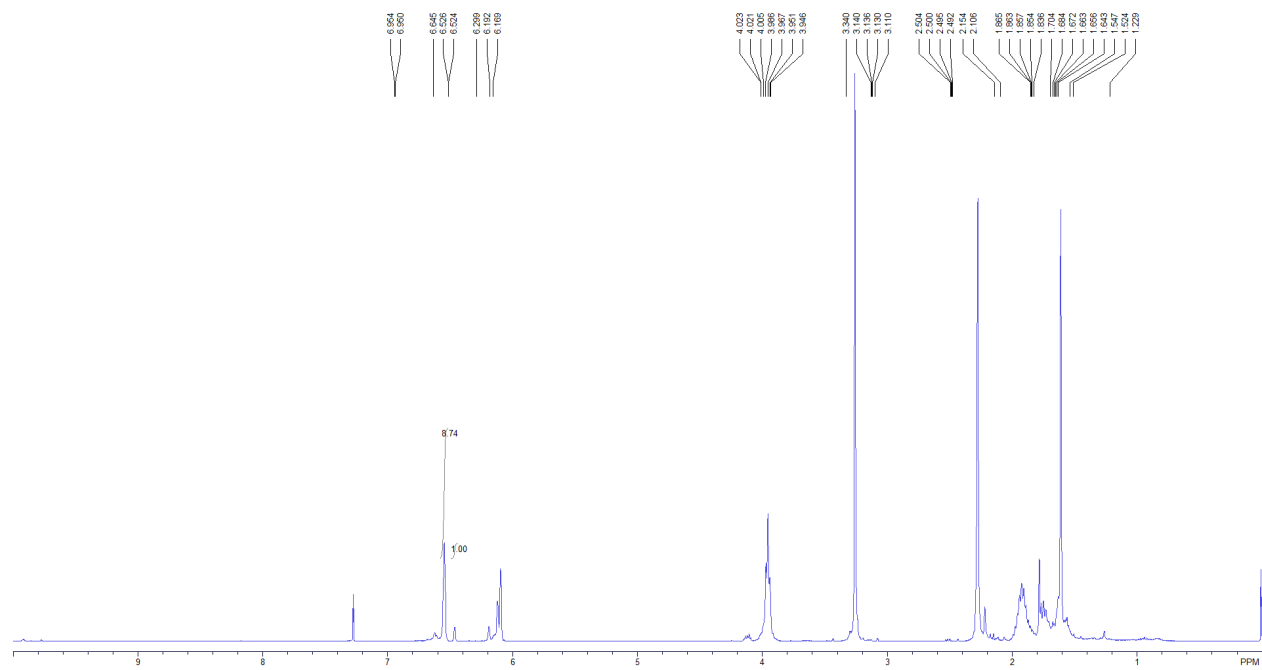

Initial Concentration = 15.7 mM

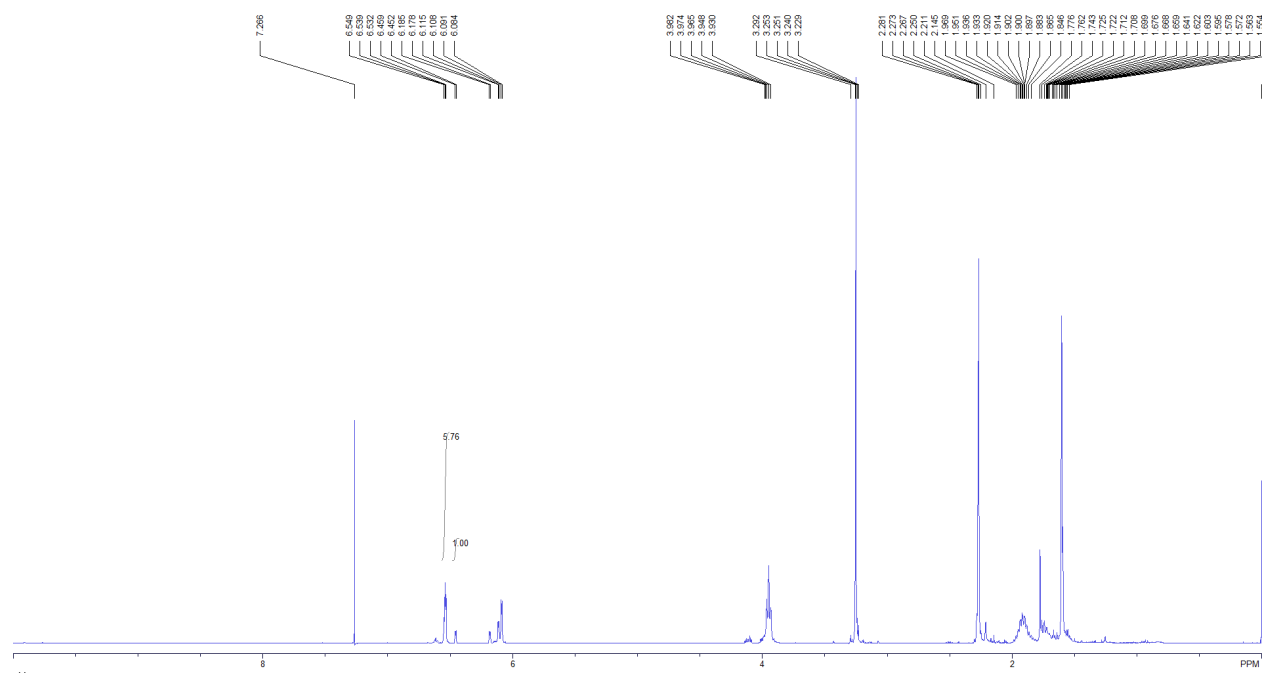

Initial Concentration = 7.9 mM

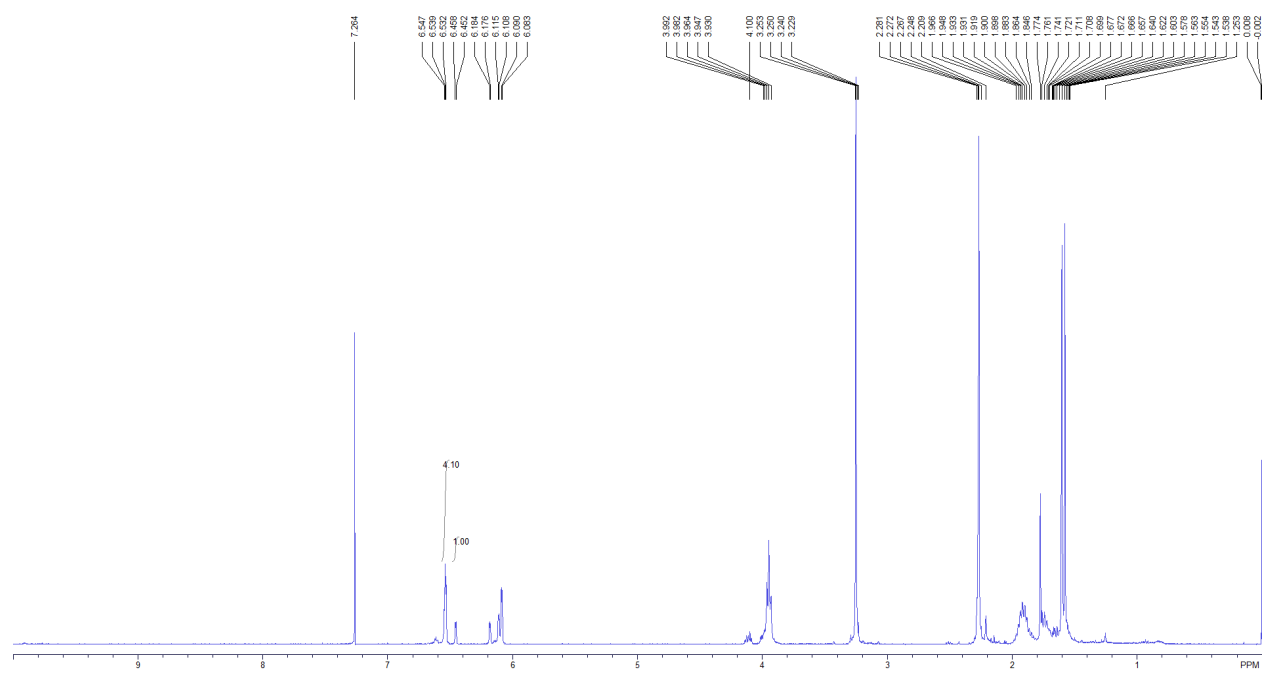

Initial Concentration = 3.9 mM

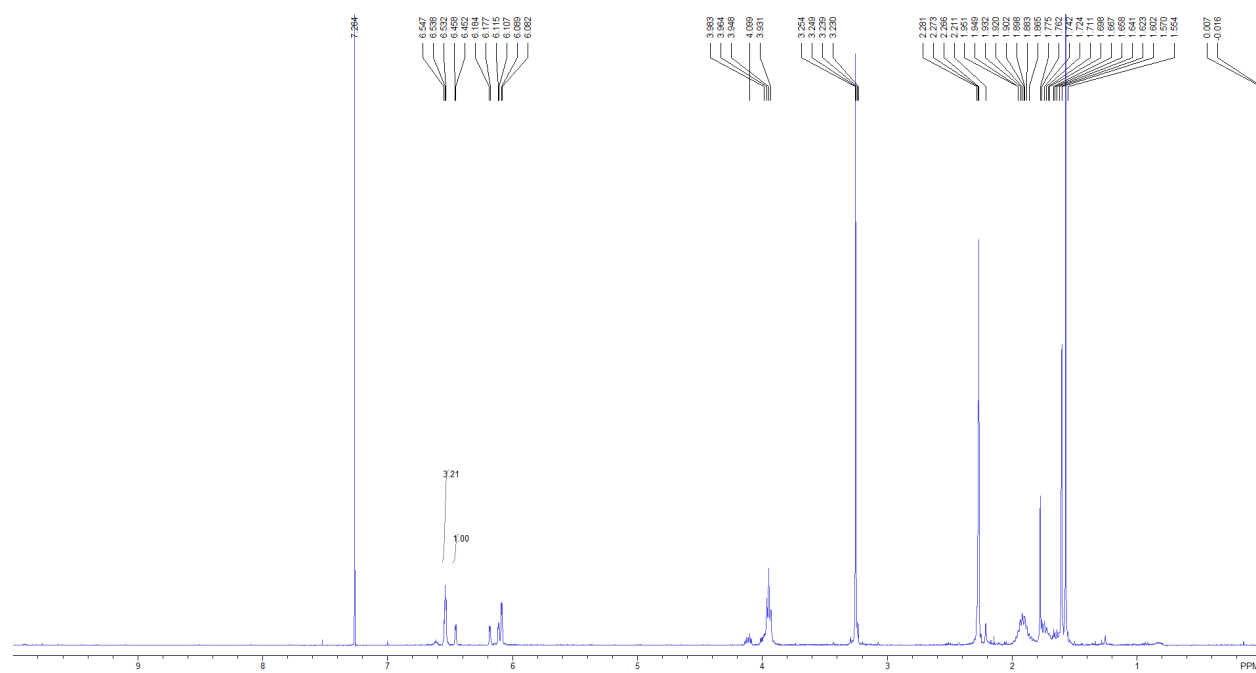

Initial Concentration = 2.0 mM

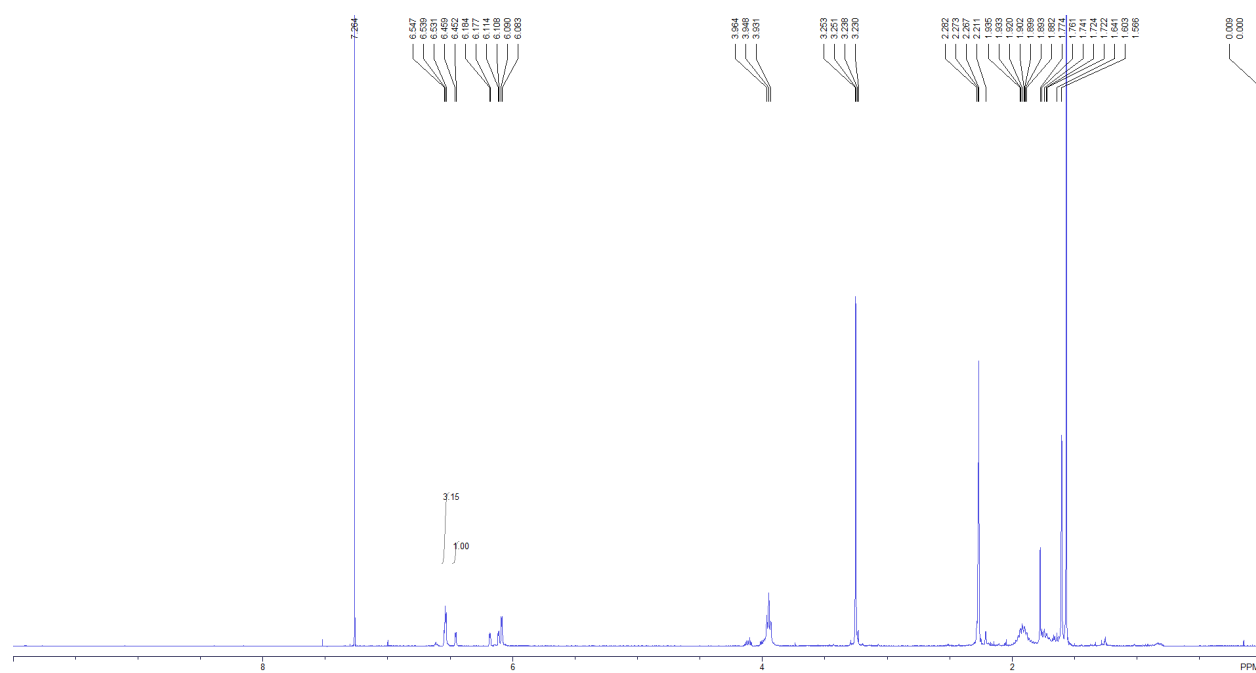

Initial Concentration = 1.0 mM

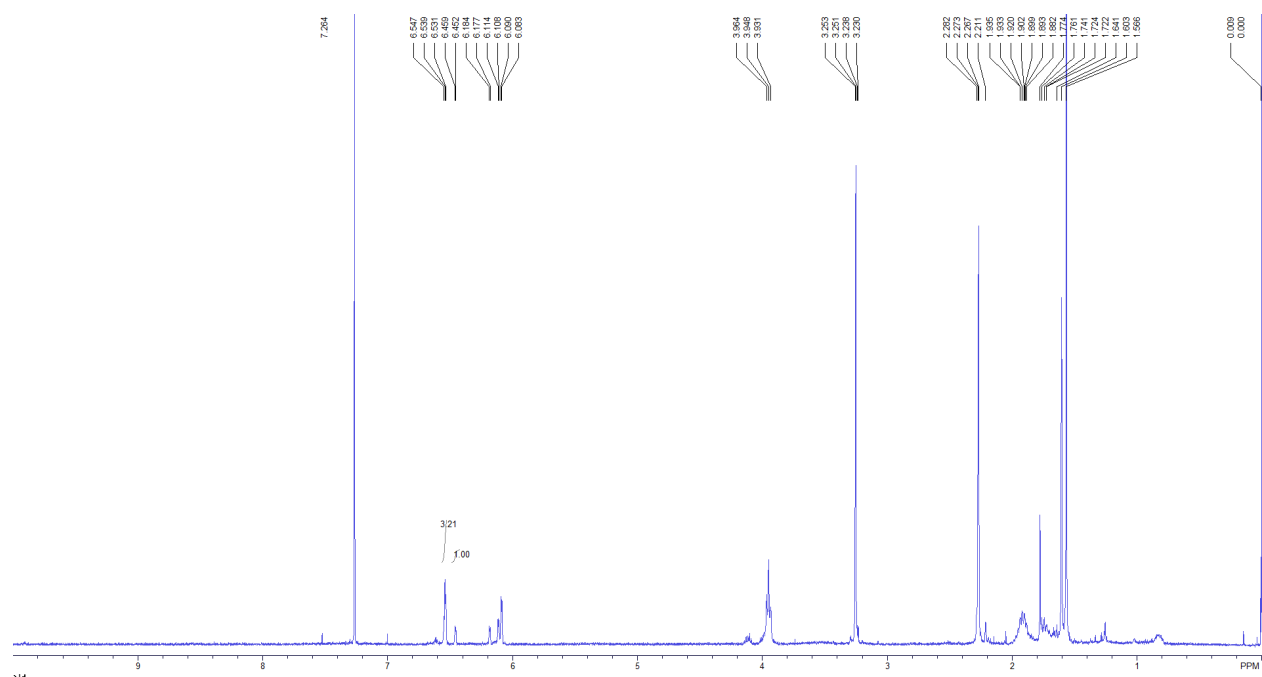

Initial Concentration = 0.5 mM

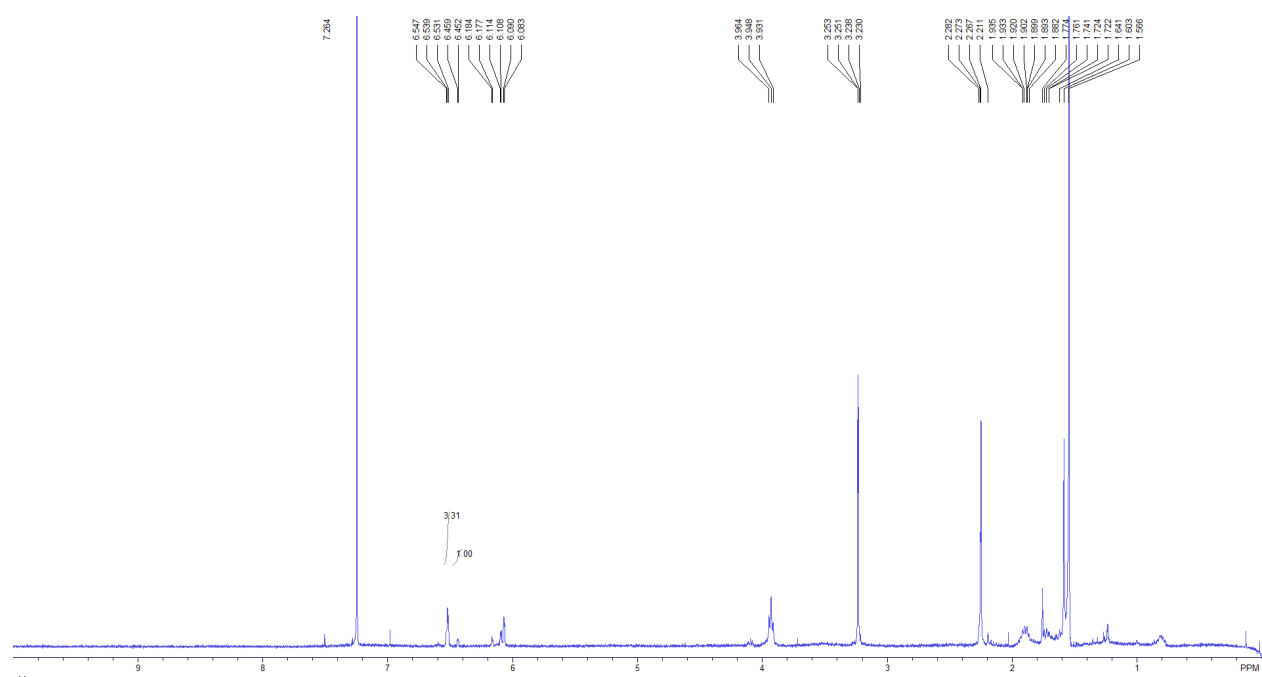

## Computational Details

All calculations were carried out at the wB97X-D/6-31G\* level of theory. A frequency calculation on the optimized structures confirmed the absence of any imaginary frequencies.

### Monomer 4C<sub>1</sub>

C2 symmetry

No. Imaginary Frequencies = 0

E = -1827.48311 H

**Table S1. Coordinates for Monomer 4C<sub>1</sub>**

| Center Number | Atomic Number | Atomic Type | Coordinates (Angstroms) |           |           |
|---------------|---------------|-------------|-------------------------|-----------|-----------|
|               |               |             | X                       | Y         | Z         |
| 1             | 8             | 0           | -2.030862               | 0.245651  | 3.810502  |
| 2             | 8             | 0           | 0.961729                | 1.219146  | -4.179652 |
| 3             | 8             | 0           | -2.755895               | 2.877467  | -2.059540 |
| 4             | 7             | 0           | -1.376252               | 1.053330  | -1.641828 |
| 5             | 7             | 0           | -0.117435               | 0.674945  | -2.186078 |
| 6             | 7             | 0           | -0.929972               | 2.334714  | -3.400092 |
| 7             | 6             | 0           | -1.757956               | 1.264489  | 4.768659  |
| 8             | 1             | 0           | -2.474950               | 1.079136  | 5.575429  |
| 9             | 1             | 0           | -1.993475               | 2.244007  | 4.334228  |
| 10            | 6             | 0           | 0.072770                | 1.401887  | -3.384354 |
| 11            | 6             | 0           | -1.816139               | 2.167817  | -2.331020 |
| 12            | 6             | 0           | -1.092287               | 3.327001  | -4.440599 |
| 13            | 1             | 0           | -0.165476               | 3.891783  | -4.559542 |
| 14            | 1             | 0           | -1.900118               | 3.990896  | -4.131445 |
| 15            | 1             | 0           | -1.346184               | 2.844999  | -5.387719 |
| 16            | 6             | 0           | -1.539233               | 0.889032  | -0.231164 |
| 17            | 6             | 0           | -2.354369               | -0.153411 | 0.224556  |
| 18            | 6             | 0           | -2.479061               | -0.338491 | 1.596221  |
| 19            | 1             | 0           | -3.111187               | -1.126477 | 1.993490  |
| 20            | 6             | 0           | -1.013796               | 1.536317  | 2.019314  |
| 21            | 1             | 0           | -0.476800               | 2.184332  | 2.701392  |
| 22            | 6             | 0           | -0.862244               | 1.736273  | 0.651226  |
| 23            | 6             | 0           | -3.125650               | -1.014438 | -0.741007 |
| 24            | 1             | 0           | -4.034275               | -0.495151 | -1.066126 |
| 25            | 1             | 0           | -3.423580               | -1.955741 | -0.270782 |
| 26            | 1             | 0           | -2.547068               | -1.234249 | -1.641747 |
| 27            | 6             | 0           | 0.000000                | 2.859735  | 0.141513  |
| 28            | 1             | 0           | 0.718480                | 2.503405  | -0.602557 |
| 29            | 1             | 0           | 0.563032                | 3.318915  | 0.957927  |
| 30            | 1             | 0           | -0.616270               | 3.636510  | -0.325940 |
| 31            | 6             | 0           | -1.822469               | 0.504135  | 2.494535  |

|    |   |   |           |           |           |
|----|---|---|-----------|-----------|-----------|
| 32 | 8 | 0 | 2.030862  | -0.245651 | 3.810502  |
| 33 | 8 | 0 | 2.755895  | -2.877467 | -2.059540 |
| 34 | 8 | 0 | -0.961729 | -1.219146 | -4.179652 |
| 35 | 7 | 0 | 1.376252  | -1.053330 | -1.641828 |
| 36 | 7 | 0 | 0.117435  | -0.674945 | -2.186078 |
| 37 | 7 | 0 | 0.929972  | -2.334714 | -3.400092 |
| 38 | 6 | 0 | 0.341361  | -1.251403 | 5.336937  |
| 39 | 1 | 0 | -0.400133 | -1.385358 | 4.544214  |
| 40 | 1 | 0 | 0.270640  | -2.131787 | 5.989378  |
| 41 | 6 | 0 | 1.757956  | -1.264489 | 4.768659  |
| 42 | 1 | 0 | 1.993475  | -2.244007 | 4.334228  |
| 43 | 1 | 0 | 2.474950  | -1.079136 | 5.575429  |
| 44 | 6 | 0 | -0.072770 | -1.401887 | -3.384354 |
| 45 | 6 | 0 | 1.816139  | -2.167817 | -2.331020 |
| 46 | 6 | 0 | 1.092287  | -3.327001 | -4.440599 |
| 47 | 1 | 0 | 1.900118  | -3.990896 | -4.131445 |
| 48 | 1 | 0 | 0.165476  | -3.891783 | -4.559542 |
| 49 | 1 | 0 | 1.346184  | -2.844999 | -5.387719 |
| 50 | 6 | 0 | 1.539233  | -0.889032 | -0.231164 |
| 51 | 6 | 0 | 0.862244  | -1.736273 | 0.651226  |
| 52 | 6 | 0 | 1.013796  | -1.536317 | 2.019314  |
| 53 | 1 | 0 | 0.476800  | -2.184332 | 2.701392  |
| 54 | 6 | 0 | 1.822469  | -0.504135 | 2.494535  |
| 55 | 6 | 0 | 2.479061  | 0.338491  | 1.596221  |
| 56 | 1 | 0 | 3.111187  | 1.126477  | 1.993490  |
| 57 | 6 | 0 | 2.354369  | 0.153411  | 0.224556  |
| 58 | 6 | 0 | 0.000000  | -2.859735 | 0.141513  |
| 59 | 1 | 0 | 0.616270  | -3.636510 | -0.325940 |
| 60 | 1 | 0 | -0.563032 | -3.318915 | 0.957927  |
| 61 | 1 | 0 | -0.718480 | -2.503405 | -0.602557 |
| 62 | 6 | 0 | 3.125650  | 1.014438  | -0.741007 |
| 63 | 1 | 0 | 2.547068  | 1.234249  | -1.641747 |
| 64 | 1 | 0 | 3.423580  | 1.955741  | -0.270782 |
| 65 | 1 | 0 | 4.034275  | 0.495151  | -1.066126 |
| 66 | 6 | 0 | -0.341361 | 1.251403  | 5.336937  |
| 67 | 1 | 0 | -0.270640 | 2.131787  | 5.989378  |
| 68 | 1 | 0 | 0.400133  | 1.385358  | 4.544214  |
| 69 | 6 | 0 | 0.000000  | 0.000000  | 6.156403  |
| 70 | 1 | 0 | 0.846766  | 0.228333  | 6.817209  |
| 71 | 1 | 0 | -0.846766 | -0.228333 | 6.817209  |

---

## Dimer 4C<sub>2</sub>

Ci symmetry

No. Imaginary Frequencies = 0

E = -3654.98911 H

**Table S2. Coordinates for Monomer 4C<sub>2</sub>**

| Center<br>Number | Atomic<br>Number | Atomic<br>Type | Coordinates (Angstroms) |           |            |
|------------------|------------------|----------------|-------------------------|-----------|------------|
|                  |                  |                | X                       | Y         | Z          |
| 1                | 8                | 0              | 1.748885                | -0.852190 | 3.613498   |
| 2                | 8                | 0              | 1.878597                | -0.827045 | -3.560039  |
| 3                | 8                | 0              | -0.592362               | 1.475989  | 11.507436  |
| 4                | 8                | 0              | 3.510035                | 1.517050  | 9.446660   |
| 5                | 8                | 0              | 3.835437                | 1.579814  | -9.318373  |
| 6                | 8                | 0              | -0.196113               | 1.541482  | -11.514800 |
| 7                | 7                | 0              | 1.527752                | 0.385923  | 9.008636   |
| 8                | 7                | 0              | 0.212202                | 0.541666  | 9.529102   |
| 9                | 7                | 0              | 1.597236                | 1.750371  | 10.756995  |
| 10               | 7                | 0              | 1.841659                | 0.443355  | -8.951876  |
| 11               | 7                | 0              | 0.543874                | 0.600091  | -9.514824  |
| 12               | 7                | 0              | 1.966841                | 1.816131  | -10.690509 |
| 13               | 6                | 0              | 1.743448                | 0.128872  | 2.589427   |
| 14               | 1                | 0              | 2.587483                | 0.819735  | 2.725679   |
| 15               | 1                | 0              | 0.815808                | 0.717399  | 2.624723   |
| 16               | 6                | 0              | 1.855594                | -0.633757 | 1.281862   |
| 17               | 1                | 0              | 1.031056                | -1.357342 | 1.239081   |
| 18               | 1                | 0              | 2.780042                | -1.222614 | 1.304352   |
| 19               | 6                | 0              | 1.830501                | 0.243166  | 0.030840   |
| 20               | 1                | 0              | 0.914117                | 0.848869  | 0.016755   |
| 21               | 1                | 0              | 2.671307                | 0.949172  | 0.048417   |
| 22               | 6                | 0              | 1.900429                | -0.624677 | -1.224790  |
| 23               | 1                | 0              | 2.825766                | -1.212534 | -1.218978  |
| 24               | 1                | 0              | 1.075733                | -1.349295 | -1.216082  |
| 25               | 6                | 0              | 1.833524                | 0.146954  | -2.530220  |
| 26               | 1                | 0              | 0.906150                | 0.733431  | -2.595009  |
| 27               | 1                | 0              | 2.680136                | 0.840740  | -2.631044  |
| 28               | 6                | 0              | 0.308152                | 1.288576  | 10.726223  |
| 29               | 6                | 0              | 2.361685                | 1.239622  | 9.702335   |
| 30               | 6                | 0              | 2.123629                | 2.604404  | 11.799855  |
| 31               | 1                | 0              | 1.494448                | 3.490655  | 11.903711  |
| 32               | 1                | 0              | 3.132675                | 2.892254  | 11.503360  |
| 33               | 1                | 0              | 2.152296                | 2.067593  | 12.751054  |
| 34               | 6                | 0              | 1.638141                | 0.124384  | 7.608857   |
| 35               | 6                | 0              | 1.960607                | -1.178060 | 7.208632   |



|    |   |   |           |           |            |
|----|---|---|-----------|-----------|------------|
| 36 | 6 | 0 | 1.993411  | -1.455652 | 5.848854   |
| 37 | 1 | 0 | 2.232366  | -2.451982 | 5.490606   |
| 38 | 6 | 0 | 1.435352  | 0.840049  | 5.326136   |
| 39 | 1 | 0 | 1.216356  | 1.620352  | 4.606181   |
| 40 | 6 | 0 | 1.378393  | 1.140686  | 6.684598   |
| 41 | 6 | 0 | 2.304727  | -2.238726 | 8.220689   |
| 42 | 1 | 0 | 3.322800  | -2.085984 | 8.596060   |
| 43 | 1 | 0 | 2.254154  | -3.234783 | 7.772338   |
| 44 | 1 | 0 | 1.640534  | -2.206178 | 9.088018   |
| 45 | 6 | 0 | 0.678204  | 1.352148  | -10.704776 |
| 46 | 6 | 0 | 2.696682  | 1.301729  | -9.613327  |
| 47 | 6 | 0 | 2.526254  | 2.675950  | -11.711184 |
| 48 | 1 | 0 | 2.591809  | 2.142477  | -12.662447 |
| 49 | 1 | 0 | 3.522591  | 2.967662  | -11.377737 |
| 50 | 1 | 0 | 1.896796  | 3.559445  | -11.834829 |
| 51 | 6 | 0 | 1.905631  | 0.174027  | -7.550710  |
| 52 | 6 | 0 | 1.614475  | 1.184804  | -6.629820  |
| 53 | 6 | 0 | 1.624749  | 0.876009  | -5.271997  |
| 54 | 1 | 0 | 1.381391  | 1.652133  | -4.555370  |
| 55 | 6 | 0 | 1.899617  | -0.424511 | -4.855013  |
| 56 | 6 | 0 | 2.200533  | -1.416591 | -5.789116  |
| 57 | 1 | 0 | 2.426866  | -2.415142 | -5.428875  |
| 58 | 6 | 0 | 2.214204  | -1.130892 | -7.147496  |
| 59 | 6 | 0 | 1.310879  | 2.585430  | -7.089465  |
| 60 | 1 | 0 | 2.208446  | 3.055532  | -7.507634  |
| 61 | 1 | 0 | 0.958364  | 3.200381  | -6.257779  |
| 62 | 1 | 0 | 0.535288  | 2.589893  | -7.861439  |
| 63 | 6 | 0 | 2.592033  | -2.185593 | -8.153793  |
| 64 | 1 | 0 | 1.955486  | -2.149497 | -9.041543  |
| 65 | 1 | 0 | 2.529032  | -3.184107 | -7.712538  |
| 66 | 1 | 0 | 3.621175  | -2.029253 | -8.496025  |
| 67 | 6 | 0 | 1.057954  | 2.538269  | 7.142057   |
| 68 | 1 | 0 | 0.252897  | 2.537378  | 7.883325   |
| 69 | 1 | 0 | 0.738072  | 3.159248  | 6.301708   |
| 70 | 1 | 0 | 1.938736  | 3.005206  | 7.597728   |
| 71 | 6 | 0 | 1.724808  | -0.457903 | 4.911017   |
| 72 | 8 | 0 | -1.748885 | 0.852190  | -3.613498  |
| 73 | 8 | 0 | -1.878597 | 0.827045  | 3.560039   |
| 74 | 8 | 0 | 0.592362  | -1.475989 | -11.507436 |
| 75 | 8 | 0 | -3.510035 | -1.517050 | -9.446660  |
| 76 | 8 | 0 | -3.835437 | -1.579814 | 9.318373   |
| 77 | 8 | 0 | 0.196113  | -1.541482 | 11.514800  |
| 78 | 7 | 0 | -1.527752 | -0.385923 | -9.008636  |
| 79 | 7 | 0 | -0.212202 | -0.541666 | -9.529102  |
| 80 | 7 | 0 | -1.597236 | -1.750371 | -10.756995 |
| 81 | 7 | 0 | -1.841659 | -0.443355 | 8.951876   |
| 82 | 7 | 0 | -0.543874 | -0.600091 | 9.514824   |
| 83 | 7 | 0 | -1.966841 | -1.816131 | 10.690509  |

|     |   |   |           |           |            |
|-----|---|---|-----------|-----------|------------|
| 84  | 6 | 0 | -1.743448 | -0.128872 | -2.589427  |
| 85  | 1 | 0 | -2.587483 | -0.819735 | -2.725679  |
| 86  | 1 | 0 | -0.815808 | -0.717399 | -2.624723  |
| 87  | 6 | 0 | -1.855594 | 0.633757  | -1.281862  |
| 88  | 1 | 0 | -1.031056 | 1.357342  | -1.239081  |
| 89  | 1 | 0 | -2.780042 | 1.222614  | -1.304352  |
| 90  | 6 | 0 | -1.830501 | -0.243166 | -0.030840  |
| 91  | 1 | 0 | -0.914117 | -0.848869 | -0.016755  |
| 92  | 1 | 0 | -2.671307 | -0.949172 | -0.048417  |
| 93  | 6 | 0 | -1.900429 | 0.624677  | 1.224790   |
| 94  | 1 | 0 | -2.825766 | 1.212534  | 1.218978   |
| 95  | 1 | 0 | -1.075733 | 1.349295  | 1.216082   |
| 96  | 6 | 0 | -1.833524 | -0.146954 | 2.530220   |
| 97  | 1 | 0 | -0.906150 | -0.733431 | 2.595009   |
| 98  | 1 | 0 | -2.680136 | -0.840740 | 2.631044   |
| 99  | 6 | 0 | -0.308152 | -1.288576 | -10.726223 |
| 100 | 6 | 0 | -2.361685 | -1.239622 | -9.702335  |
| 101 | 6 | 0 | -2.123629 | -2.604404 | -11.799855 |
| 102 | 1 | 0 | -1.494448 | -3.490655 | -11.903711 |
| 103 | 1 | 0 | -3.132675 | -2.892254 | -11.503360 |
| 104 | 1 | 0 | -2.152296 | -2.067593 | -12.751054 |
| 105 | 6 | 0 | -1.638141 | -0.124384 | -7.608857  |
| 106 | 6 | 0 | -1.960607 | 1.178060  | -7.208632  |
| 107 | 6 | 0 | -1.993411 | 1.455652  | -5.848854  |
| 108 | 1 | 0 | -2.232366 | 2.451982  | -5.490606  |
| 109 | 6 | 0 | -1.435352 | -0.840049 | -5.326136  |
| 110 | 1 | 0 | -1.216356 | -1.620352 | -4.606181  |
| 111 | 6 | 0 | -1.378393 | -1.140686 | -6.684598  |
| 112 | 6 | 0 | -2.304727 | 2.238726  | -8.220689  |
| 113 | 1 | 0 | -3.322800 | 2.085984  | -8.596060  |
| 114 | 1 | 0 | -2.254154 | 3.234783  | -7.772338  |
| 115 | 1 | 0 | -1.640534 | 2.206178  | -9.088018  |
| 116 | 6 | 0 | -0.678204 | -1.352148 | 10.704776  |
| 117 | 6 | 0 | -2.696682 | -1.301729 | 9.613327   |
| 118 | 6 | 0 | -2.526254 | -2.675950 | 11.711184  |
| 119 | 1 | 0 | -2.591809 | -2.142477 | 12.662447  |
| 120 | 1 | 0 | -3.522591 | -2.967662 | 11.377737  |
| 121 | 1 | 0 | -1.896796 | -3.559445 | 11.834829  |
| 122 | 6 | 0 | -1.905631 | -0.174027 | 7.550710   |
| 123 | 6 | 0 | -1.614475 | -1.184804 | 6.629820   |
| 124 | 6 | 0 | -1.624749 | -0.876009 | 5.271997   |
| 125 | 1 | 0 | -1.381391 | -1.652133 | 4.555370   |
| 126 | 6 | 0 | -1.899617 | 0.424511  | 4.855013   |
| 127 | 6 | 0 | -2.200533 | 1.416591  | 5.789116   |
| 128 | 1 | 0 | -2.426866 | 2.415142  | 5.428875   |
| 129 | 6 | 0 | -2.214204 | 1.130892  | 7.147496   |
| 130 | 6 | 0 | -1.310879 | -2.585430 | 7.089465   |
| 131 | 1 | 0 | -2.208446 | -3.055532 | 7.507634   |

|     |   |   |           |           |           |
|-----|---|---|-----------|-----------|-----------|
| 132 | 1 | 0 | -0.958364 | -3.200381 | 6.257779  |
| 133 | 1 | 0 | -0.535288 | -2.589893 | 7.861439  |
| 134 | 6 | 0 | -2.592033 | 2.185593  | 8.153793  |
| 135 | 1 | 0 | -1.955486 | 2.149497  | 9.041543  |
| 136 | 1 | 0 | -2.529032 | 3.184107  | 7.712538  |
| 137 | 1 | 0 | -3.621175 | 2.029253  | 8.496025  |
| 138 | 6 | 0 | -1.057954 | -2.538269 | -7.142057 |
| 139 | 1 | 0 | -0.252897 | -2.537378 | -7.883325 |
| 140 | 1 | 0 | -0.738072 | -3.159248 | -6.301708 |
| 141 | 1 | 0 | -1.938736 | -3.005206 | -7.597728 |
| 142 | 6 | 0 | -1.724808 | 0.457903  | -4.911017 |

---

# General Information for Crystal Structures

The diffraction data were collected on a Rigaku XtaLAB Synergy-S Dualflex HyPix diffractometer with monochromated Cu-K $\alpha$  radiation. The structure was solved by direct methods (OLEX2.solve)<sup>1,2</sup> and refined by full-matrix least-squares on F<sup>2</sup> values (SHELXL).<sup>3</sup> All the heavy atoms were refined anisotropically. The hydrogen atoms were localized from the difference electron density maps, after which they were refined isotropically (U<sub>iso</sub> with a factor of 1.2 for CH and CH<sub>2</sub> groups, 1.5 for CH<sub>3</sub> groups) with riding coordinates or as rotation CH<sub>3</sub> groups. Mercury was used for the structure presentation in the Figures.<sup>4</sup>

# Crystal Structure Data for Dimer 4a<sub>2</sub>

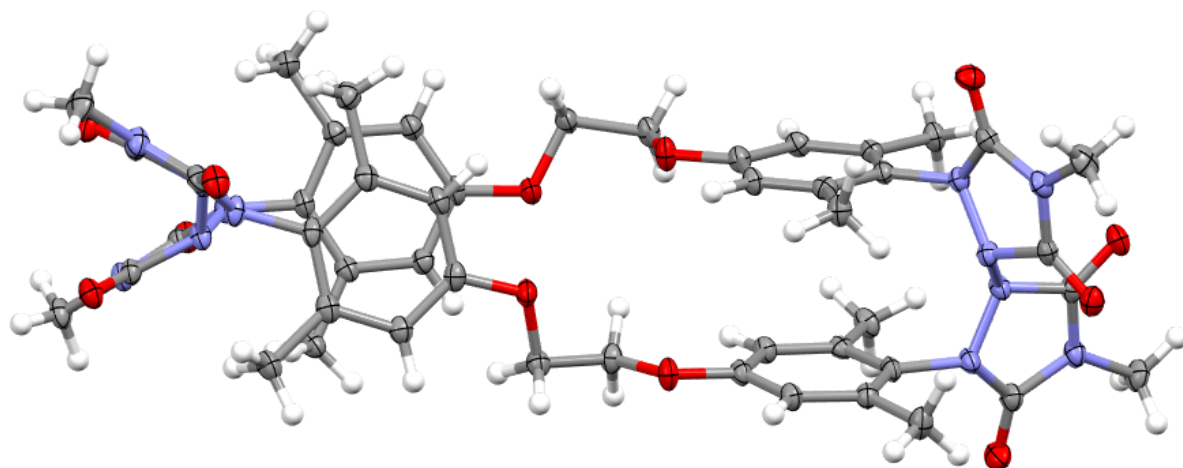

\*ellipsoids represent 50% probability level

**Table S3. Crystal data and structure refinement for 4a<sub>2</sub>.**

|                                    |                                                                                 |
|------------------------------------|---------------------------------------------------------------------------------|
| Identification code                | GB2020_Dec                                                                      |
| Empirical formula                  | C <sub>49</sub> H <sub>54</sub> Cl <sub>2</sub> N <sub>12</sub> O <sub>12</sub> |
| Formula weight                     | 1073.94                                                                         |
| Temperature/K                      | 100.15                                                                          |
| Crystal system                     | monoclinic                                                                      |
| Space group                        | P2 <sub>1</sub>                                                                 |
| a/Å                                | 8.83819(7)                                                                      |
| b/Å                                | 14.23369(11)                                                                    |
| c/Å                                | 20.10392(16)                                                                    |
| α/°                                | 90                                                                              |
| β/°                                | 91.7994(7)                                                                      |
| γ/°                                | 90                                                                              |
| Volume/Å <sup>3</sup>              | 2527.83(3)                                                                      |
| Z                                  | 2                                                                               |
| ρ <sub>calc</sub> /cm <sup>3</sup> | 1.411                                                                           |
| μ/mm <sup>-1</sup>                 | 1.792                                                                           |
| F(000)                             | 1124.0                                                                          |
| Crystal size/mm <sup>3</sup>       | 0.33 × 0.13 × 0.1                                                               |
| Radiation                          | CuKα (λ = 1.54184)                                                              |

$2\Theta$  range for data collection/ $^{\circ}$  4.398 to 155.172  
 Index ranges  $-11 \leq h \leq 10, -18 \leq k \leq 18, -24 \leq l \leq 24$   
 Reflections collected 35964  
 Independent reflections 10128 [ $R_{\text{int}} = 0.0441, R_{\text{sigma}} = 0.0387$ ]  
 Data/restraints/parameters 10128/1/689  
 Goodness-of-fit on  $F^2$  1.035  
 Final R indexes [ $I \geq 2\sigma(I)$ ]  $R_1 = 0.0338, wR_2 = 0.0885$   
 Final R indexes [all data]  $R_1 = 0.0353, wR_2 = 0.0896$   
 Largest diff. peak/hole /  $e \text{ \AA}^{-3}$  0.50/-0.37  
 Flack parameter 0.491(13)

**Table S4. Fractional Atomic Coordinates ( $\times 10^4$ ) and Equivalent Isotropic Displacement Parameters ( $\text{\AA}^2 \times 10^3$ ) for  $4a_2$ .  $U_{\text{eq}}$  is defined as 1/3 of the trace of the orthogonalised  $U_{ij}$  tensor.**

| Atom | <i>x</i>    | <i>y</i>     | <i>z</i>     | $U(\text{eq})$ |
|------|-------------|--------------|--------------|----------------|
| C11  | 4557.6 (9)  | 12871.1 (7)  | -1928.1 (4)  | 44.87 (19)     |
| C12  | 6423.8 (10) | 11623.6 (6)  | -2730.1 (4)  | 42.27 (18)     |
| C49  | 6395 (4)    | 12446 (2)    | -2067.1 (16) | 36.4 (7)       |
| O1   | 5563 (2)    | 9820.9 (14)  | 593.9 (10)   | 29.0 (4)       |
| O2   | 942 (2)     | 8333.5 (13)  | 525.1 (9)    | 25.5 (4)       |
| O3   | 2924 (2)    | 6610.6 (14)  | 578.6 (9)    | 25.9 (4)       |
| O4   | 229 (2)     | 6182.6 (13)  | -1380.1 (10) | 26.5 (4)       |
| O5   | 3703 (2)    | 8955.4 (13)  | -3344.9 (9)  | 25.4 (4)       |
| O6   | 5315.1 (19) | 10178.1 (14) | -4206.5 (9)  | 23.1 (4)       |
| O7   | 9067 (2)    | 11735.4 (13) | -6629.5 (9)  | 24.8 (4)       |
| O8   | 11956 (2)   | 9185.9 (13)  | -7148.6 (9)  | 25.3 (4)       |
| O9   | 9014 (2)    | 8881.3 (14)  | -7923.7 (10) | 30.6 (4)       |
| O10  | 9726 (2)    | 6155.5 (13)  | -6730.2 (10) | 27.9 (4)       |
| O11  | 7931 (2)    | 8140.1 (13)  | -3802.5 (9)  | 24.1 (4)       |
| O12  | 7901 (2)    | 8374.7 (13)  | -2337.3 (9)  | 23.7 (4)       |
| N1   | 4537 (2)    | 8630.7 (15)  | -70.0 (10)   | 20.9 (4)       |
| N2   | 3127 (2)    | 9234.6 (16)  | 715.3 (11)   | 22.7 (4)       |
| N3   | 2991 (2)    | 8329.0 (15)  | -172.0 (10)  | 19.5 (4)       |
| N4   | 2820 (2)    | 7433.2 (14)  | -425.9 (10)  | 19.1 (4)       |
| N5   | 1467 (2)    | 6135.3 (15)  | -345.4 (11)  | 22.5 (4)       |
| N6   | 1774 (2)    | 7390.7 (15)  | -985.9 (10)  | 19.1 (4)       |
| N7   | 8730 (2)    | 10135.5 (15) | -6483.9 (10) | 20.3 (4)       |
| N8   | 10827 (2)   | 10637.0 (15) | -6963.0 (10) | 20.8 (4)       |
| N9   | 9746 (2)    | 9356.5 (14)  | -6558.4 (10) | 19.2 (4)       |

**Table S4. Fractional Atomic Coordinates ( $\times 10^4$ ) and Equivalent Isotropic Displacement Parameters ( $\text{\AA}^2 \times 10^3$ ) for  $4a_2$ .  $U_{eq}$  is defined as 1/3 of the trace of the orthogonalised  $U_{ij}$  tensor.**

| Atom | <i>x</i>  | <i>y</i>     | <i>z</i>     | $U(eq)$  |
|------|-----------|--------------|--------------|----------|
| N10  | 9029 (2)  | 8543.6 (15)  | -6789.1 (10) | 21.2 (4) |
| N11  | 9364 (3)  | 7369.7 (16)  | -7496.8 (11) | 25.2 (5) |
| N12  | 9512 (2)  | 7721.1 (15)  | -6425.9 (10) | 21.5 (4) |
| C1   | 4547 (3)  | 9290.3 (18)  | 430.7 (13)   | 22.2 (5) |
| C2   | 2716 (3)  | 9761 (2)     | 1306.7 (13)  | 27.2 (5) |
| C3   | 2198 (3)  | 8604.3 (18)  | 391.3 (12)   | 20.6 (5) |
| C4   | 2439 (3)  | 6697.0 (18)  | 12.7 (12)    | 20.6 (5) |
| C5   | 946 (3)   | 5215 (2)     | -132.7 (16)  | 31.6 (6) |
| C6   | 1057 (3)  | 6528.1 (18)  | -960.0 (13)  | 21.3 (5) |
| C7   | 2254 (3)  | 7803.4 (18)  | -1597.2 (12) | 18.9 (4) |
| C8   | 3301 (3)  | 7320.6 (18)  | -1985.2 (13) | 20.5 (5) |
| C9   | 3896 (3)  | 6371.8 (17)  | -1783.0 (13) | 24.0 (5) |
| C10  | 3755 (3)  | 7744.1 (18)  | -2564.6 (12) | 20.8 (5) |
| C11  | 3182 (3)  | 8618.9 (18)  | -2756.5 (12) | 21.1 (5) |
| C12  | 2156 (3)  | 9090.8 (18)  | -2368.1 (13) | 20.8 (5) |
| C13  | 1685 (3)  | 8680.2 (17)  | -1773.2 (12) | 19.3 (5) |
| C14  | 599 (3)   | 9209.8 (18)  | -1347.7 (13) | 22.4 (5) |
| C15  | 3165 (3)  | 9848.4 (18)  | -3564.0 (13) | 23.3 (5) |
| C16  | 3723 (3)  | 9998.3 (19)  | -4252.0 (13) | 22.7 (5) |
| C17  | 6067 (3)  | 10181.8 (18) | -4791.6 (13) | 21.1 (5) |
| C18  | 5396 (3)  | 10058.5 (18) | -5413.6 (13) | 21.8 (5) |
| C19  | 6278 (3)  | 10044.2 (18) | -5981.9 (13) | 21.2 (5) |
| C20  | 5534 (3)  | 9947 (2)     | -6662.6 (14) | 27.8 (6) |
| C21  | 7839 (3)  | 10151.5 (17) | -5896.8 (12) | 20.2 (5) |
| C22  | 8536 (3)  | 10302.2 (16) | -5270.5 (12) | 19.9 (5) |
| C23  | 10221 (3) | 10440.9 (18) | -5180.7 (13) | 22.0 (5) |
| C24  | 7632 (3)  | 10322.1 (17) | -4718.6 (12) | 19.9 (5) |
| C25  | 9477 (3)  | 10936.6 (17) | -6686.1 (12) | 19.6 (5) |
| C26  | 11887 (3) | 11276.2 (19) | -7265.0 (13) | 25.3 (5) |
| C27  | 10983 (3) | 9684.7 (18)  | -6928.9 (12) | 19.9 (5) |
| C28  | 9131 (3)  | 8321.3 (19)  | -7475.3 (13) | 23.2 (5) |
| C29  | 9457 (4)  | 6839 (2)     | -8113.2 (14) | 32.6 (6) |
| C30  | 9551 (3)  | 6984.5 (18)  | -6862.0 (14) | 23.3 (5) |
| C31  | 9134 (3)  | 7701.0 (17)  | -5735.9 (12) | 20.5 (5) |
| C32  | 7612 (3)  | 7625.4 (17)  | -5566.0 (13) | 21.7 (5) |
| C33  | 6372 (3)  | 7464.8 (19)  | -6082.1 (14) | 26.4 (5) |
| C34  | 7276 (3)  | 7746.9 (18)  | -4903.5 (13) | 22.2 (5) |
| C35  | 8410 (3)  | 7964.0 (18)  | -4432.2 (13) | 22.1 (5) |

**Table S4. Fractional Atomic Coordinates ( $\times 10^4$ ) and Equivalent Isotropic Displacement Parameters ( $\text{\AA}^2 \times 10^3$ ) for 4a<sub>2</sub>.  $U_{\text{eq}}$  is defined as 1/3 of the trace of the orthogonalised  $U_{ij}$  tensor.**

| Atom | <i>x</i>  | <i>y</i>     | <i>z</i>     | $U(\text{eq})$ |
|------|-----------|--------------|--------------|----------------|
| C36  | 9926 (3)  | 7987.1 (18)  | -4605.0 (13) | 22.1 (5)       |
| C37  | 10299 (3) | 7856.2 (18)  | -5269.2 (13) | 22.2 (5)       |
| C38  | 11936 (3) | 7882 (2)     | -5464.3 (14) | 25.3 (5)       |
| C39  | 8888 (3)  | 8721.1 (18)  | -3385.4 (12) | 22.7 (5)       |
| C40  | 7935 (3)  | 9091.8 (18)  | -2835.3 (13) | 22.9 (5)       |
| C41  | 7088 (3)  | 8524.6 (18)  | -1781.3 (12) | 20.1 (5)       |
| C42  | 6161 (3)  | 9298.5 (18)  | -1687.4 (12) | 20.2 (5)       |
| C43  | 5324 (3)  | 9359.2 (17)  | -1110.0 (12) | 19.2 (5)       |
| C44  | 4325 (3)  | 10196.4 (18) | -1013.0 (14) | 24.2 (5)       |
| C45  | 5473 (3)  | 8645.0 (18)  | -637.9 (12)  | 19.4 (5)       |
| C46  | 6465 (3)  | 7889.3 (18)  | -712.8 (12)  | 21.1 (5)       |
| C47  | 6684 (3)  | 7146 (2)     | -183.6 (14)  | 27.7 (6)       |
| C48  | 7268 (3)  | 7834.9 (18)  | -1293.4 (12) | 22.0 (5)       |

**Table S5. Anisotropic Displacement Parameters ( $\text{\AA}^2 \times 10^3$ ) for 4a<sub>2</sub>. The Anisotropic displacement factor exponent takes the form:  $-2\pi^2[h^2a^2U_{11}+2hka*b*U_{12}+\dots]$ .**

| Atom | $U_{11}$  | $U_{22}$  | $U_{33}$  | $U_{23}$  | $U_{13}$ | $U_{12}$  |
|------|-----------|-----------|-----------|-----------|----------|-----------|
| Cl1  | 37.9 (4)  | 51.7 (5)  | 45.1 (4)  | -1.7 (4)  | 3.1 (3)  | 2.4 (3)   |
| Cl2  | 50.5 (4)  | 36.7 (4)  | 39.4 (4)  | 0.5 (3)   | -0.3 (3) | 5.3 (3)   |
| C49  | 37.3 (16) | 38.8 (17) | 33.1 (16) | 3.6 (12)  | 0.0 (12) | -3.1 (12) |
| O1   | 29.1 (10) | 31.6 (10) | 26.6 (10) | -10.8 (8) | 4.7 (7)  | -4.9 (8)  |
| O2   | 23.1 (9)  | 25.5 (9)  | 28.6 (9)  | 0.2 (7)   | 10.4 (7) | 1.2 (7)   |
| O3   | 29.1 (9)  | 27.0 (9)  | 21.9 (9)  | 3.7 (7)   | 4.1 (7)  | 4.2 (8)   |
| O4   | 24.7 (9)  | 23.7 (9)  | 31.0 (10) | 0.2 (8)   | -1.0 (7) | -5.0 (7)  |
| O5   | 29.9 (9)  | 23.7 (9)  | 23.2 (9)  | 6.2 (7)   | 11.9 (7) | 6.6 (7)   |
| O6   | 19.8 (8)  | 29.9 (9)  | 19.9 (9)  | 0.9 (7)   | 5.4 (6)  | 0.4 (7)   |
| O7   | 28.9 (9)  | 18.7 (9)  | 27.1 (9)  | 1.0 (7)   | 5.4 (7)  | 2.3 (7)   |
| O8   | 25.1 (9)  | 23.2 (9)  | 28.1 (10) | -2.3 (7)  | 9.2 (7)  | 0.3 (7)   |
| O9   | 42.5 (11) | 28.1 (10) | 21.5 (9)  | 1.7 (8)   | 4.0 (8)  | -4.7 (8)  |
| O10  | 33.6 (10) | 19.2 (9)  | 31.3 (10) | -2.4 (7)  | 8.5 (8)  | -2.7 (7)  |
| O11  | 25.2 (9)  | 29.3 (9)  | 18.3 (9)  | -1.9 (7)  | 6.8 (7)  | -3.9 (7)  |
| O12  | 28.8 (9)  | 21.7 (9)  | 21.3 (9)  | 1.7 (7)   | 11.2 (7) | 4.1 (7)   |
| N1   | 18.8 (10) | 23.6 (10) | 20.7 (10) | -4.4 (8)  | 6.4 (8)  | -3.6 (8)  |
| N2   | 24.0 (10) | 23.4 (10) | 21.1 (11) | -4.3 (8)  | 6.8 (8)  | 1.7 (9)   |
| N3   | 19.6 (10) | 18.1 (10) | 21.1 (10) | -3.0 (8)  | 6.7 (8)  | -2.6 (8)  |
| N4   | 21.5 (10) | 17.3 (9)  | 18.6 (10) | -1.0 (8)  | 3.1 (8)  | -1.1 (8)  |



**Table S5. Anisotropic Displacement Parameters ( $\text{\AA}^2 \times 10^3$ ) for 4a2. The Anisotropic displacement factor exponent takes the form:  $-2\pi^2[h^2a^{*2}U_{11}+2hka^*b^*U_{12}+\dots]$ .**

| Atom | $U_{11}$  | $U_{22}$  | $U_{33}$  | $U_{23}$  | $U_{13}$ | $U_{12}$  |
|------|-----------|-----------|-----------|-----------|----------|-----------|
| N5   | 22.5 (10) | 18.9 (10) | 26.2 (11) | 3.4 (8)   | 4.1 (8)  | -2.5 (8)  |
| N6   | 19.6 (10) | 18.2 (9)  | 19.6 (10) | 1.8 (8)   | 3.1 (8)  | -1.8 (8)  |
| N7   | 22.5 (10) | 18.0 (10) | 20.7 (10) | 0.1 (8)   | 6.5 (8)  | 1.5 (8)   |
| N8   | 22.4 (10) | 18.4 (10) | 22.0 (10) | 0.7 (8)   | 7.1 (8)  | -1.2 (8)  |
| N9   | 22.1 (10) | 14.5 (9)  | 21.5 (10) | -2.3 (8)  | 7.2 (8)  | -1.5 (8)  |
| N10  | 27.1 (11) | 17.2 (10) | 19.6 (10) | -0.3 (8)  | 4.6 (8)  | -3.0 (8)  |
| N11  | 31.0 (12) | 23.8 (10) | 21.2 (11) | -3.3 (9)  | 6.3 (9)  | -4.9 (9)  |
| N12  | 30.3 (11) | 15.8 (10) | 18.8 (10) | 0.5 (8)   | 6.7 (8)  | -1.1 (8)  |
| C1   | 23.6 (12) | 22.0 (12) | 21.2 (12) | -2.3 (10) | 4.2 (9)  | 1.4 (10)  |
| C2   | 32.5 (14) | 27.7 (13) | 21.6 (13) | -7.1 (10) | 7.5 (10) | 2.4 (11)  |
| C3   | 22.2 (12) | 19.6 (11) | 20.3 (11) | -0.3 (9)  | 5.1 (9)  | 4.6 (9)   |
| C4   | 19.4 (11) | 21.0 (11) | 21.7 (12) | 1.6 (9)   | 7.1 (9)  | 2.7 (9)   |
| C5   | 32.6 (14) | 23.0 (13) | 39.4 (17) | 10.2 (11) | 5.6 (12) | -6.3 (11) |
| C6   | 19.3 (11) | 19.0 (11) | 25.8 (12) | 0.1 (10)  | 5.8 (9)  | 0.5 (9)   |
| C7   | 18.9 (11) | 20.6 (11) | 17.3 (11) | -0.4 (9)  | 3.1 (8)  | -3.2 (9)  |
| C8   | 19.9 (11) | 18.6 (11) | 23.0 (12) | -2.4 (9)  | 0.5 (9)  | -0.7 (9)  |
| C9   | 28.8 (13) | 19.0 (12) | 24.7 (13) | 1.5 (9)   | 7.0 (10) | 3.8 (10)  |
| C10  | 21.4 (11) | 20.1 (11) | 21.2 (12) | -1.1 (9)  | 6.5 (9)  | 1.7 (9)   |
| C11  | 20.7 (11) | 21.8 (12) | 21.2 (12) | 1.7 (9)   | 4.5 (9)  | -0.9 (9)  |
| C12  | 19.9 (11) | 19.5 (11) | 23.0 (12) | 1.9 (9)   | 1.7 (9)  | 1.5 (9)   |
| C13  | 17.0 (11) | 19.9 (11) | 21.1 (11) | -0.9 (9)  | 3.4 (9)  | -0.6 (9)  |
| C14  | 22.6 (12) | 21.4 (12) | 23.4 (12) | 1.6 (9)   | 6.4 (9)  | 2.2 (10)  |
| C15  | 21.7 (12) | 22.4 (12) | 26.1 (13) | 4.2 (10)  | 8.1 (10) | 3.2 (9)   |
| C16  | 19.1 (11) | 26.6 (13) | 22.6 (12) | 3.1 (10)  | 4.9 (9)  | 0.9 (9)   |
| C17  | 23.3 (12) | 18.6 (11) | 21.7 (12) | 2.6 (9)   | 7.5 (9)  | 1.3 (9)   |
| C18  | 19.2 (11) | 22.9 (12) | 23.6 (12) | 3.5 (9)   | 4.6 (9)  | 0.6 (9)   |
| C19  | 21.0 (12) | 21.0 (11) | 21.7 (12) | 1.4 (9)   | 2.5 (9)  | -0.7 (9)  |
| C20  | 23.5 (12) | 37.3 (15) | 22.7 (13) | 1.5 (11)  | 2.2 (10) | -2.2 (11) |
| C21  | 20.8 (11) | 18.4 (11) | 21.7 (12) | 0.9 (9)   | 7.6 (9)  | 0.2 (9)   |
| C22  | 20.7 (11) | 15.5 (11) | 23.6 (12) | -1.3 (9)  | 4.7 (9)  | -1.0 (9)  |
| C23  | 19.5 (12) | 22.3 (12) | 24.5 (13) | -2.0 (10) | 3.8 (9)  | -1.1 (9)  |
| C24  | 20.7 (11) | 18.5 (11) | 20.5 (12) | -1.0 (9)  | 2.5 (9)  | -0.1 (9)  |
| C25  | 19.4 (11) | 20.7 (12) | 18.8 (11) | 0.5 (9)   | 2.4 (9)  | -1.1 (9)  |
| C26  | 28.3 (13) | 22.5 (12) | 25.6 (13) | 0.4 (10)  | 9.4 (10) | -6.9 (10) |
| C27  | 22.0 (12) | 20.0 (11) | 18.2 (11) | 0.1 (9)   | 5.2 (9)  | -3.1 (9)  |
| C28  | 26.7 (12) | 24.4 (12) | 18.8 (12) | -1.4 (10) | 5.4 (9)  | -4.3 (10) |
| C29  | 44.1 (16) | 29.9 (15) | 24.2 (14) | -9.2 (11) | 6.0 (12) | -4.9 (12) |
| C30  | 23.1 (12) | 20.1 (12) | 26.8 (13) | -2.8 (10) | 5.8 (10) | -5.0 (9)  |
| C31  | 27.3 (12) | 15.5 (11) | 19.3 (12) | -0.1 (9)  | 7.2 (9)  | -1.7 (9)  |

**Table S5. Anisotropic Displacement Parameters ( $\text{\AA}^2 \times 10^3$ ) for 4a<sub>2</sub>. The Anisotropic displacement factor exponent takes the form:  $-2\pi^2[h^2a^{*2}U_{11}+2hka^*b^*U_{12}+\dots]$ .**

| Atom | U <sub>11</sub> | U <sub>22</sub> | U <sub>33</sub> | U <sub>23</sub> | U <sub>13</sub> | U <sub>12</sub> |
|------|-----------------|-----------------|-----------------|-----------------|-----------------|-----------------|
| C32  | 25.7 (12)       | 16.2 (11)       | 23.4 (12)       | 1.1 (9)         | 4.1 (9)         | -2.8 (9)        |
| C33  | 28.1 (13)       | 26.2 (13)       | 25.0 (13)       | 0.6 (10)        | 3.5 (10)        | -4.8 (10)       |
| C34  | 21.6 (11)       | 20.6 (11)       | 24.7 (12)       | 1.9 (10)        | 6.9 (9)         | -1.7 (9)        |
| C35  | 27.3 (12)       | 19.0 (11)       | 20.4 (12)       | 2.2 (9)         | 6.3 (9)         | 1.9 (9)         |
| C36  | 24.3 (12)       | 19.2 (11)       | 23.0 (13)       | 0.8 (9)         | 3.9 (9)         | -0.2 (9)        |
| C37  | 26.5 (12)       | 15.4 (11)       | 25.1 (12)       | 0.6 (9)         | 6.8 (9)         | -0.4 (9)        |
| C38  | 24.1 (12)       | 23.7 (12)       | 28.6 (13)       | -0.6 (10)       | 7.5 (10)        | 0.2 (10)        |
| C39  | 24.1 (12)       | 22.5 (12)       | 21.7 (12)       | -0.9 (10)       | 4.8 (9)         | -0.7 (10)       |
| C40  | 28.1 (13)       | 19.6 (12)       | 21.2 (12)       | 2.2 (9)         | 5.0 (10)        | 0.4 (9)         |
| C41  | 20.1 (11)       | 21.0 (11)       | 19.5 (11)       | -4.0 (9)        | 5.9 (9)         | -1.2 (9)        |
| C42  | 21.0 (11)       | 17.6 (11)       | 22.2 (12)       | -0.6 (9)        | 3.9 (9)         | 0.1 (9)         |
| C43  | 17.7 (11)       | 17.4 (11)       | 22.5 (12)       | -3.5 (9)        | 2.2 (9)         | -2.3 (9)        |
| C44  | 22.7 (12)       | 19.8 (11)       | 30.6 (14)       | -3.0 (10)       | 6.6 (10)        | 1.9 (10)        |
| C45  | 18.2 (11)       | 21.5 (11)       | 19.0 (11)       | -3.9 (9)        | 6.5 (9)         | -1.9 (9)        |
| C46  | 22.6 (11)       | 21.3 (12)       | 19.6 (12)       | -0.9 (9)        | 3.7 (9)         | -1.8 (10)       |
| C47  | 31.6 (14)       | 28.8 (14)       | 23.1 (13)       | 4.2 (10)        | 7.2 (10)        | 7.7 (11)        |
| C48  | 22.6 (11)       | 21.2 (12)       | 22.4 (12)       | -1.2 (10)       | 4.9 (9)         | 1.5 (10)        |

**Table S6. Bond Lengths for 4a<sub>2</sub>.**

| Atom | Atom | Length/ $\text{\AA}$ | Atom | Atom | Length/ $\text{\AA}$ |
|------|------|----------------------|------|------|----------------------|
| C11  | C49  | 1.763 (3)            | N10  | N12  | 1.438 (3)            |
| C12  | C49  | 1.775 (3)            | N10  | C28  | 1.421 (3)            |
| O1   | C1   | 1.210 (3)            | N11  | C28  | 1.371 (3)            |
| O2   | C3   | 1.214 (3)            | N11  | C29  | 1.456 (3)            |
| O3   | C4   | 1.210 (3)            | N11  | C30  | 1.394 (4)            |
| O4   | C6   | 1.205 (3)            | N12  | C30  | 1.368 (3)            |
| O5   | C11  | 1.369 (3)            | N12  | C31  | 1.437 (3)            |
| O5   | C15  | 1.422 (3)            | C7   | C8   | 1.407 (3)            |
| O6   | C16  | 1.430 (3)            | C7   | C13  | 1.387 (4)            |
| O6   | C17  | 1.369 (3)            | C8   | C9   | 1.501 (3)            |
| O7   | C25  | 1.200 (3)            | C8   | C10  | 1.383 (4)            |
| O8   | C27  | 1.210 (3)            | C10  | C11  | 1.394 (4)            |
| O9   | C28  | 1.205 (3)            | C11  | C12  | 1.388 (4)            |
| O10  | C30  | 1.218 (3)            | C12  | C13  | 1.406 (3)            |
| O11  | C35  | 1.371 (3)            | C13  | C14  | 1.508 (3)            |
| O11  | C39  | 1.435 (3)            | C15  | C16  | 1.498 (4)            |
| O12  | C40  | 1.431 (3)            | C17  | C18  | 1.378 (4)            |

**Table S6. Bond Lengths for 4a<sub>2</sub>.**

| Atom | Atom | Length/Å  | Atom | Atom | Length/Å  |
|------|------|-----------|------|------|-----------|
| O12  | C41  | 1.364 (3) | C17  | C24  | 1.401 (4) |
| N1   | N3   | 1.440 (3) | C18  | C19  | 1.404 (3) |
| N1   | C1   | 1.376 (3) | C19  | C20  | 1.506 (4) |
| N1   | C45  | 1.431 (3) | C19  | C21  | 1.393 (3) |
| N2   | C1   | 1.398 (3) | C21  | C22  | 1.401 (4) |
| N2   | C2   | 1.461 (3) | C22  | C23  | 1.508 (3) |
| N2   | C3   | 1.367 (3) | C22  | C24  | 1.387 (3) |
| N3   | N4   | 1.380 (3) | C31  | C32  | 1.402 (4) |
| N3   | C3   | 1.406 (3) | C31  | C37  | 1.388 (4) |
| N4   | N6   | 1.435 (3) | C32  | C33  | 1.503 (4) |
| N4   | C4   | 1.417 (3) | C32  | C34  | 1.385 (4) |
| N5   | C4   | 1.362 (3) | C34  | C35  | 1.392 (4) |
| N5   | C5   | 1.456 (3) | C35  | C36  | 1.395 (4) |
| N5   | C6   | 1.394 (3) | C36  | C37  | 1.398 (4) |
| N6   | C6   | 1.384 (3) | C37  | C38  | 1.511 (3) |
| N6   | C7   | 1.438 (3) | C39  | C40  | 1.506 (3) |
| N7   | N9   | 1.438 (3) | C41  | C42  | 1.389 (3) |
| N7   | C21  | 1.440 (3) | C41  | C48  | 1.393 (4) |
| N7   | C25  | 1.385 (3) | C42  | C43  | 1.398 (3) |
| N8   | C25  | 1.399 (3) | C43  | C44  | 1.499 (3) |
| N8   | C26  | 1.453 (3) | C43  | C45  | 1.394 (4) |
| N8   | C27  | 1.364 (3) | C45  | C46  | 1.399 (4) |
| N9   | N10  | 1.392 (3) | C46  | C47  | 1.509 (4) |
| N9   | C27  | 1.421 (3) | C46  | C48  | 1.387 (3) |

**Table S7. Bond Angles for 4a<sub>2</sub>.**

| Atom | Atom | Atom | Angle/°     | Atom | Atom | Atom | Angle/°   |
|------|------|------|-------------|------|------|------|-----------|
| C11  | C49  | C12  | 112.37 (18) | C11  | C12  | C13  | 119.6 (2) |
| C11  | O5   | C15  | 117.51 (19) | C7   | C13  | C12  | 118.4 (2) |
| C17  | O6   | C16  | 116.65 (19) | C7   | C13  | C14  | 122.5 (2) |
| C35  | O11  | C39  | 116.84 (19) | C12  | C13  | C14  | 119.1 (2) |
| C41  | O12  | C40  | 119.01 (19) | O5   | C15  | C16  | 107.3 (2) |
| C1   | N1   | N3   | 106.99 (19) | O6   | C16  | C15  | 108.5 (2) |
| C1   | N1   | C45  | 125.7 (2)   | O6   | C17  | C18  | 124.9 (2) |
| C45  | N1   | N3   | 117.40 (19) | O6   | C17  | C24  | 114.5 (2) |
| C1   | N2   | C2   | 123.6 (2)   | C18  | C17  | C24  | 120.6 (2) |
| C3   | N2   | C1   | 112.1 (2)   | C17  | C18  | C19  | 120.4 (2) |
| C3   | N2   | C2   | 124.3 (2)   | C18  | C19  | C20  | 120.2 (2) |

**Table S7. Bond Angles for 4a2.**

| Atom | Atom | Atom | Angle/°     | Atom | Atom | Atom | Angle/°   |
|------|------|------|-------------|------|------|------|-----------|
| N4   | N3   | N1   | 114.90 (19) | C21  | C19  | C18  | 118.1 (2) |
| N4   | N3   | C3   | 120.2 (2)   | C21  | C19  | C20  | 121.6 (2) |
| C3   | N3   | N1   | 107.26 (19) | C19  | C21  | N7   | 117.6 (2) |
| N3   | N4   | N6   | 112.94 (18) | C19  | C21  | C22  | 122.2 (2) |
| N3   | N4   | C4   | 118.6 (2)   | C22  | C21  | N7   | 120.2 (2) |
| C4   | N4   | N6   | 107.30 (19) | C21  | C22  | C23  | 122.2 (2) |
| C4   | N5   | C5   | 124.9 (2)   | C24  | C22  | C21  | 118.3 (2) |
| C4   | N5   | C6   | 112.0 (2)   | C24  | C22  | C23  | 119.5 (2) |
| C6   | N5   | C5   | 123.0 (2)   | C22  | C24  | C17  | 120.3 (2) |
| N4   | N6   | C7   | 116.95 (18) | O7   | C25  | N7   | 127.2 (2) |
| C6   | N6   | N4   | 107.01 (19) | O7   | C25  | N8   | 126.2 (2) |
| C6   | N6   | C7   | 122.8 (2)   | N7   | C25  | N8   | 106.6 (2) |
| N9   | N7   | C21  | 117.21 (19) | O8   | C27  | N8   | 129.6 (2) |
| C25  | N7   | N9   | 107.42 (18) | O8   | C27  | N9   | 124.5 (2) |
| C25  | N7   | C21  | 120.4 (2)   | N8   | C27  | N9   | 105.9 (2) |
| C25  | N8   | C26  | 123.0 (2)   | O9   | C28  | N10  | 124.9 (2) |
| C27  | N8   | C25  | 111.7 (2)   | O9   | C28  | N11  | 129.7 (2) |
| C27  | N8   | C26  | 125.3 (2)   | N11  | C28  | N10  | 105.4 (2) |
| N10  | N9   | N7   | 113.35 (19) | O10  | C30  | N11  | 126.2 (2) |
| N10  | N9   | C27  | 116.65 (19) | O10  | C30  | N12  | 127.5 (3) |
| C27  | N9   | N7   | 107.12 (19) | N12  | C30  | N11  | 106.3 (2) |
| N9   | N10  | N12  | 112.49 (19) | C32  | C31  | N12  | 119.4 (2) |
| N9   | N10  | C28  | 117.8 (2)   | C37  | C31  | N12  | 117.3 (2) |
| C28  | N10  | N12  | 106.55 (19) | C37  | C31  | C32  | 122.9 (2) |
| C28  | N11  | C29  | 123.5 (2)   | C31  | C32  | C33  | 121.9 (2) |
| C28  | N11  | C30  | 111.9 (2)   | C34  | C32  | C31  | 117.5 (2) |
| C30  | N11  | C29  | 124.5 (2)   | C34  | C32  | C33  | 120.6 (2) |
| C30  | N12  | N10  | 108.1 (2)   | C32  | C34  | C35  | 120.7 (2) |
| C30  | N12  | C31  | 127.9 (2)   | O11  | C35  | C34  | 115.6 (2) |
| C31  | N12  | N10  | 115.60 (19) | O11  | C35  | C36  | 123.6 (2) |
| O1   | C1   | N1   | 127.7 (2)   | C34  | C35  | C36  | 120.8 (2) |
| O1   | C1   | N2   | 126.3 (2)   | C35  | C36  | C37  | 119.5 (2) |
| N1   | C1   | N2   | 106.0 (2)   | C31  | C37  | C36  | 118.4 (2) |
| O2   | C3   | N2   | 130.0 (2)   | C31  | C37  | C38  | 121.6 (2) |
| O2   | C3   | N3   | 124.9 (2)   | C36  | C37  | C38  | 120.1 (2) |
| N2   | C3   | N3   | 105.0 (2)   | O11  | C39  | C40  | 107.3 (2) |
| O3   | C4   | N4   | 125.2 (2)   | O12  | C40  | C39  | 106.8 (2) |
| O3   | C4   | N5   | 129.5 (2)   | O12  | C41  | C42  | 124.3 (2) |
| N5   | C4   | N4   | 105.3 (2)   | O12  | C41  | C48  | 114.5 (2) |
| O4   | C6   | N5   | 126.4 (2)   | C42  | C41  | C48  | 121.2 (2) |

**Table S7. Bond Angles for 4a<sub>2</sub>.**

| Atom | Atom | Atom | Angle/°   | Atom | Atom | Atom | Angle/°   |
|------|------|------|-----------|------|------|------|-----------|
| O4   | C6   | N6   | 127.2 (2) | C41  | C42  | C43  | 119.4 (2) |
| N6   | C6   | N5   | 106.4 (2) | C42  | C43  | C44  | 119.1 (2) |
| C8   | C7   | N6   | 119.4 (2) | C45  | C43  | C42  | 118.6 (2) |
| C13  | C7   | N6   | 118.1 (2) | C45  | C43  | C44  | 122.3 (2) |
| C13  | C7   | C8   | 122.5 (2) | C43  | C45  | N1   | 120.6 (2) |
| C7   | C8   | C9   | 121.3 (2) | C43  | C45  | C46  | 122.2 (2) |
| C10  | C8   | C7   | 117.9 (2) | C46  | C45  | N1   | 117.1 (2) |
| C10  | C8   | C9   | 120.8 (2) | C45  | C46  | C47  | 122.0 (2) |
| C8   | C10  | C11  | 120.7 (2) | C48  | C46  | C45  | 118.2 (2) |
| O5   | C11  | C10  | 115.0 (2) | C48  | C46  | C47  | 119.8 (2) |
| O5   | C11  | C12  | 124.1 (2) | C46  | C48  | C41  | 120.2 (2) |
| C12  | C11  | C10  | 121.0 (2) |      |      |      |           |

**Table S8. Torsion Angles for 4a<sub>2</sub>.**

| A   | B   | C   | D   | Angle/°    | A   | B   | C   | D   | Angle/°    |
|-----|-----|-----|-----|------------|-----|-----|-----|-----|------------|
| O5  | C11 | C12 | C13 | 179.6 (2)  | C8  | C10 | C11 | O5  | -179.0 (2) |
| O5  | C15 | C16 | O6  | -72.5 (3)  | C8  | C10 | C11 | C12 | 0.7 (4)    |
| O6  | C17 | C18 | C19 | -177.9 (2) | C9  | C8  | C10 | C11 | 179.0 (2)  |
| O6  | C17 | C24 | C22 | 177.3 (2)  | C10 | C11 | C12 | C13 | -0.2 (4)   |
| O11 | C35 | C36 | C37 | -176.0 (2) | C11 | O5  | C15 | C16 | -172.5 (2) |
| O11 | C39 | C40 | O12 | 82.9 (2)   | C11 | C12 | C13 | C7  | -0.7 (4)   |
| O12 | C41 | C42 | C43 | 177.1 (2)  | C11 | C12 | C13 | C14 | 178.6 (2)  |
| O12 | C41 | C48 | C46 | -177.9 (2) | C13 | C7  | C8  | C9  | -179.9 (2) |
| N1  | N3  | N4  | N6  | -130.7 (2) | C13 | C7  | C8  | C10 | -0.5 (4)   |
| N1  | N3  | N4  | C4  | 102.6 (2)  | C15 | O5  | C11 | C10 | -179.6 (2) |
| N1  | N3  | C3  | O2  | -167.2 (2) | C15 | O5  | C11 | C12 | 0.7 (4)    |
| N1  | N3  | C3  | N2  | 14.5 (3)   | C16 | O6  | C17 | C18 | 2.3 (4)    |
| N1  | C45 | C46 | C47 | -7.0 (4)   | C16 | O6  | C17 | C24 | -177.5 (2) |
| N1  | C45 | C46 | C48 | 173.3 (2)  | C17 | O6  | C16 | C15 | 169.7 (2)  |
| N3  | N1  | C1  | O1  | -167.2 (3) | C17 | C18 | C19 | C20 | -177.6 (2) |
| N3  | N1  | C1  | N2  | 12.2 (3)   | C17 | C18 | C19 | C21 | 0.4 (4)    |
| N3  | N1  | C45 | C43 | 76.2 (3)   | C18 | C17 | C24 | C22 | -2.5 (4)   |
| N3  | N1  | C45 | C46 | -100.3 (3) | C18 | C19 | C21 | N7  | 180.0 (2)  |
| N3  | N4  | N6  | C6  | -146.8 (2) | C18 | C19 | C21 | C22 | -2.1 (4)   |
| N3  | N4  | N6  | C7  | 70.8 (3)   | C19 | C21 | C22 | C23 | -178.5 (2) |
| N3  | N4  | C4  | O3  | -38.5 (3)  | C19 | C21 | C22 | C24 | 1.5 (4)    |
| N3  | N4  | C4  | N5  | 142.5 (2)  | C20 | C19 | C21 | N7  | -2.0 (4)   |
| N4  | N3  | C3  | O2  | -33.5 (4)  | C20 | C19 | C21 | C22 | 175.9 (2)  |

**Table S8. Torsion Angles for 4a<sub>2</sub>.**

| A   | B   | C   | D   | Angle/°    | A   | B   | C   | D   | Angle/°    |
|-----|-----|-----|-----|------------|-----|-----|-----|-----|------------|
| N4  | N3  | C3  | N2  | 148.2 (2)  | C21 | N7  | N9  | N10 | 79.4 (3)   |
| N4  | N6  | C6  | O4  | -170.9 (2) | C21 | N7  | N9  | C27 | -150.5 (2) |
| N4  | N6  | C6  | N5  | 9.6 (2)    | C21 | N7  | C25 | O7  | -33.5 (4)  |
| N4  | N6  | C7  | C8  | 76.2 (3)   | C21 | N7  | C25 | N8  | 145.6 (2)  |
| N4  | N6  | C7  | C13 | -102.4 (2) | C21 | C22 | C24 | C17 | 0.8 (4)    |
| N6  | N4  | C4  | O3  | -167.9 (2) | C23 | C22 | C24 | C17 | -179.1 (2) |
| N6  | N4  | C4  | N5  | 13.1 (2)   | C24 | C17 | C18 | C19 | 1.9 (4)    |
| N6  | C7  | C8  | C9  | 1.6 (3)    | C25 | N7  | N9  | N10 | -141.4 (2) |
| N6  | C7  | C8  | C10 | -179.0 (2) | C25 | N7  | N9  | C27 | -11.3 (2)  |
| N6  | C7  | C13 | C12 | 179.6 (2)  | C25 | N7  | C21 | C19 | 113.0 (3)  |
| N6  | C7  | C13 | C14 | 0.3 (3)    | C25 | N7  | C21 | C22 | -64.9 (3)  |
| N7  | N9  | N10 | N12 | -135.0 (2) | C25 | N8  | C27 | O8  | 175.6 (3)  |
| N7  | N9  | N10 | C28 | 100.4 (2)  | C25 | N8  | C27 | N9  | -5.4 (3)   |
| N7  | N9  | C27 | O8  | -170.9 (2) | C26 | N8  | C25 | O7  | -4.2 (4)   |
| N7  | N9  | C27 | N8  | 10.1 (3)   | C26 | N8  | C25 | N7  | 176.6 (2)  |
| N7  | C21 | C22 | C23 | -0.7 (4)   | C26 | N8  | C27 | O8  | -2.6 (4)   |
| N7  | C21 | C22 | C24 | 179.3 (2)  | C26 | N8  | C27 | N9  | 176.4 (2)  |
| N9  | N7  | C21 | C19 | -113.2 (2) | C27 | N8  | C25 | O7  | 177.5 (3)  |
| N9  | N7  | C21 | C22 | 68.9 (3)   | C27 | N8  | C25 | N7  | -1.6 (3)   |
| N9  | N7  | C25 | O7  | -171.2 (2) | C27 | N9  | N10 | N12 | 99.8 (2)   |
| N9  | N7  | C25 | N8  | 7.9 (3)    | C27 | N9  | N10 | C28 | -24.7 (3)  |
| N9  | N10 | N12 | C30 | -144.1 (2) | C28 | N10 | N12 | C30 | -13.6 (3)  |
| N9  | N10 | N12 | C31 | 64.9 (3)   | C28 | N10 | N12 | C31 | -164.6 (2) |
| N9  | N10 | C28 | O9  | -41.9 (4)  | C28 | N11 | C30 | O10 | 177.5 (3)  |
| N9  | N10 | C28 | N11 | 138.7 (2)  | C28 | N11 | C30 | N12 | -3.1 (3)   |
| N10 | N9  | C27 | O8  | -42.7 (3)  | C29 | N11 | C28 | O9  | -2.5 (5)   |
| N10 | N9  | C27 | N8  | 138.3 (2)  | C29 | N11 | C28 | N10 | 176.8 (2)  |
| N10 | N12 | C30 | O10 | -170.4 (3) | C29 | N11 | C30 | O10 | -4.6 (4)   |
| N10 | N12 | C30 | N11 | 10.2 (3)   | C29 | N11 | C30 | N12 | 174.8 (2)  |
| N10 | N12 | C31 | C32 | 67.7 (3)   | C30 | N11 | C28 | O9  | 175.4 (3)  |
| N10 | N12 | C31 | C37 | -105.8 (3) | C30 | N11 | C28 | N10 | -5.3 (3)   |
| N12 | N10 | C28 | O9  | -169.4 (3) | C30 | N12 | C31 | C32 | -76.5 (3)  |
| N12 | N10 | C28 | N11 | 11.3 (3)   | C30 | N12 | C31 | C37 | 110.1 (3)  |
| N12 | C31 | C32 | C33 | 6.4 (4)    | C31 | N12 | C30 | O10 | -24.1 (4)  |
| N12 | C31 | C32 | C34 | -170.7 (2) | C31 | N12 | C30 | N11 | 156.5 (2)  |
| N12 | C31 | C37 | C36 | 170.1 (2)  | C31 | C32 | C34 | C35 | 1.9 (4)    |
| N12 | C31 | C37 | C38 | -10.1 (4)  | C32 | C31 | C37 | C36 | -3.1 (4)   |
| C1  | N1  | N3  | N4  | -153.4 (2) | C32 | C31 | C37 | C38 | 176.7 (2)  |
| C1  | N1  | N3  | C3  | -16.9 (3)  | C32 | C34 | C35 | O11 | 175.1 (2)  |
| C1  | N1  | C45 | C43 | -64.8 (3)  | C32 | C34 | C35 | C36 | -5.4 (4)   |

**Table S8. Torsion Angles for 4a<sub>2</sub>.**

| A  | B  | C   | D   | Angle/°    | A   | B   | C   | D   | Angle/°    |
|----|----|-----|-----|------------|-----|-----|-----|-----|------------|
| C1 | N1 | C45 | C46 | 118.8 (3)  | C33 | C32 | C34 | C35 | -175.3 (2) |
| C1 | N2 | C3  | O2  | 174.6 (3)  | C34 | C35 | C36 | C37 | 4.6 (4)    |
| C1 | N2 | C3  | N3  | -7.2 (3)   | C35 | O11 | C39 | C40 | 160.7 (2)  |
| C2 | N2 | C1  | O1  | -6.3 (4)   | C35 | C36 | C37 | C31 | -0.4 (4)   |
| C2 | N2 | C1  | N1  | 174.3 (2)  | C35 | C36 | C37 | C38 | 179.8 (2)  |
| C2 | N2 | C3  | O2  | -2.9 (4)   | C37 | C31 | C32 | C33 | 179.5 (2)  |
| C2 | N2 | C3  | N3  | 175.3 (2)  | C37 | C31 | C32 | C34 | 2.4 (4)    |
| C3 | N2 | C1  | O1  | 176.1 (3)  | C39 | O11 | C35 | C34 | -155.0 (2) |
| C3 | N2 | C1  | N1  | -3.3 (3)   | C39 | O11 | C35 | C36 | 25.5 (3)   |
| C3 | N3 | N4  | N6  | 98.8 (2)   | C40 | O12 | C41 | C42 | 6.3 (4)    |
| C3 | N3 | N4  | C4  | -27.9 (3)  | C40 | O12 | C41 | C48 | -172.9 (2) |
| C4 | N4 | N6  | C6  | -14.3 (2)  | C41 | O12 | C40 | C39 | -179.1 (2) |
| C4 | N4 | N6  | C7  | -156.6 (2) | C41 | C42 | C43 | C44 | -179.9 (2) |
| C4 | N5 | C6  | O4  | 179.1 (3)  | C41 | C42 | C43 | C45 | 1.3 (3)    |
| C4 | N5 | C6  | N6  | -1.5 (3)   | C42 | C41 | C48 | C46 | 2.9 (4)    |
| C5 | N5 | C4  | O3  | -8.4 (4)   | C42 | C43 | C45 | N1  | -174.1 (2) |
| C5 | N5 | C4  | N4  | 170.5 (2)  | C42 | C43 | C45 | C46 | 2.1 (3)    |
| C5 | N5 | C6  | O4  | 1.1 (4)    | C43 | C45 | C46 | C47 | 176.7 (2)  |
| C5 | N5 | C6  | N6  | -179.4 (2) | C43 | C45 | C46 | C48 | -3.1 (4)   |
| C6 | N5 | C4  | O3  | 173.7 (2)  | C44 | C43 | C45 | N1  | 7.2 (3)    |
| C6 | N5 | C4  | N4  | -7.4 (3)   | C44 | C43 | C45 | C46 | -176.6 (2) |
| C6 | N6 | C7  | C8  | -59.7 (3)  | C45 | N1  | N3  | N4  | 58.9 (3)   |
| C6 | N6 | C7  | C13 | 121.7 (2)  | C45 | N1  | N3  | C3  | -164.6 (2) |
| C7 | N6 | C6  | O4  | -31.3 (4)  | C45 | N1  | C1  | O1  | -23.0 (4)  |
| C7 | N6 | C6  | N5  | 149.2 (2)  | C45 | N1  | C1  | N2  | 156.5 (2)  |
| C7 | C8 | C10 | C11 | -0.4 (4)   | C45 | C46 | C48 | C41 | 0.6 (4)    |
| C8 | C7 | C13 | C12 | 1.1 (4)    | C47 | C46 | C48 | C41 | -179.2 (2) |
| C8 | C7 | C13 | C14 | -178.2 (2) | C48 | C41 | C42 | C43 | -3.8 (4)   |

**Table S9. Hydrogen Atom Coordinates ( $\text{\AA}\times 10^4$ ) and Isotropic Displacement Parameters ( $\text{\AA}^2\times 10^3$ ) for 4a<sub>2</sub>.**

| Atom | x       | y        | z        | U(eq) |
|------|---------|----------|----------|-------|
| H49A | 6799.91 | 12143.45 | -1655.37 | 44    |
| H49B | 7063.28 | 12981.16 | -2169.96 | 44    |
| H2A  | 3444.37 | 9625.26  | 1671.6   | 41    |
| H2B  | 1699    | 9576.8   | 1437.03  | 41    |
| H2C  | 2729.03 | 10435.66 | 1208.24  | 41    |
| H5A  | 1607.08 | 4985.77  | 232.56   | 47    |

**Table S9. Hydrogen Atom Coordinates ( $\text{\AA}\times 10^4$ ) and Isotropic Displacement Parameters ( $\text{\AA}^2\times 10^3$ ) for  $4a_2$ .**

| Atom | <i>x</i> | <i>y</i> | <i>z</i> | U(eq) |
|------|----------|----------|----------|-------|
| H5B  | 974.16   | 4775.41  | -507.03  | 47    |
| H5C  | -93.23   | 5266.4   | 19.39    | 47    |
| H9A  | 4180.17  | 6377.64  | -1307.84 | 36    |
| H9B  | 4786.38  | 6221.55  | -2041.42 | 36    |
| H9C  | 3110.96  | 5896.73  | -1867.58 | 36    |
| H10  | 4465.56  | 7436.04  | -2834.68 | 25    |
| H12  | 1775.46  | 9687.26  | -2503.48 | 25    |
| H14A | 1147.54  | 9701.6   | -1098.69 | 34    |
| H14B | 136.88   | 8774.92  | -1035.28 | 34    |
| H14C | -193.63  | 9497.13  | -1632.38 | 34    |
| H15A | 3553.68  | 10348.33 | -3261.87 | 28    |
| H15B | 2045.24  | 9863.07  | -3568.59 | 28    |
| H16A | 3520.3   | 9433.05  | -4527.59 | 27    |
| H16B | 3190.98  | 10538.11 | -4463.72 | 27    |
| H18  | 4329.42  | 9982.65  | -5457.88 | 26    |
| H20A | 4572.96  | 9609.56  | -6626.87 | 42    |
| H20B | 6202.02  | 9595.07  | -6952.46 | 42    |
| H20C | 5342.3   | 10571.78 | -6851.34 | 42    |
| H23A | 10748.24 | 9877.99  | -5331.86 | 33    |
| H23B | 10476.28 | 10550.96 | -4709.23 | 33    |
| H23C | 10533.97 | 10983.99 | -5442.61 | 33    |
| H24  | 8077.16  | 10431.29 | -4289.31 | 24    |
| H26A | 11332.21 | 11714.57 | -7558.71 | 38    |
| H26B | 12607.27 | 10916.23 | -7524.42 | 38    |
| H26C | 12437.26 | 11628.85 | -6915.6  | 38    |
| H29A | 8487.75  | 6526.5   | -8210.88 | 49    |
| H29B | 10259.59 | 6366.17  | -8065.49 | 49    |
| H29C | 9688.17  | 7267.04  | -8478.1  | 49    |
| H33A | 6125.78  | 8059.01  | -6306.84 | 40    |
| H33B | 5470.55  | 7224.54  | -5866.76 | 40    |
| H33C | 6709.83  | 7006.23  | -6409.33 | 40    |
| H34  | 6260.18  | 7681.53  | -4769.07 | 27    |
| H36  | 10698.79 | 8090.94  | -4273.94 | 27    |
| H38A | 12152.57 | 7333.62  | -5740.1  | 38    |
| H38B | 12592.9  | 7872.14  | -5062.56 | 38    |
| H38C | 12122.86 | 8457.29  | -5716.64 | 38    |
| H39A | 9297.96  | 9247.77  | -3646.1  | 27    |
| H39B | 9745.96  | 8349.63  | -3197.29 | 27    |
| H40A | 8382.82  | 9675.24  | -2647.13 | 27    |



**Table S9. Hydrogen Atom Coordinates ( $\text{\AA} \times 10^4$ ) and Isotropic Displacement Parameters ( $\text{\AA}^2 \times 10^3$ ) for **4a<sub>2</sub>**.**

| Atom | x       | y        | z        | U(eq) |
|------|---------|----------|----------|-------|
| H40B | 6897.04 | 9232.22  | -3006.81 | 27    |
| H42  | 6095.45 | 9782.17  | -2012.68 | 24    |
| H44A | 4898.44 | 10687.76 | -774.5   | 36    |
| H44B | 3452.87 | 10012.58 | -753.53  | 36    |
| H44C | 3971.59 | 10436.13 | -1447.64 | 36    |
| H47A | 6777.9  | 7446.26  | 254.47   | 42    |
| H47B | 7605.67 | 6787.57  | -266.9   | 42    |
| H47C | 5810.79 | 6721.46  | -194.47  | 42    |
| H48  | 7942.69 | 7325.86  | -1358.63 | 26    |

### Experimental

Single crystals were recrystallized from a solution of Compound **4a<sub>2</sub>** (GB2020\_Dec) dissolved in a mixture of dichloromethane and methanol. A suitable crystal with dimensions  $0.33 \times 0.13 \times 0.10 \text{ mm}^3$  was selected and mounted on a loop with paratone oil on a XtaLAB Synergy, Dualflex, HyPix diffractometer. The crystal was kept at 100 K during data collection. Using *Olex2* [5], the structure was solved with the *olex2.solve* [2] structure solution program and refined with *SHELXL* [3] via full matrix least squares minimization on  $F^2$ .

1. Dolomanov, O.V., Bourhis, L.J., Gildea, R.J., Howard, J.A.K. & Puschmann, H. (2009), *J. Appl. Cryst.* **42**, 339.
2. Bourhis, L.J., Dolomanov, O.V., Gildea, R.J., Howard, J.A.K. & Puschmann, H. (2015), *Acta Cryst.* **A71**, 59.
3. Sheldrick, G. M. (2015), *Acta Cryst.* **C71**, 3.

### Crystal structure determination of **4a<sub>2</sub>**

**Crystal Data** for  $\text{C}_{49}\text{H}_{54}\text{Cl}_2\text{N}_{12}\text{O}_{12}$  ( $M=1073.94 \text{ g/mol}$ ): monoclinic, space group  $P2_1$  (no. 4),  $a = 8.83819(7) \text{ \AA}$ ,  $b = 14.23369(11) \text{ \AA}$ ,  $c = 20.10392(16) \text{ \AA}$ ,  $\beta = 91.7994(7)^\circ$ ,  $V = 2527.83(3) \text{ \AA}^3$ ,  $Z = 2$ ,  $T = 100.15 \text{ K}$ ,  $\mu(\text{CuK}\alpha) = 1.792 \text{ mm}^{-1}$ ,  $D_{\text{calc}} = 1.411 \text{ g/cm}^3$ , 35964 reflections measured ( $4.398^\circ \leq 2\theta \leq 155.172^\circ$ ), 10128 unique ( $R_{\text{int}} = 0.0441$ ,  $R_{\text{sigma}} = 0.0387$ ) which were used in all calculations. The final  $R_1$  was 0.0338 ( $I > 2\sigma(I)$ ) and  $wR_2$  was 0.0896 (all data).

### Refinement model description

Number of restraints - 1, number of constraints - unknown.

#### Details:

1. Twinned data refinement

Scales: 0.50905

0.49095

2.a Secondary CH<sub>2</sub> refined with riding coordinates:

C49(H49A,H49B), C15(H15A,H15B), C16(H16A,H16B), C39(H39A,H39B), C40(H40A,H40B)

2.b Aromatic/amide H refined with riding coordinates:

C10(H10), C12(H12), C18(H18), C24(H24), C34(H34), C36(H36), C42(H42), C48(H48)

2.c Idealised Me refined as rotating group:

C2(H2A,H2B,H2C), C5(H5A,H5B,H5C), C9(H9A,H9B,H9C), C14(H14A,H14B,H14C),

C20(H20A,H20B,H20C), C23(H23A,H23B,H23C), C26(H26A,H26B,H26C), C29(H29A,H29B,

H29C), C33(H33A,H33B,H33C), C38(H38A,H38B,H38C), C44(H44A,H44B,H44C), C47(H47A,

H47B,H47C)

This report has been created with Olex2, compiled on 2023.02.24 svn.rfl66f9f3 for OlexSys. Please [let us know](#) if there are any errors or if you would like to have additional features.

# Crystal Structure Data for Dimer 4b<sub>2</sub>

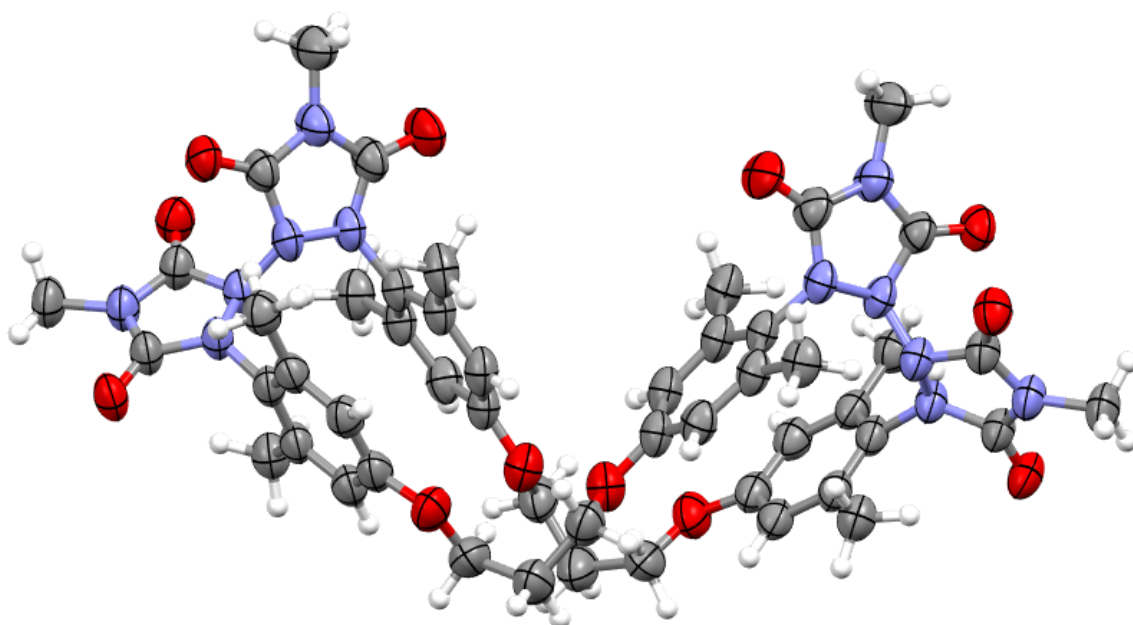

\*ellipsoids represent 50% probability level

**Table S10. Crystal data and structure refinement for 4b<sub>2</sub>.**

|                                    |                                                                                 |
|------------------------------------|---------------------------------------------------------------------------------|
| Identification code                | GB-2021-01                                                                      |
| Empirical formula                  | C <sub>53</sub> H <sub>59</sub> Cl <sub>9</sub> N <sub>12</sub> O <sub>12</sub> |
| Formula weight                     | 1375.17                                                                         |
| Temperature/K                      | 109(2)                                                                          |
| Crystal system                     | monoclinic                                                                      |
| Space group                        | I2/a                                                                            |
| a/Å                                | 27.2958(4)                                                                      |
| b/Å                                | 17.6590(5)                                                                      |
| c/Å                                | 27.3191(6)                                                                      |
| α/°                                | 90                                                                              |
| β/°                                | 95.6702(16)                                                                     |
| γ/°                                | 90                                                                              |
| Volume/Å <sup>3</sup>              | 13103.8(5)                                                                      |
| Z                                  | 8                                                                               |
| ρ <sub>calc</sub> /cm <sup>3</sup> | 1.394                                                                           |
| μ/mm <sup>-1</sup>                 | 4.071                                                                           |
| F(000)                             | 5680.0                                                                          |
| Crystal size/mm <sup>3</sup>       | 0.373 × 0.3 × 0.212                                                             |
| Radiation                          | Cu Kα (λ = 1.54184)                                                             |

$2\Theta$  range for data collection/ $^{\circ}$  6.502 to 130.176  
 Index ranges  $-32 \leq h \leq 25, -20 \leq k \leq 20, -32 \leq l \leq 32$   
 Reflections collected 76750  
 Independent reflections 11103 [ $R_{\text{int}} = 0.0541, R_{\text{sigma}} = 0.0334$ ]  
 Data/restraints/parameters 11103/1592/976  
 Goodness-of-fit on  $F^2$  1.060  
 Final R indexes [ $I \geq 2\sigma(I)$ ]  $R_1 = 0.0707, wR_2 = 0.2089$   
 Final R indexes [all data]  $R_1 = 0.0802, wR_2 = 0.2169$   
 Largest diff. peak/hole /  $e \text{ \AA}^{-3}$  0.42/-0.43

**Table S11. Fractional Atomic Coordinates ( $\times 10^4$ ) and Equivalent Isotropic Displacement Parameters ( $\text{\AA}^2 \times 10^3$ ) for 4b<sub>2</sub>.  $U_{\text{eq}}$  is defined as 1/3 of the trace of the orthogonalised  $U_{\text{IJ}}$  tensor.**

| Atom  | x           | y           | z           | U(eq)     |
|-------|-------------|-------------|-------------|-----------|
| C21   | 3143.3 (15) | 158 (2)     | 4348.9 (11) | 87.4 (11) |
| C22   | 3073 (2)    | 7066 (4)    | 5507 (2)    | 60.3 (16) |
| C6    | 3116 (3)    | 6986 (4)    | 5808 (3)    | 64.8 (17) |
| O1_1  | 3759.2 (8)  | 825.1 (12)  | 4834.5 (6)  | 75.0 (6)  |
| O2_1  | 5282.6 (7)  | 1631.3 (12) | 6774.8 (7)  | 69.5 (5)  |
| O3_1  | 4374.7 (7)  | 3444.9 (12) | 7470.8 (7)  | 69.6 (5)  |
| N1_1  | 4604.1 (6)  | 2333.9 (11) | 6481.9 (6)  | 56.1 (5)  |
| N2_1  | 4274.3 (7)  | 2811.8 (12) | 6723.7 (7)  | 57.4 (5)  |
| N3_1  | 4915.4 (7)  | 2516.3 (13) | 7250.1 (7)  | 62.3 (6)  |
| C2_1  | 3361.3 (11) | 327.8 (17)  | 4864.6 (11) | 76.3 (9)  |
| C3_1  | 3985.5 (9)  | 1149.2 (14) | 5251.1 (8)  | 64.1 (7)  |
| C4_1  | 3871.3 (9)  | 928.8 (15)  | 5714.8 (8)  | 63.1 (7)  |
| C5_1  | 4080.1 (9)  | 1305.7 (14) | 6130.6 (8)  | 59.5 (6)  |
| C6_1  | 4405.0 (8)  | 1901.1 (13) | 6065.9 (7)  | 57.0 (6)  |
| C7_1  | 4538.6 (9)  | 2110.1 (14) | 5606.7 (7)  | 59.7 (6)  |
| C8_1  | 4323.7 (10) | 1721.9 (15) | 5199.7 (8)  | 64.5 (7)  |
| C9_1  | 3941.2 (11) | 1093.9 (18) | 6629.8 (9)  | 68.1 (8)  |
| C10_1 | 4895.0 (10) | 2741.2 (16) | 5540.4 (10) | 67.9 (7)  |
| C11_1 | 4970.6 (8)  | 2108.4 (15) | 6825.9 (8)  | 59.9 (7)  |
| C12_1 | 4516.7 (8)  | 2979.0 (15) | 7190.5 (8)  | 60.3 (7)  |
| C13_1 | 5260.4 (10) | 2492 (2)    | 7690.1 (10) | 74.6 (9)  |
| O1_2  | 2597.3 (7)  | 1198.5 (12) | 4338.2 (7)  | 73.1 (6)  |
| O2_2  | 1875.0 (6)  | 4635.6 (12) | 3761.9 (11) | 86.0 (7)  |
| O3_2  | 229.4 (5)   | 4214.5 (11) | 3379.3 (8)  | 68.2 (5)  |
| N1_2  | 1417.0 (5)  | 3552.4 (10) | 3581.5 (7)  | 56.2 (5)  |

**Table S11. Fractional Atomic Coordinates ( $\times 10^4$ ) and Equivalent Isotropic Displacement Parameters ( $\text{\AA}^2 \times 10^3$ ) for 4b<sub>2</sub>.  $U_{\text{eq}}$  is defined as 1/3 of the trace of the orthogonalised  $U_{ij}$  tensor.**

| Atom  | <i>x</i>    | <i>y</i>    | <i>z</i>    | $U(\text{eq})$ |
|-------|-------------|-------------|-------------|----------------|
| N2_2  | 894.7 (6)   | 3415.2 (10) | 3566.0 (8)  | 55.3 (5)       |
| N3_2  | 1027.5 (6)  | 4647.5 (10) | 3589.3 (10) | 68.0 (6)       |
| C2_2  | 2940.3 (11) | 836.8 (18)  | 4065.2 (11) | 75.2 (9)       |
| C3_2  | 2334.3 (9)  | 1804.4 (14) | 4143.3 (8)  | 61.8 (7)       |
| C4_2  | 2066.2 (9)  | 2215.4 (15) | 4460.5 (8)  | 63.8 (7)       |
| C5_2  | 1775.5 (9)  | 2818.7 (14) | 4287.0 (8)  | 61.0 (7)       |
| C6_2  | 1742.3 (7)  | 2970.0 (13) | 3782.8 (7)  | 55.4 (6)       |
| C7_2  | 2014.2 (8)  | 2580.1 (14) | 3460.3 (8)  | 59.4 (7)       |
| C8_2  | 2318.9 (9)  | 1998.9 (15) | 3650.6 (8)  | 61.9 (7)       |
| C9_2  | 1512.5 (10) | 3290.7 (18) | 4634.1 (9)  | 70.4 (8)       |
| C10_2 | 1980.1 (10) | 2777.6 (19) | 2922.7 (8)  | 69.0 (8)       |
| C11_2 | 1488.1 (7)  | 4309.1 (12) | 3654.2 (12) | 66.0 (7)       |
| C12_2 | 666.2 (7)   | 4125.7 (12) | 3494.0 (11) | 58.7 (6)       |
| C13_2 | 952.6 (11)  | 5459.9 (13) | 3600.4 (19) | 93.5 (12)      |
| O1_3  | 3170.0 (10) | 6066.2 (18) | 4969.9 (13) | 60.1 (9)       |
| O2_3  | 4106 (10)   | 2907 (5)    | 4377.1 (18) | 86 (3)         |
| O3_3  | 4035 (2)    | 3133 (3)    | 2706.1 (15) | 67.6 (12)      |
| N1_3  | 4065.9 (16) | 3942 (3)    | 3860 (2)    | 54.9 (7)       |
| N2_3  | 3956 (4)    | 3998 (3)    | 3334 (2)    | 53.0 (15)      |
| N3_3  | 4082 (4)    | 2796 (3)    | 3531.4 (16) | 61.4 (15)      |
| C2_3  | 3442 (2)    | 6640 (3)    | 5230 (3)    | 66 (2)         |
| C3_3  | 3400.1 (15) | 5544 (4)    | 4704 (4)    | 56.2 (18)      |
| C4_3  | 3113.1 (12) | 4980 (2)    | 4462.2 (18) | 55.8 (11)      |
| C5_3  | 3326.8 (13) | 4438 (2)    | 4184.7 (19) | 51.3 (12)      |
| C6_3  | 3834.3 (13) | 4482 (4)    | 4157 (3)    | 54.5 (15)      |
| C7_3  | 4131.8 (14) | 5017 (5)    | 4412 (4)    | 58.7 (18)      |
| C8_3  | 3905.2 (13) | 5558 (3)    | 4681.5 (19) | 60.1 (14)      |
| C9_3  | 3020.2 (16) | 3815 (3)    | 3941 (2)    | 59.2 (13)      |
| C10_3 | 4679.4 (15) | 5031 (7)    | 4387 (5)    | 65 (2)         |
| C11_3 | 4114 (4)    | 3190 (4)    | 3972.4 (16) | 70.0 (17)      |
| C12_3 | 4030 (3)    | 3273 (3)    | 3140.7 (16) | 53.9 (17)      |
| C13_3 | 4117 (3)    | 1978 (3)    | 3499 (3)    | 76 (2)         |
| O1_4  | 2445.6 (14) | 6905 (3)    | 6030 (2)    | 65.1 (15)      |
| O2_4  | 1055 (3)    | 6037 (4)    | 7788 (3)    | 62.5 (19)      |
| O3_4  | 179 (4)     | 4118 (7)    | 6994 (5)    | 63.5 (13)      |
| N1_4  | 1193.6 (13) | 5294 (3)    | 7120.7 (19) | 55.9 (10)      |
| N2_4  | 880 (3)     | 4774 (6)    | 6828 (3)    | 56.2 (9)       |
| N3_4  | 511 (3)     | 5107 (7)    | 7480 (4)    | 57.5 (16)      |

**Table S11. Fractional Atomic Coordinates ( $\times 10^4$ ) and Equivalent Isotropic Displacement Parameters ( $\text{\AA}^2 \times 10^3$ ) for 4b<sub>2</sub>.  $U_{\text{eq}}$  is defined as 1/3 of the trace of the orthogonalised  $U_{ij}$  tensor.**

| Atom  | <i>x</i>    | <i>y</i>  | <i>z</i>    | $U(\text{eq})$ |
|-------|-------------|-----------|-------------|----------------|
| C2_4  | 2886.6 (16) | 6578 (4)  | 5907 (2)    | 62.6 (14)      |
| C3_4  | 2153.6 (12) | 6533 (2)  | 6328.9 (17) | 55.7 (11)      |
| C4_4  | 1669.0 (13) | 6775 (2)  | 6335.1 (19) | 57.7 (13)      |
| C5_4  | 1343.5 (13) | 6374 (3)  | 6595 (3)    | 49.9 (14)      |
| C6_4  | 1525.0 (11) | 5749 (3)  | 6870 (2)    | 51.6 (16)      |
| C7_4  | 2014.4 (12) | 5522 (2)  | 6892.3 (17) | 52.7 (11)      |
| C8_4  | 2321.2 (19) | 5906 (6)  | 6600 (5)    | 51 (2)         |
| C9_4  | 818.3 (18)  | 6626 (5)  | 6587 (4)    | 62 (2)         |
| C10_4 | 2208.4 (17) | 4877 (3)  | 7214 (2)    | 61.3 (14)      |
| C11_4 | 936 (3)     | 5541 (5)  | 7493 (3)    | 59 (2)         |
| C12_4 | 482 (3)     | 4609 (6)  | 7100 (4)    | 56.8 (9)       |
| C13_4 | 139 (4)     | 5195 (10) | 7820 (6)    | 76 (3)         |
| O1_5  | 2710.3 (10) | 6343 (2)  | 6383.0 (14) | 68.2 (10)      |
| O2_5  | 967 (3)     | 5793 (4)  | 7865 (3)    | 67 (2)         |
| O3_5  | 59 (3)      | 4044 (7)  | 6934 (5)    | 63.5 (13)      |
| N1_5  | 1124.0 (12) | 5068 (3)  | 7193.7 (19) | 55.9 (10)      |
| N2_5  | 800 (3)     | 4645 (7)  | 6845 (3)    | 56.2 (9)       |
| N3_5  | 397 (3)     | 4963 (7)  | 7477 (4)    | 59.6 (17)      |
| C2_5  | 2652 (3)    | 6969 (4)  | 6066 (3)    | 84 (3)         |
| C3_5  | 2324.9 (18) | 6085 (6)  | 6620 (5)    | 60 (2)         |
| C4_5  | 1857.6 (13) | 6391 (3)  | 6509.3 (19) | 62.0 (13)      |
| C5_5  | 1455.6 (12) | 6082 (3)  | 6711 (2)    | 53.9 (17)      |
| C6_5  | 1533.9 (11) | 5447 (3)  | 7014 (2)    | 54.5 (14)      |
| C7_5  | 1997.2 (12) | 5128 (3)  | 7127 (2)    | 61.1 (14)      |
| C8_5  | 2389.8 (12) | 5448 (2)  | 6915.7 (18) | 63.1 (13)      |
| C9_5  | 955.5 (17)  | 6428 (5)  | 6600 (4)    | 61.5 (19)      |
| C10_5 | 2079.0 (17) | 4466 (3)  | 7470 (2)    | 65.3 (14)      |
| C11_5 | 845 (2)     | 5336 (5)  | 7543 (3)    | 53.2 (17)      |
| C12_5 | 370 (3)     | 4506 (7)  | 7076 (4)    | 56.8 (9)       |
| C13_5 | 16 (4)      | 5029 (9)  | 7810 (5)    | 77 (3)         |
| O1_6  | 3576.0 (12) | 6343 (2)  | 5226.1 (17) | 56.5 (12)      |
| O2_6  | 4148 (10)   | 3062 (5)  | 4419.1 (17) | 75 (3)         |
| O3_6  | 3860 (2)    | 3369 (3)  | 2755.0 (14) | 67.6 (12)      |
| N1_6  | 4060.6 (17) | 4122 (3)  | 3923.2 (19) | 54.9 (7)       |
| N2_6  | 3900 (4)    | 4215 (3)  | 3407.5 (19) | 52.6 (15)      |
| N3_6  | 3980 (4)    | 2993 (2)  | 3572.7 (16) | 61.4 (15)      |
| C2_6  | 3124.6 (16) | 6336 (3)  | 5432 (2)    | 57.2 (13)      |
| C3_6  | 3686.2 (12) | 5794 (2)  | 4902.4 (16) | 51.0 (11)      |

**Table S11. Fractional Atomic Coordinates ( $\times 10^4$ ) and Equivalent Isotropic Displacement Parameters ( $\text{\AA}^2 \times 10^3$ ) for 4b<sub>2</sub>.  $U_{\text{eq}}$  is defined as 1/3 of the trace of the orthogonalised  $U_{ij}$  tensor.**

| Atom  | <i>x</i>    | <i>y</i> | <i>z</i>    | $U(\text{eq})$ |
|-------|-------------|----------|-------------|----------------|
| C4_6  | 3324.8 (15) | 5299 (4) | 4702 (3)    | 50.3 (18)      |
| C5_6  | 3437.2 (13) | 4749 (3) | 4367.1 (18) | 51.6 (12)      |
| C6_6  | 3924.3 (14) | 4699 (3) | 4254 (2)    | 53.1 (16)      |
| C7_6  | 4294.6 (15) | 5176 (4) | 4457 (3)    | 50.0 (14)      |
| C8_6  | 4167.0 (13) | 5727 (3) | 4783.8 (17) | 52.4 (12)      |
| C9_6  | 3048.4 (17) | 4213 (3) | 4152 (2)    | 58.4 (14)      |
| C10_6 | 4819.1 (17) | 5086 (6) | 4344 (5)    | 61 (2)         |
| C11_6 | 4062 (3)    | 3364 (3) | 4020.5 (15) | 51.0 (13)      |
| C12_6 | 3914 (3)    | 3491 (3) | 3194.0 (15) | 53.4 (18)      |
| C13_6 | 3972 (3)    | 2175 (3) | 3520 (2)    | 70.0 (17)      |

**Table S12. Anisotropic Displacement Parameters ( $\text{\AA}^2 \times 10^3$ ) for 4b<sub>2</sub>. The Anisotropic displacement factor exponent takes the form:  $-2\pi^2[h^2a^{*2}U_{11}+2hka^*b^*U_{12}+\dots]$ .**

| Atom  | $U_{11}$  | $U_{22}$  | $U_{33}$  | $U_{23}$   | $U_{13}$   | $U_{12}$  |
|-------|-----------|-----------|-----------|------------|------------|-----------|
| C21   | 92 (2)    | 81 (2)    | 84 (2)    | -14.0 (19) | -20.2 (19) | 12.0 (19) |
| C22   | 43 (3)    | 64 (4)    | 75 (4)    | 0 (4)      | 8 (3)      | -2 (2)    |
| C6    | 59 (4)    | 57 (4)    | 80 (5)    | -7 (4)     | 16 (4)     | -5 (3)    |
| O1_1  | 77.2 (13) | 80.3 (14) | 63.9 (12) | -14.6 (10) | -11.7 (10) | 2.0 (11)  |
| O2_1  | 56.9 (11) | 85.5 (14) | 63.5 (12) | 2.2 (10)   | -7.7 (9)   | 21.6 (10) |
| O3_1  | 61.1 (11) | 84.3 (14) | 62.1 (12) | -12.9 (10) | -0.2 (9)   | 7.3 (10)  |
| N1_1  | 45.5 (11) | 69.4 (14) | 51.0 (12) | -5.7 (10)  | -6.6 (9)   | 12.0 (10) |
| N2_1  | 47.0 (11) | 71.5 (15) | 52.4 (12) | -0.7 (10)  | -1.3 (9)   | 9.3 (10)  |
| N3_1  | 53.1 (12) | 78.5 (16) | 52.4 (12) | -3.6 (11)  | -9.5 (10)  | 8.8 (11)  |
| C2_1  | 85 (2)    | 61.7 (19) | 78 (2)    | -8.9 (16)  | -12.2 (17) | 1.8 (15)  |
| C3_1  | 67.1 (17) | 64.2 (17) | 57.5 (15) | -7.3 (12)  | -10.9 (12) | 14.7 (13) |
| C4_1  | 58.5 (16) | 65.3 (18) | 63.2 (15) | -2.9 (13)  | -5.9 (12)  | 10.6 (13) |
| C5_1  | 50.1 (14) | 66.2 (17) | 59.3 (15) | 0.4 (12)   | -8.4 (11)  | 11.4 (12) |
| C6_1  | 51.4 (14) | 63.7 (16) | 53.0 (13) | -4.4 (12)  | -9.6 (11)  | 11.5 (11) |
| C7_1  | 60.0 (15) | 62.4 (16) | 54.3 (14) | 0.2 (12)   | -6.1 (11)  | 14.3 (12) |
| C8_1  | 68.1 (17) | 68.7 (18) | 54.7 (15) | -4.3 (13)  | -3.5 (13)  | 11.0 (13) |
| C9_1  | 60.6 (17) | 79 (2)    | 62.9 (16) | 2.1 (15)   | -1.7 (13)  | 6.2 (15)  |
| C10_1 | 69.0 (18) | 76 (2)    | 57.8 (16) | -0.2 (14)  | -0.7 (14)  | 4.4 (14)  |
| C11_1 | 48.0 (14) | 74.0 (18) | 55.4 (14) | -0.4 (13)  | -6.0 (11)  | 11.6 (12) |
| C12_1 | 50.8 (14) | 76.3 (18) | 52.0 (14) | -5.4 (13)  | -3.7 (11)  | 4.3 (12)  |
| C13_1 | 62.4 (17) | 98 (2)    | 59.1 (17) | -3.3 (16)  | -17.7 (14) | 5.8 (16)  |
| O1_2  | 59.4 (11) | 89.9 (15) | 68.0 (12) | 4.2 (11)   | -2.7 (9)   | 4.9 (10)  |

**Table S12. Anisotropic Displacement Parameters ( $\text{\AA}^2 \times 10^3$ ) for 4b<sub>2</sub>. The Anisotropic displacement factor exponent takes the form:  $-2\pi^2[h^2a^{*2}U_{11}+2hka^*b^*U_{12}+\dots]$ .**

| Atom  | U <sub>11</sub> | U <sub>22</sub> | U <sub>33</sub> | U <sub>23</sub> | U <sub>13</sub> | U <sub>12</sub> |
|-------|-----------------|-----------------|-----------------|-----------------|-----------------|-----------------|
| O2_2  | 39.4 (10)       | 84.4 (15)       | 133 (2)         | -5.4 (14)       | 3.3 (11)        | -15.5 (10)      |
| O3_2  | 39.3 (9)        | 79.7 (14)       | 84.3 (14)       | 3.8 (11)        | 0.4 (9)         | -3.9 (9)        |
| N1_2  | 34.9 (10)       | 72.4 (14)       | 61.0 (13)       | -2.5 (11)       | 3.3 (9)         | -6.6 (9)        |
| N2_2  | 34.8 (10)       | 69.1 (14)       | 61.2 (13)       | -4.2 (11)       | 1.0 (9)         | -8.5 (9)        |
| N3_2  | 40.0 (11)       | 68.2 (14)       | 95.6 (19)       | -5.4 (13)       | 5.8 (11)        | -5.9 (10)       |
| C2_2  | 67.6 (18)       | 83 (2)          | 71.8 (19)       | -15.3 (17)      | -7.2 (15)       | 4.7 (16)        |
| C3_2  | 40.9 (13)       | 80.8 (19)       | 61.8 (15)       | -0.5 (13)       | -3.7 (11)       | -4.5 (12)       |
| C4_2  | 44.3 (14)       | 90 (2)          | 55.5 (15)       | -0.2 (14)       | -2.3 (11)       | -7.2 (12)       |
| C5_2  | 40.4 (13)       | 87 (2)          | 55.1 (14)       | -4.9 (13)       | -0.1 (11)       | -8.2 (12)       |
| C6_2  | 36.9 (12)       | 73.3 (17)       | 54.9 (13)       | -4.8 (12)       | -0.2 (10)       | -7.7 (11)       |
| C7_2  | 36.5 (12)       | 84.2 (19)       | 57.6 (14)       | -5.0 (13)       | 5.4 (10)        | -6.5 (12)       |
| C8_2  | 44.3 (13)       | 81.1 (19)       | 60.6 (15)       | -7.5 (13)       | 6.8 (11)        | -2.4 (12)       |
| C9_2  | 49.3 (15)       | 105 (2)         | 56.2 (16)       | -13.3 (16)      | 2.9 (12)        | -10.2 (15)      |
| C10_2 | 53.1 (15)       | 96 (2)          | 59.0 (16)       | -2.4 (15)       | 10.6 (13)       | -2.7 (15)       |
| C11_2 | 40.4 (13)       | 74.8 (17)       | 83 (2)          | -5.6 (15)       | 5.8 (12)        | -9.5 (12)       |
| C12_2 | 40.5 (12)       | 66.7 (16)       | 68.5 (17)       | -2.8 (13)       | 3.0 (11)        | -6.9 (11)       |
| C13_2 | 55.5 (18)       | 70 (2)          | 153 (4)         | -4 (2)          | 4 (2)           | -1.5 (15)       |
| O1_3  | 39.1 (17)       | 72 (2)          | 70 (2)          | -3.3 (18)       | 9.0 (16)        | -2.0 (15)       |
| O2_3  | 87 (6)          | 111 (6)         | 64 (3)          | 21 (3)          | 18 (4)          | 24 (7)          |
| O3_3  | 78 (4)          | 76 (4)          | 49.8 (13)       | -7.9 (16)       | 10.7 (17)       | -8 (2)          |
| N1_3  | 47.6 (12)       | 78 (2)          | 39.1 (15)       | 5.3 (13)        | 4.1 (10)        | 11.3 (14)       |
| N2_3  | 49 (3)          | 71 (4)          | 39 (2)          | 3 (3)           | 8 (2)           | -5 (4)          |
| N3_3  | 62 (4)          | 71 (2)          | 53.4 (14)       | 5.6 (15)        | 16.5 (16)       | 5 (3)           |
| C2_3  | 60 (4)          | 68 (5)          | 70 (4)          | 0 (4)           | 8 (3)           | -14 (4)         |
| C3_3  | 48 (3)          | 67 (5)          | 54 (4)          | 11 (3)          | 12 (3)          | 8 (2)           |
| C4_3  | 40 (3)          | 72 (3)          | 56 (3)          | 11 (2)          | 7 (2)           | 9 (2)           |
| C5_3  | 39 (3)          | 66 (4)          | 49 (3)          | 14 (2)          | 8 (3)           | 4 (2)           |
| C6_3  | 42 (2)          | 79 (4)          | 43 (4)          | 9 (3)           | 6 (2)           | 9 (2)           |
| C7_3  | 38 (3)          | 91 (5)          | 47 (4)          | 7 (3)           | 8 (4)           | 6 (3)           |
| C8_3  | 43 (3)          | 89 (4)          | 49 (3)          | 6 (3)           | 8 (3)           | 5 (3)           |
| C9_3  | 43 (3)          | 79 (4)          | 56 (3)          | 6 (3)           | 7 (2)           | -2 (3)          |
| C10_3 | 42 (3)          | 109 (6)         | 46 (4)          | -11 (4)         | 9 (4)           | -8 (4)          |
| C11_3 | 80 (5)          | 76 (3)          | 57 (2)          | 4 (2)           | 22 (2)          | 16 (3)          |
| C12_3 | 38 (4)          | 75 (4)          | 49 (2)          | 0 (2)           | 9 (2)           | 3 (3)           |
| C13_3 | 65 (5)          | 73 (3)          | 92 (5)          | 10 (4)          | 27 (4)          | 11 (3)          |
| O1_4  | 55 (3)          | 62 (3)          | 80 (3)          | -1 (2)          | 12 (2)          | 0 (2)           |
| O2_4  | 64 (4)          | 79 (5)          | 43 (3)          | -7 (3)          | 0 (2)           | 2 (3)           |
| O3_4  | 44 (4)          | 83 (3)          | 63 (3)          | 2.6 (16)        | 4 (3)           | 0 (2)           |
| N1_4  | 37.8 (14)       | 82 (3)          | 47.1 (17)       | -9.8 (17)       | -0.1 (11)       | -0.2 (15)       |

**Table S12. Anisotropic Displacement Parameters ( $\text{\AA}^2 \times 10^3$ ) for 4b<sub>2</sub>. The Anisotropic displacement factor exponent takes the form:  $-2\pi^2[h^2a^{*2}U_{11}+2hka^*b^*U_{12}+\dots]$ .**

| Atom  | U <sub>11</sub> | U <sub>22</sub> | U <sub>33</sub> | U <sub>23</sub> | U <sub>13</sub> | U <sub>12</sub> |
|-------|-----------------|-----------------|-----------------|-----------------|-----------------|-----------------|
| N2_4  | 33 (2)          | 83 (3)          | 51.7 (13)       | -15.8 (17)      | -0.9 (13)       | -0.1 (14)       |
| N3_4  | 49 (4)          | 77 (5)          | 47 (3)          | 1 (3)           | 7 (3)           | 6 (3)           |
| C2_4  | 52 (3)          | 68 (4)          | 69 (4)          | -5 (3)          | 9 (3)           | 5 (3)           |
| C3_4  | 43 (2)          | 60 (3)          | 65 (3)          | -12 (2)         | 6 (2)           | -2 (2)          |
| C4_4  | 42 (2)          | 62 (4)          | 69 (4)          | -9 (3)          | 6 (2)           | 0 (2)           |
| C5_4  | 32 (3)          | 64 (4)          | 52 (4)          | -9 (3)          | -3 (3)          | 4 (2)           |
| C6_4  | 40 (2)          | 77 (6)          | 36 (5)          | -7 (3)          | -2 (2)          | 3 (2)           |
| C7_4  | 42 (2)          | 62 (3)          | 53 (3)          | -10 (2)         | -2 (2)          | 2 (2)           |
| C8_4  | 39 (3)          | 58 (5)          | 56 (4)          | -22 (4)         | 2 (2)           | -2 (2)          |
| C9_4  | 35 (3)          | 85 (6)          | 65 (4)          | -1 (4)          | 8 (3)           | 14 (3)          |
| C10_4 | 49 (3)          | 64 (4)          | 70 (4)          | -6 (3)          | 1 (3)           | 3 (3)           |
| C11_4 | 56 (3)          | 73 (5)          | 49 (3)          | -4 (3)          | 6 (2)           | 2 (3)           |
| C12_4 | 34 (3)          | 83 (3)          | 52.1 (16)       | 0.0 (17)        | 0 (2)           | 5.7 (18)        |
| C13_4 | 73 (5)          | 100 (10)        | 58 (5)          | 13 (5)          | 21 (4)          | 10 (5)          |
| O1_5  | 44.1 (18)       | 75 (2)          | 87 (3)          | -26 (2)         | 13.2 (18)       | -9.0 (18)       |
| O2_5  | 64 (4)          | 84 (5)          | 51 (3)          | -11 (3)         | 2 (2)           | 10 (3)          |
| O3_5  | 44 (4)          | 83 (3)          | 63 (3)          | 2.6 (16)        | 4 (3)           | 0 (2)           |
| N1_5  | 37.8 (14)       | 82 (3)          | 47.1 (17)       | -9.8 (17)       | -0.1 (11)       | -0.2 (15)       |
| N2_5  | 33 (2)          | 83 (3)          | 51.7 (13)       | -15.8 (17)      | -0.9 (13)       | -0.1 (14)       |
| N3_5  | 46 (3)          | 82 (5)          | 53 (3)          | 0 (3)           | 12 (3)          | 12 (3)          |
| C2_5  | 91 (7)          | 62 (4)          | 102 (6)         | -26 (3)         | 25 (6)          | -27 (5)         |
| C3_5  | 45 (3)          | 65 (5)          | 72 (5)          | -33 (4)         | 10 (3)          | -10 (2)         |
| C4_5  | 49 (3)          | 67 (4)          | 72 (4)          | -17 (3)         | 14 (3)          | -1 (2)          |
| C5_5  | 34 (3)          | 76 (6)          | 50 (6)          | -13 (3)         | -2 (3)          | 4 (3)           |
| C6_5  | 44 (2)          | 75 (5)          | 43 (4)          | -11 (3)         | -2 (2)          | 0 (2)           |
| C7_5  | 45 (3)          | 83 (5)          | 54 (4)          | -10 (3)         | -1 (3)          | 6 (3)           |
| C8_5  | 49 (3)          | 81 (4)          | 59 (3)          | -22 (3)         | 4 (2)           | 0 (3)           |
| C9_5  | 40 (3)          | 79 (6)          | 67 (4)          | -6 (4)          | 11 (4)          | 7 (4)           |
| C10_5 | 48 (3)          | 83 (4)          | 65 (3)          | -3 (3)          | 2 (3)           | 11 (3)          |
| C11_5 | 45 (4)          | 70 (5)          | 44 (3)          | 2 (3)           | -1 (2)          | 19 (3)          |
| C12_5 | 34 (3)          | 83 (3)          | 52.1 (16)       | 0.0 (17)        | 0 (2)           | 5.7 (18)        |
| C13_5 | 91 (7)          | 76 (7)          | 71 (6)          | 17 (5)          | 46 (6)          | 30 (5)          |
| O1_6  | 49 (2)          | 61 (3)          | 60 (3)          | -4 (2)          | 7 (2)           | -1 (2)          |
| O2_6  | 91 (7)          | 88 (4)          | 48 (3)          | 15 (2)          | 15 (3)          | 26 (5)          |
| O3_6  | 78 (4)          | 76 (4)          | 49.8 (13)       | -7.9 (16)       | 10.7 (17)       | -8 (2)          |
| N1_6  | 47.6 (12)       | 78 (2)          | 39.1 (15)       | 5.3 (13)        | 4.1 (10)        | 11.3 (14)       |
| N2_6  | 52 (4)          | 69 (3)          | 36 (2)          | -2 (2)          | 0 (2)           | -2 (3)          |
| N3_6  | 62 (4)          | 71 (2)          | 53.4 (14)       | 5.6 (15)        | 16.5 (16)       | 5 (3)           |
| C2_6  | 44 (2)          | 55 (3)          | 74 (4)          | -5 (3)          | 13 (2)          | 0 (2)           |



**Table S12. Anisotropic Displacement Parameters ( $\text{\AA}^2 \times 10^3$ ) for 4b<sub>2</sub>. The Anisotropic displacement factor exponent takes the form:  $-2\pi^2[h^2a^{*2}U_{11}+2hka^*b^*U_{12}+\dots]$ .**

| Atom  | U <sub>11</sub> | U <sub>22</sub> | U <sub>33</sub> | U <sub>23</sub> | U <sub>13</sub> | U <sub>12</sub> |
|-------|-----------------|-----------------|-----------------|-----------------|-----------------|-----------------|
| C3_6  | 40 (2)          | 65 (3)          | 49 (3)          | 3 (2)           | 8 (2)           | 5 (2)           |
| C4_6  | 43 (3)          | 59 (4)          | 49 (3)          | 9 (3)           | 3 (3)           | 9 (2)           |
| C5_6  | 48 (3)          | 60 (3)          | 47 (3)          | 7 (2)           | 2 (2)           | 6 (2)           |
| C6_6  | 48 (3)          | 77 (5)          | 34 (4)          | 3 (3)           | 2 (3)           | 7 (3)           |
| C7_6  | 36 (3)          | 72 (4)          | 43 (3)          | 10 (2)          | 6 (3)           | 10 (3)          |
| C8_6  | 37 (2)          | 70 (3)          | 50 (3)          | 2 (2)           | 5 (2)           | 3 (2)           |
| C9_6  | 53 (3)          | 68 (4)          | 54 (4)          | 2 (3)           | 7 (3)           | -1 (3)          |
| C10_6 | 39 (3)          | 98 (6)          | 47 (4)          | 2 (4)           | 11 (4)          | 19 (4)          |
| C11_6 | 35 (3)          | 78 (3)          | 42 (2)          | 6 (2)           | 14 (2)          | 17 (3)          |
| C12_6 | 48 (5)          | 67 (4)          | 47 (2)          | -2 (2)          | 13 (2)          | -6 (4)          |
| C13_6 | 80 (5)          | 76 (3)          | 57 (2)          | 4 (2)           | 22 (2)          | 16 (3)          |

**Table S13. Bond Lengths for 4b<sub>2</sub>.**

| Atom | Atom              | Length/ $\text{\AA}$ | Atom | Atom  | Length/ $\text{\AA}$ |
|------|-------------------|----------------------|------|-------|----------------------|
| C21  | C2_1              | 1.504 (3)            | C5_3 | C9_3  | 1.498 (3)            |
| C21  | C2_2              | 1.503 (3)            | C6_3 | C7_3  | 1.389 (3)            |
| C22  | C2_3              | 1.518 (6)            | C7_3 | C8_3  | 1.389 (3)            |
| C22  | C2_4              | 1.518 (6)            | C7_3 | C10_3 | 1.503 (3)            |
| C6   | C2_5              | 1.510 (10)           | O1_4 | C2_4  | 1.405 (3)            |
| C6   | C2_6              | 1.540 (8)            | O1_4 | C3_4  | 1.366 (3)            |
| O1_1 | C2_1              | 1.405 (3)            | O2_4 | C11_4 | 1.215 (2)            |
| O1_1 | C3_1              | 1.366 (2)            | O3_4 | C12_4 | 1.214 (2)            |
| O2_1 | C11_1             | 1.216 (2)            | N1_4 | N2_4  | 1.443 (2)            |
| O3_1 | N1_1              | 3.446 (2)            | N1_4 | C6_4  | 1.435 (2)            |
| O3_1 | C12_1             | 1.213 (2)            | N1_4 | C11_4 | 1.364 (2)            |
| N1_1 | N2_1              | 1.4411 (19)          | N2_4 | C12_4 | 1.406 (2)            |
| N1_1 | C6_1              | 1.431 (2)            | N3_4 | C11_4 | 1.386 (3)            |
| N1_1 | C11_1             | 1.363 (2)            | N3_4 | C12_4 | 1.357 (2)            |
| N2_1 | C12_1             | 1.409 (2)            | N3_4 | C13_4 | 1.452 (3)            |
| N2_1 | N2_2 <sup>1</sup> | 1.379 (3)            | C3_4 | C4_4  | 1.392 (3)            |
| N3_1 | C11_1             | 1.385 (2)            | C3_4 | C8_4  | 1.385 (3)            |
| N3_1 | C12_1             | 1.358 (2)            | C4_4 | C5_4  | 1.385 (3)            |
| N3_1 | C13_1             | 1.453 (2)            | C5_4 | C6_4  | 1.397 (3)            |
| C3_1 | C4_1              | 1.390 (3)            | C5_4 | C9_4  | 1.499 (3)            |
| C3_1 | C8_1              | 1.386 (3)            | C6_4 | C7_4  | 1.390 (3)            |
| C4_1 | C5_1              | 1.389 (3)            | C7_4 | C8_4  | 1.389 (3)            |
| C5_1 | C6_1              | 1.398 (3)            | C7_4 | C10_4 | 1.503 (3)            |

**Table S13. Bond Lengths for 4b<sub>2</sub>.**

| Atom | Atom              | Length/Å    | Atom | Atom              | Length/Å   |
|------|-------------------|-------------|------|-------------------|------------|
| C5_1 | C9_1              | 1.499 (3)   | O1_5 | C2_5              | 1.405 (3)  |
| C6_1 | C7_1              | 1.390 (3)   | O1_5 | C3_5              | 1.366 (3)  |
| C7_1 | C8_1              | 1.386 (3)   | O2_5 | C11_5             | 1.214 (2)  |
| C7_1 | C10_1             | 1.502 (3)   | O3_5 | C12_5             | 1.213 (2)  |
| O1_2 | C2_2              | 1.407 (2)   | N1_5 | N2_5              | 1.443 (2)  |
| O1_2 | C3_2              | 1.367 (2)   | N1_5 | C6_5              | 1.432 (2)  |
| O2_2 | C11_2             | 1.214 (2)   | N1_5 | C11_5             | 1.363 (2)  |
| O3_2 | C12_2             | 1.213 (2)   | N2_5 | C12_5             | 1.407 (2)  |
| N1_2 | N2_2              | 1.4427 (18) | N2_5 | N2_6 <sup>1</sup> | 1.356 (13) |
| N1_2 | C6_2              | 1.432 (2)   | N3_5 | C11_5             | 1.387 (3)  |
| N1_2 | C11_2             | 1.362 (2)   | N3_5 | C12_5             | 1.357 (2)  |
| N2_2 | C12_2             | 1.406 (2)   | N3_5 | C13_5             | 1.452 (3)  |
| N3_2 | C11_2             | 1.387 (2)   | C3_5 | C4_5              | 1.391 (3)  |
| N3_2 | C12_2             | 1.356 (2)   | C3_5 | C8_5              | 1.387 (3)  |
| N3_2 | C13_2             | 1.450 (2)   | C4_5 | C5_5              | 1.387 (3)  |
| C3_2 | C4_2              | 1.392 (3)   | C5_5 | C6_5              | 1.398 (3)  |
| C3_2 | C8_2              | 1.386 (3)   | C5_5 | C9_5              | 1.499 (3)  |
| C4_2 | C5_2              | 1.384 (3)   | C6_5 | C7_5              | 1.390 (3)  |
| C5_2 | C6_2              | 1.397 (3)   | C7_5 | C8_5              | 1.386 (3)  |
| C5_2 | C9_2              | 1.498 (3)   | C7_5 | C10_5             | 1.503 (3)  |
| C6_2 | C7_2              | 1.389 (2)   | O1_6 | C2_6              | 1.404 (3)  |
| C7_2 | C8_2              | 1.389 (3)   | O1_6 | C3_6              | 1.366 (3)  |
| C7_2 | C10_2             | 1.503 (3)   | O2_6 | C11_6             | 1.215 (2)  |
| O1_3 | C2_3              | 1.406 (3)   | O3_6 | C12_6             | 1.213 (2)  |
| O1_3 | C3_3              | 1.366 (3)   | N1_6 | N2_6              | 1.443 (2)  |
| O2_3 | C11_3             | 1.216 (3)   | N1_6 | C6_6              | 1.434 (2)  |
| O3_3 | C12_3             | 1.214 (2)   | N1_6 | C11_6             | 1.364 (2)  |
| N1_3 | N2_3              | 1.443 (2)   | N2_6 | C12_6             | 1.406 (2)  |
| N1_3 | C6_3              | 1.437 (2)   | N3_6 | C11_6             | 1.386 (3)  |
| N1_3 | C11_3             | 1.366 (2)   | N3_6 | C12_6             | 1.357 (2)  |
| N2_3 | C12_3             | 1.406 (2)   | N3_6 | C13_6             | 1.451 (3)  |
| N2_3 | N2_4 <sup>1</sup> | 1.521 (13)  | C3_6 | C4_6              | 1.389 (3)  |
| N3_3 | C11_3             | 1.387 (3)   | C3_6 | C8_6              | 1.388 (3)  |
| N3_3 | C12_3             | 1.356 (2)   | C4_6 | C5_6              | 1.388 (3)  |
| N3_3 | C13_3             | 1.451 (3)   | C5_6 | C6_6              | 1.397 (3)  |
| C3_3 | C4_3              | 1.392 (3)   | C5_6 | C9_6              | 1.499 (3)  |
| C3_3 | C8_3              | 1.386 (3)   | C6_6 | C7_6              | 1.390 (3)  |
| C4_3 | C5_3              | 1.385 (3)   | C7_6 | C8_6              | 1.387 (3)  |
| C5_3 | C6_3              | 1.397 (3)   | C7_6 | C10_6             | 1.503 (3)  |

**Table S14. Bond Angles for 4b<sub>2</sub>.**

| Atom              | Atom  | Atom  | Angle/°     | Atom  | Atom  | Atom              | Angle/°     |
|-------------------|-------|-------|-------------|-------|-------|-------------------|-------------|
| C2_2              | C21   | C2_1  | 114.5 (3)   | O3_3  | C12_3 | N3_3              | 129.2 (3)   |
| C2_3              | C22   | C2_4  | 111.3 (6)   | N3_3  | C12_3 | N2_3              | 106.13 (19) |
| C2_5              | C6    | C2_6  | 111.4 (6)   | C3_4  | O1_4  | C2_4              | 120.6 (3)   |
| C3_1              | O1_1  | C2_1  | 120.11 (18) | C6_4  | N1_4  | N2_4              | 117.4 (2)   |
| C12_1             | O3_1  | N1_1  | 12.84 (12)  | C11_4 | N1_4  | N2_4              | 107.16 (18) |
| C6_1              | N1_1  | N2_1  | 118.12 (15) | C11_4 | N1_4  | C6_4              | 124.9 (3)   |
| C11_1             | N1_1  | N2_1  | 107.71 (14) | N1_4  | N2_4  | N2_3 <sup>1</sup> | 123.9 (9)   |
| C11_1             | N1_1  | C6_1  | 125.93 (17) | C12_4 | N2_4  | N2_3 <sup>1</sup> | 103.4 (6)   |
| C12_1             | N2_1  | N1_1  | 106.20 (13) | C12_4 | N2_4  | N1_4              | 106.60 (18) |
| N2_2 <sup>1</sup> | N2_1  | N1_1  | 112.20 (18) | C11_4 | N3_4  | C13_4             | 124.0 (3)   |
| N2_2 <sup>1</sup> | N2_1  | C12_1 | 117.26 (19) | C12_4 | N3_4  | C11_4             | 111.40 (18) |
| C11_1             | N3_1  | C13_1 | 124.14 (18) | C12_4 | N3_4  | C13_4             | 124.6 (3)   |
| C12_1             | N3_1  | C11_1 | 111.39 (15) | O1_4  | C2_4  | C22               | 107.1 (4)   |
| C12_1             | N3_1  | C13_1 | 124.33 (19) | O1_4  | C3_4  | C4_4              | 118.1 (2)   |
| O1_1              | C2_1  | C21   | 107.8 (3)   | O1_4  | C3_4  | C8_4              | 121.6 (2)   |
| O1_1              | C3_1  | C4_1  | 121.23 (19) | C8_4  | C3_4  | C4_4              | 120.2 (2)   |
| O1_1              | C3_1  | C8_1  | 118.18 (19) | C5_4  | C4_4  | C3_4              | 120.5 (2)   |
| C8_1              | C3_1  | C4_1  | 120.56 (19) | C4_4  | C5_4  | C6_4              | 117.9 (2)   |
| C5_1              | C4_1  | C3_1  | 120.0 (2)   | C4_4  | C5_4  | C9_4              | 120.1 (3)   |
| C4_1              | C5_1  | C6_1  | 118.10 (19) | C6_4  | C5_4  | C9_4              | 122.0 (2)   |
| C4_1              | C5_1  | C9_1  | 120.3 (2)   | C5_4  | C6_4  | N1_4              | 119.5 (2)   |
| C6_1              | C5_1  | C9_1  | 121.57 (19) | C7_4  | C6_4  | N1_4              | 117.8 (2)   |
| C5_1              | C6_1  | N1_1  | 119.80 (18) | C7_4  | C6_4  | C5_4              | 122.7 (2)   |
| C7_1              | C6_1  | N1_1  | 117.50 (18) | C6_4  | C7_4  | C10_4             | 121.7 (2)   |
| C7_1              | C6_1  | C5_1  | 122.68 (18) | C8_4  | C7_4  | C6_4              | 117.7 (2)   |
| C6_1              | C7_1  | C10_1 | 122.45 (19) | C8_4  | C7_4  | C10_4             | 120.5 (2)   |
| C8_1              | C7_1  | C6_1  | 117.7 (2)   | C3_4  | C8_4  | C7_4              | 120.7 (3)   |
| C8_1              | C7_1  | C10_1 | 119.87 (19) | O2_4  | C11_4 | N1_4              | 127.0 (3)   |
| C3_1              | C8_1  | C7_1  | 120.9 (2)   | O2_4  | C11_4 | N3_4              | 125.8 (3)   |
| O2_1              | C11_1 | N1_1  | 126.73 (19) | N1_4  | C11_4 | N3_4              | 107.17 (18) |
| O2_1              | C11_1 | N3_1  | 126.29 (18) | O3_4  | C12_4 | N2_4              | 124.5 (2)   |
| N1_1              | C11_1 | N3_1  | 106.97 (15) | O3_4  | C12_4 | N3_4              | 129.3 (3)   |
| O3_1              | C12_1 | N2_1  | 124.24 (18) | N3_4  | C12_4 | N2_4              | 106.22 (19) |
| O3_1              | C12_1 | N3_1  | 129.38 (19) | C3_5  | O1_5  | C2_5              | 120.6 (3)   |
| N3_1              | C12_1 | N2_1  | 106.37 (15) | C6_5  | N1_5  | N2_5              | 117.7 (2)   |
| C3_2              | O1_2  | C2_2  | 120.03 (18) | C11_5 | N1_5  | N2_5              | 107.1 (2)   |
| C6_2              | N1_2  | N2_2  | 117.64 (15) | C11_5 | N1_5  | C6_5              | 125.9 (3)   |

**Table S14. Bond Angles for 4b<sub>2</sub>.**

| Atom              | Atom  | Atom              | Angle/°     | Atom              | Atom  | Atom  | Angle/°     |
|-------------------|-------|-------------------|-------------|-------------------|-------|-------|-------------|
| C11_2             | N1_2  | N2_2              | 107.16 (14) | C12_5             | N2_5  | N1_5  | 106.12 (19) |
| C11_2             | N1_2  | C6_2              | 125.06 (17) | N2_6 <sup>1</sup> | N2_5  | N1_5  | 105.3 (7)   |
| N2_1 <sup>1</sup> | N2_2  | N1_2              | 114.84 (17) | N2_6 <sup>1</sup> | N2_5  | C12_5 | 134.6 (7)   |
| N2_1 <sup>1</sup> | N2_2  | C12_2             | 119.37 (17) | C11_5             | N3_5  | C13_5 | 123.9 (3)   |
| C12_2             | N2_2  | N1_2              | 106.12 (14) | C12_5             | N3_5  | C11_5 | 111.32 (19) |
| C11_2             | N3_2  | C13_2             | 123.47 (18) | C12_5             | N3_5  | C13_5 | 124.7 (3)   |
| C12_2             | N3_2  | C11_2             | 111.38 (16) | O1_5              | C2_5  | C6    | 104.8 (6)   |
| C12_2             | N3_2  | C13_2             | 125.10 (18) | O1_5              | C3_5  | C4_5  | 120.0 (3)   |
| O1_2              | C2_2  | C21               | 108.6 (2)   | O1_5              | C3_5  | C8_5  | 119.1 (3)   |
| O1_2              | C3_2  | C4_2              | 116.99 (19) | C8_5              | C3_5  | C4_5  | 120.2 (3)   |
| O1_2              | C3_2  | C8_2              | 122.46 (19) | C5_5              | C4_5  | C3_5  | 120.4 (2)   |
| C8_2              | C3_2  | C4_2              | 120.5 (2)   | C4_5              | C5_5  | C6_5  | 118.0 (2)   |
| C5_2              | C4_2  | C3_2              | 120.5 (2)   | C4_5              | C5_5  | C9_5  | 120.0 (2)   |
| C4_2              | C5_2  | C6_2              | 117.66 (19) | C6_5              | C5_5  | C9_5  | 122.0 (2)   |
| C4_2              | C5_2  | C9_2              | 120.39 (19) | C5_5              | C6_5  | N1_5  | 120.0 (2)   |
| C6_2              | C5_2  | C9_2              | 121.95 (19) | C7_5              | C6_5  | N1_5  | 117.3 (2)   |
| C5_2              | C6_2  | N1_2              | 119.55 (17) | C7_5              | C6_5  | C5_5  | 122.6 (2)   |
| C7_2              | C6_2  | N1_2              | 117.51 (17) | C6_5              | C7_5  | C10_5 | 122.0 (2)   |
| C7_2              | C6_2  | C5_2              | 122.93 (18) | C8_5              | C7_5  | C6_5  | 117.8 (2)   |
| C6_2              | C7_2  | C10_2             | 121.27 (19) | C8_5              | C7_5  | C10_5 | 120.2 (2)   |
| C8_2              | C7_2  | C6_2              | 117.80 (19) | C3_5              | C8_5  | C7_5  | 120.9 (2)   |
| C8_2              | C7_2  | C10_2             | 120.93 (19) | O2_5              | C11_5 | N1_5  | 127.3 (3)   |
| C3_2              | C8_2  | C7_2              | 120.4 (2)   | O2_5              | C11_5 | N3_5  | 125.8 (3)   |
| O2_2              | C11_2 | N1_2              | 127.5 (2)   | N1_5              | C11_5 | N3_5  | 106.87 (18) |
| O2_2              | C11_2 | N3_2              | 125.6 (2)   | O3_5              | C12_5 | N2_5  | 124.3 (2)   |
| N1_2              | C11_2 | N3_2              | 106.85 (15) | O3_5              | C12_5 | N3_5  | 129.6 (3)   |
| O3_2              | C12_2 | N2_2              | 124.23 (18) | N3_5              | C12_5 | N2_5  | 106.16 (19) |
| O3_2              | C12_2 | N3_2              | 129.8 (2)   | C3_6              | O1_6  | C2_6  | 120.8 (2)   |
| N3_2              | C12_2 | N2_2              | 105.99 (15) | C6_6              | N1_6  | N2_6  | 117.5 (2)   |
| C3_3              | O1_3  | C2_3              | 120.5 (2)   | C11_6             | N1_6  | N2_6  | 107.22 (19) |
| C6_3              | N1_3  | N2_3              | 117.2 (2)   | C11_6             | N1_6  | C6_6  | 124.7 (3)   |
| C11_3             | N1_3  | N2_3              | 107.21 (18) | N2_5 <sup>1</sup> | N2_6  | N1_6  | 114.8 (9)   |
| C11_3             | N1_3  | C6_3              | 123.8 (3)   | N2_5 <sup>1</sup> | N2_6  | C12_6 | 104.8 (7)   |
| N1_3              | N2_3  | N2_4 <sup>1</sup> | 108.2 (7)   | C12_6             | N2_6  | N1_6  | 106.49 (18) |
| C12_3             | N2_3  | N1_3              | 106.75 (18) | C11_6             | N3_6  | C13_6 | 123.9 (2)   |
| C12_3             | N2_3  | N2_4 <sup>1</sup> | 130.9 (6)   | C12_6             | N3_6  | C11_6 | 111.34 (18) |
| C11_3             | N3_3  | C13_3             | 123.7 (2)   | C12_6             | N3_6  | C13_6 | 124.8 (2)   |
| C12_3             | N3_3  | C11_3             | 111.40 (19) | O1_6              | C2_6  | C6    | 109.4 (4)   |
| C12_3             | N3_3  | C13_3             | 124.9 (2)   | O1_6              | C3_6  | C4_6  | 120.6 (2)   |
| O1_3              | C2_3  | C22               | 105.4 (4)   | O1_6              | C3_6  | C8_6  | 119.0 (2)   |

**Table S14. Bond Angles for 4b<sub>2</sub>.**

| Atom | Atom  | Atom  | Angle/°    | Atom | Atom  | Atom  | Angle/°    |
|------|-------|-------|------------|------|-------|-------|------------|
| O1_3 | C3_3  | C4_3  | 117.9(2)   | C8_6 | C3_6  | C4_6  | 120.3(2)   |
| O1_3 | C3_3  | C8_3  | 121.5(2)   | C5_6 | C4_6  | C3_6  | 120.3(2)   |
| C8_3 | C3_3  | C4_3  | 120.6(2)   | C4_6 | C5_6  | C6_6  | 117.9(2)   |
| C5_3 | C4_3  | C3_3  | 120.4(2)   | C4_6 | C5_6  | C9_6  | 120.4(2)   |
| C4_3 | C5_3  | C6_3  | 117.7(2)   | C6_6 | C5_6  | C9_6  | 121.7(2)   |
| C4_3 | C5_3  | C9_3  | 120.3(2)   | C5_6 | C6_6  | N1_6  | 119.8(2)   |
| C6_3 | C5_3  | C9_3  | 122.0(2)   | C7_6 | C6_6  | N1_6  | 117.3(2)   |
| C5_3 | C6_3  | N1_3  | 119.2(2)   | C7_6 | C6_6  | C5_6  | 122.9(2)   |
| C7_3 | C6_3  | N1_3  | 117.8(2)   | C6_6 | C7_6  | C10_6 | 121.5(2)   |
| C7_3 | C6_3  | C5_3  | 122.9(2)   | C8_6 | C7_6  | C6_6  | 117.6(2)   |
| C6_3 | C7_3  | C10_3 | 121.5(2)   | C8_6 | C7_6  | C10_6 | 120.8(3)   |
| C8_3 | C7_3  | C6_3  | 117.8(2)   | C7_6 | C8_6  | C3_6  | 120.9(2)   |
| C8_3 | C7_3  | C10_3 | 120.7(3)   | O2_6 | C11_6 | N1_6  | 127.0(3)   |
| C3_3 | C8_3  | C7_3  | 120.5(2)   | O2_6 | C11_6 | N3_6  | 125.7(3)   |
| O2_3 | C11_3 | N1_3  | 126.5(3)   | N1_6 | C11_6 | N3_6  | 107.15(17) |
| O2_3 | C11_3 | N3_3  | 125.3(3)   | O3_6 | C12_6 | N2_6  | 124.5(2)   |
| N1_3 | C11_3 | N3_3  | 107.24(18) | O3_6 | C12_6 | N3_6  | 129.2(3)   |
| O3_3 | C12_3 | N2_3  | 124.6(2)   | N3_6 | C12_6 | N2_6  | 106.25(19) |

<sup>1</sup>/2-X,+Y,1-Z**Table S15. Torsion Angles for 4b<sub>2</sub>.**

| A                 | B    | C     | D     | Angle/°   | A                 | B    | C     | D     | Angle/°    |
|-------------------|------|-------|-------|-----------|-------------------|------|-------|-------|------------|
| O1_1              | C3_1 | C4_1  | C5_1  | -175.3(3) | C13_3             | N3_3 | C12_3 | N2_3  | 173.5(9)   |
| O1_1              | C3_1 | C8_1  | C7_1  | 175.3(3)  | O1_4              | C3_4 | C4_4  | C5_4  | 173.8(6)   |
| N1_1              | O3_1 | C12_1 | N2_1  | -17.8(5)  | O1_4              | C3_4 | C8_4  | C7_4  | -178.2(9)  |
| N1_1              | O3_1 | C12_1 | N3_1  | 163.4(10) | N1_4              | N2_4 | C12_4 | O3_4  | -170.1(12) |
| N1_1              | N2_1 | C12_1 | O3_1  | 170.3(3)  | N1_4              | N2_4 | C12_4 | N3_4  | 10.8(11)   |
| N1_1              | N2_1 | C12_1 | N3_1  | -10.6(3)  | N1_4              | C6_4 | C7_4  | C8_4  | 172.0(8)   |
| N1_1              | C6_1 | C7_1  | C8_1  | -176.2(2) | N1_4              | C6_4 | C7_4  | C10_4 | -7.0(8)    |
| N1_1              | C6_1 | C7_1  | C10_1 | 2.7(4)    | N2_4 <sup>1</sup> | N2_3 | C12_3 | O3_3  | -36.0(14)  |
| N2_1              | N1_1 | C6_1  | C5_1  | -68.2(3)  | N2_4 <sup>1</sup> | N2_3 | C12_3 | N3_3  | 145.0(10)  |
| N2_1              | N1_1 | C6_1  | C7_1  | 110.4(3)  | N2_4              | N1_4 | C6_4  | C5_4  | 76.4(10)   |
| N2_1              | N1_1 | C11_1 | O2_1  | 170.5(3)  | N2_4              | N1_4 | C6_4  | C7_4  | -100.4(7)  |
| N2_1              | N1_1 | C11_1 | N3_1  | -8.4(3)   | N2_4              | N1_4 | C11_4 | O2_4  | -172.4(13) |
| N2_1 <sup>1</sup> | N2_2 | C12_2 | O3_2  | 35.2(4)   | N2_4              | N1_4 | C11_4 | N3_4  | 8.9(9)     |
| N2_1 <sup>1</sup> | N2_2 | C12_2 | N3_2  | -146.1(2) | C2_4              | C22  | C2_3  | O1_3  | 67.8(8)    |
| C2_1              | C21  | C2_2  | O1_2  | -54.8(4)  | C2_4              | O1_4 | C3_4  | C4_4  | -163.3(6)  |
| C2_1              | O1_1 | C3_1  | C4_1  | 8.0(4)    | C2_4              | O1_4 | C3_4  | C8_4  | 13.2(11)   |

**Table S15. Torsion Angles for 4b<sub>2</sub>.**

| A                 | B    | C     | D                 | Angle/°   | A                 | B    | C     | D                 | Angle/°    |
|-------------------|------|-------|-------------------|-----------|-------------------|------|-------|-------------------|------------|
| C2_1              | O1_1 | C3_1  | C8_1              | -170.2(3) | C3_4              | O1_4 | C2_4  | C22               | 170.5(6)   |
| C3_1              | O1_1 | C2_1  | C21               | 171.6(3)  | C3_4              | C4_4 | C5_4  | C6_4              | 3.4(11)    |
| C3_1              | C4_1 | C5_1  | C6_1              | -0.3(4)   | C3_4              | C4_4 | C5_4  | C9_4              | -178.1(8)  |
| C3_1              | C4_1 | C5_1  | C9_1              | 177.2(3)  | C4_4              | C3_4 | C8_4  | C7_4              | -1.8(16)   |
| C4_1              | C3_1 | C8_1  | C7_1              | -2.9(4)   | C4_4              | C5_4 | C6_4  | N1_4              | -176.3(5)  |
| C4_1              | C5_1 | C6_1  | N1_1              | 176.1(2)  | C4_4              | C5_4 | C6_4  | C7_4              | 0.4(12)    |
| C4_1              | C5_1 | C6_1  | C7_1              | -2.3(4)   | C5_4              | C6_4 | C7_4  | C8_4              | -4.7(12)   |
| C5_1              | C6_1 | C7_1  | C8_1              | 2.3(4)    | C5_4              | C6_4 | C7_4  | C10_4             | 176.2(7)   |
| C5_1              | C6_1 | C7_1  | C10_1             | -178.9(3) | C6_4              | N1_4 | N2_4  | N2_3 <sup>1</sup> | 81.6(9)    |
| C6_1              | N1_1 | N2_1  | C12_1             | 162.3(2)  | C6_4              | N1_4 | N2_4  | C12_4             | -158.9(7)  |
| C6_1              | N1_1 | N2_1  | N2_2 <sup>1</sup> | -68.4(2)  | C6_4              | N1_4 | C11_4 | O2_4              | -29.0(15)  |
| C6_1              | N1_1 | C11_1 | O2_1              | 23.1(5)   | C6_4              | N1_4 | C11_4 | N3_4              | 152.3(7)   |
| C6_1              | N1_1 | C11_1 | N3_1              | -155.8(2) | C6_4              | C7_4 | C8_4  | C3_4              | 5.4(16)    |
| C6_1              | C7_1 | C8_1  | C3_1              | 0.4(4)    | C8_4              | C3_4 | C4_4  | C5_4              | -2.7(11)   |
| C8_1              | C3_1 | C4_1  | C5_1              | 2.9(4)    | C9_4              | C5_4 | C6_4  | N1_4              | 5.2(12)    |
| C9_1              | C5_1 | C6_1  | N1_1              | -1.4(4)   | C9_4              | C5_4 | C6_4  | C7_4              | -178.1(8)  |
| C9_1              | C5_1 | C6_1  | C7_1              | -179.8(3) | C10_4             | C7_4 | C8_4  | C3_4              | -175.5(9)  |
| C10_1             | C7_1 | C8_1  | C3_1              | -178.5(3) | C11_4             | N1_4 | N2_4  | N2_3 <sup>1</sup> | -131.8(8)  |
| C11_1             | N1_1 | N2_1  | C12_1             | 11.9(3)   | C11_4             | N1_4 | N2_4  | C12_4             | -12.3(9)   |
| C11_1             | N1_1 | N2_1  | N2_2 <sup>1</sup> | 141.2(2)  | C11_4             | N1_4 | C6_4  | C5_4              | -63.7(10)  |
| C11_1             | N1_1 | C6_1  | C5_1              | 76.2(3)   | C11_4             | N1_4 | C6_4  | C7_4              | 119.5(7)   |
| C11_1             | N1_1 | C6_1  | C7_1              | -105.2(3) | C11_4             | N3_4 | C12_4 | O3_4              | 175.3(13)  |
| C11_1             | N3_1 | C12_1 | O3_1              | -175.2(3) | C11_4             | N3_4 | C12_4 | N2_4              | -5.6(13)   |
| C11_1             | N3_1 | C12_1 | N2_1              | 5.8(3)    | C12_4             | N3_4 | C11_4 | O2_4              | 179.0(13)  |
| C12_1             | N3_1 | C11_1 | O2_1              | -177.2(3) | C12_4             | N3_4 | C11_4 | N1_4              | -2.2(12)   |
| C12_1             | N3_1 | C11_1 | N1_1              | 1.7(3)    | C13_4             | N3_4 | C11_4 | O2_4              | 1(2)       |
| C13_1             | N3_1 | C11_1 | O2_1              | 6.9(5)    | C13_4             | N3_4 | C11_4 | N1_4              | 179.7(14)  |
| C13_1             | N3_1 | C11_1 | N1_1              | -174.2(3) | C13_4             | N3_4 | C12_4 | O3_4              | -7(2)      |
| C13_1             | N3_1 | C12_1 | O3_1              | 0.7(5)    | C13_4             | N3_4 | C12_4 | N2_4              | 172.5(15)  |
| C13_1             | N3_1 | C12_1 | N2_1              | -178.3(3) | O1_5              | C3_5 | C4_5  | C5_5              | 173.5(10)  |
| O1_2              | C3_2 | C4_2  | C5_2              | -177.5(2) | O1_5              | C3_5 | C8_5  | C7_5              | -174.1(9)  |
| O1_2              | C3_2 | C8_2  | C7_2              | 174.6(3)  | N1_5              | N2_5 | C12_5 | O3_5              | -164.9(12) |
| N1_2              | N2_2 | C12_2 | O3_2              | 166.8(3)  | N1_5              | N2_5 | C12_5 | N3_5              | 13.2(11)   |
| N1_2              | N2_2 | C12_2 | N3_2              | -14.5(3)  | N1_5              | C6_5 | C7_5  | C8_5              | 173.9(5)   |
| N1_2              | C6_2 | C7_2  | C8_2              | -178.0(2) | N1_5              | C6_5 | C7_5  | C10_5             | -6.9(9)    |
| N1_2              | C6_2 | C7_2  | C10_2             | 1.8(4)    | N2_5              | N1_5 | C6_5  | C5_5              | 70.4(10)   |
| N2_2 <sup>1</sup> | N2_1 | C12_1 | O3_1              | 44.0(4)   | N2_5              | N1_5 | C6_5  | C7_5              | -105.4(8)  |
| N2_2 <sup>1</sup> | N2_1 | C12_1 | N3_1              | -137.0(2) | N2_5              | N1_5 | C11_5 | O2_5              | -170.2(12) |
| N2_2              | N1_2 | C6_2  | C5_2              | -69.9(3)  | N2_5              | N1_5 | C11_5 | N3_5              | 12.5(9)    |
| N2_2              | N1_2 | C6_2  | C7_2              | 110.3(2)  | N2_5 <sup>1</sup> | N2_6 | C12_6 | O3_6              | -48.7(11)  |

**Table S15. Torsion Angles for 4b<sub>2</sub>.**

| A     | B     | C     | D                 | Angle/°    | A                 | B    | C     | D                 | Angle/°     |
|-------|-------|-------|-------------------|------------|-------------------|------|-------|-------------------|-------------|
| N2_2  | N1_2  | C11_2 | O2_2              | 168.0 (3)  | N2_5 <sup>1</sup> | N2_6 | C12_6 | N3_6              | 133.5 (8)   |
| N2_2  | N1_2  | C11_2 | N3_2              | -11.1 (3)  | C2_5              | C6_5 | C2_6  | O1_6              | -176.0 (6)  |
| C2_2  | C21_2 | C2_1  | O1_1              | -61.9 (4)  | C2_5              | O1_5 | C3_5  | C4_5              | 6.8 (18)    |
| C2_2  | O1_2  | C3_2  | C4_2              | -169.2 (3) | C2_5              | O1_5 | C3_5  | C8_5              | 177.5 (10)  |
| C2_2  | O1_2  | C3_2  | C8_2              | 12.5 (4)   | C3_5              | O1_5 | C2_5  | C6_5              | -169.7 (9)  |
| C3_2  | O1_2  | C2_2  | C21_2             | -175.5 (3) | C3_5              | C4_5 | C5_5  | C6_5              | -1.7 (13)   |
| C3_2  | C4_2  | C5_2  | C6_2              | 3.3 (4)    | C3_5              | C4_5 | C5_5  | C9_5              | 178.4 (11)  |
| C3_2  | C4_2  | C5_2  | C9_2              | -176.1 (3) | C4_5              | C3_5 | C8_5  | C7_5              | -3.4 (18)   |
| C4_2  | C3_2  | C8_2  | C7_2              | -3.6 (4)   | C4_5              | C5_5 | C6_5  | N1_5              | -174.3 (5)  |
| C4_2  | C5_2  | C6_2  | N1_2              | 175.3 (2)  | C4_5              | C5_5 | C6_5  | C7_5              | 1.3 (12)    |
| C4_2  | C5_2  | C6_2  | C7_2              | -4.9 (4)   | C5_5              | C6_5 | C7_5  | C8_5              | -1.8 (11)   |
| C5_2  | C6_2  | C7_2  | C8_2              | 2.2 (4)    | C5_5              | C6_5 | C7_5  | C10_5             | 177.4 (7)   |
| C5_2  | C6_2  | C7_2  | C10_2             | -178.0 (3) | C6_5              | N1_5 | N2_5  | C12_5             | -164.7 (6)  |
| C6_2  | N1_2  | N2_2  | N2_1 <sup>1</sup> | -62.6 (2)  | C6_5              | N1_5 | N2_5  | N2_6 <sup>1</sup> | 48.4 (10)   |
| C6_2  | N1_2  | N2_2  | C12_2             | 163.2 (2)  | C6_5              | N1_5 | C11_5 | O2_5              | -24.9 (13)  |
| C6_2  | N1_2  | C11_2 | O2_2              | 23.9 (5)   | C6_5              | N1_5 | C11_5 | N3_5              | 157.8 (7)   |
| C6_2  | N1_2  | C11_2 | N3_2              | -155.2 (2) | C6_5              | C7_5 | C8_5  | C3_5              | 2.8 (12)    |
| C6_2  | C7_2  | C8_2  | C3_2              | 2.1 (4)    | C8_5              | C3_5 | C4_5  | C5_5              | 2.8 (18)    |
| C8_2  | C3_2  | C4_2  | C5_2              | 0.8 (4)    | C9_5              | C5_5 | C6_5  | N1_5              | 5.6 (12)    |
| C9_2  | C5_2  | C6_2  | N1_2              | -5.2 (4)   | C9_5              | C5_5 | C6_5  | C7_5              | -178.8 (8)  |
| C9_2  | C5_2  | C6_2  | C7_2              | 174.6 (3)  | C10_5             | C7_5 | C8_5  | C3_5              | -176.4 (10) |
| C10_2 | C7_2  | C8_2  | C3_2              | -177.7 (3) | C11_5             | N1_5 | N2_5  | C12_5             | -16.1 (9)   |
| C11_2 | N1_2  | N2_2  | N2_1 <sup>1</sup> | 150.2 (2)  | C11_5             | N1_5 | N2_5  | N2_6 <sup>1</sup> | -162.9 (8)  |
| C11_2 | N1_2  | N2_2  | C12_2             | 16.1 (3)   | C11_5             | N1_5 | C6_5  | C5_5              | -71.7 (9)   |
| C11_2 | N1_2  | C6_2  | C5_2              | 70.8 (3)   | C11_5             | N1_5 | C6_5  | C7_5              | 112.5 (7)   |
| C11_2 | N1_2  | C6_2  | C7_2              | -109.0 (3) | C11_5             | N3_5 | C12_5 | O3_5              | 172.1 (13)  |
| C11_2 | N3_2  | C12_2 | O3_2              | -173.3 (3) | C11_5             | N3_5 | C12_5 | N2_5              | -5.9 (13)   |
| C11_2 | N3_2  | C12_2 | N2_2              | 8.1 (3)    | C12_5             | N3_5 | C11_5 | O2_5              | 178.3 (12)  |
| C12_2 | N3_2  | C11_2 | O2_2              | -177.1 (3) | C12_5             | N3_5 | C11_5 | N1_5              | -4.3 (12)   |
| C12_2 | N3_2  | C11_2 | N1_2              | 2.0 (4)    | C13_5             | N3_5 | C11_5 | O2_5              | -4 (2)      |
| C13_2 | N3_2  | C11_2 | O2_2              | 5.7 (6)    | C13_5             | N3_5 | C11_5 | N1_5              | 173.0 (14)  |
| C13_2 | N3_2  | C11_2 | N1_2              | -175.3 (3) | C13_5             | N3_5 | C12_5 | O3_5              | -5 (2)      |
| C13_2 | N3_2  | C12_2 | O3_2              | 3.9 (6)    | C13_5             | N3_5 | C12_5 | N2_5              | 176.8 (15)  |
| C13_2 | N3_2  | C12_2 | N2_2              | -174.6 (3) | O1_6              | C3_6 | C4_6  | C5_6              | 179.0 (7)   |
| O1_3  | C3_3  | C4_3  | C5_3              | 179.6 (7)  | O1_6              | C3_6 | C8_6  | C7_6              | 179.9 (7)   |
| O1_3  | C3_3  | C8_3  | C7_3              | 179.5 (9)  | N1_6              | N2_6 | C12_6 | O3_6              | -170.7 (7)  |
| N1_3  | N2_3  | C12_3 | O3_3              | -169.8 (8) | N1_6              | N2_6 | C12_6 | N3_6              | 11.5 (9)    |
| N1_3  | N2_3  | C12_3 | N3_3              | 11.3 (9)   | N1_6              | C6_6 | C7_6  | C8_6              | -178.9 (6)  |
| N1_3  | C6_3  | C7_3  | C8_3              | 177.3 (7)  | N1_6              | C6_6 | C7_6  | C10_6             | -1.0 (12)   |
| N1_3  | C6_3  | C7_3  | C10_3             | -0.8 (13)  | N2_6 <sup>1</sup> | N2_5 | C12_5 | O3_5              | -32.8 (19)  |

**Table S15. Torsion Angles for 4b<sub>2</sub>.**

| A                 | B    | C     | D                 | Angle/°     | A                 | B    | C     | D                 | Angle/°     |
|-------------------|------|-------|-------------------|-------------|-------------------|------|-------|-------------------|-------------|
| N2_3              | N1_3 | C6_3  | C5_3              | 69.3 (8)    | N2_6 <sup>1</sup> | N2_5 | C12_5 | N3_5              | 145.4 (15)  |
| N2_3              | N1_3 | C6_3  | C7_3              | -111.9 (8)  | N2_6              | N1_6 | C6_6  | C5_6              | 73.1 (8)    |
| N2_3              | N1_3 | C11_3 | O2_3              | -163.8 (17) | N2_6              | N1_6 | C6_6  | C7_6              | -108.4 (8)  |
| N2_3              | N1_3 | C11_3 | N3_3              | 5.4 (8)     | N2_6              | N1_6 | C11_6 | O2_6              | -175.5 (16) |
| N2_3 <sup>1</sup> | N2_4 | C12_4 | O3_4              | -38.1 (14)  | N2_6              | N1_6 | C11_6 | N3_6              | 8.8 (7)     |
| N2_3 <sup>1</sup> | N2_4 | C12_4 | N3_4              | 142.8 (12)  | C2_6              | C6_6 | C2_5  | O1_5              | 72.1 (9)    |
| C2_3              | C22  | C2_4  | O1_4              | -161.0 (5)  | C2_6              | O1_6 | C3_6  | C4_6              | 11.7 (9)    |
| C2_3              | O1_3 | C3_3  | C4_3              | 178.7 (7)   | C2_6              | O1_6 | C3_6  | C8_6              | -167.1 (5)  |
| C2_3              | O1_3 | C3_3  | C8_3              | 0.2 (14)    | C3_6              | O1_6 | C2_6  | C6_6              | 176.2 (6)   |
| C3_3              | O1_3 | C2_3  | C22               | -175.9 (7)  | C3_6              | C4_6 | C5_6  | C6_6              | 1.9 (12)    |
| C3_3              | C4_3 | C5_3  | C6_3              | -0.2 (10)   | C3_6              | C4_6 | C5_6  | C9_6              | 179.7 (7)   |
| C3_3              | C4_3 | C5_3  | C9_3              | 177.7 (7)   | C4_6              | C3_6 | C8_6  | C7_6              | 1.1 (10)    |
| C4_3              | C3_3 | C8_3  | C7_3              | 1.0 (15)    | C4_6              | C5_6 | C6_6  | N1_6              | 177.8 (6)   |
| C4_3              | C5_3 | C6_3  | N1_3              | -178.2 (5)  | C4_6              | C5_6 | C6_6  | C7_6              | -0.6 (12)   |
| C4_3              | C5_3 | C6_3  | C7_3              | 3.2 (11)    | C5_6              | C6_6 | C7_6  | C8_6              | -0.5 (13)   |
| C5_3              | C6_3 | C7_3  | C8_3              | -4.0 (14)   | C5_6              | C6_6 | C7_6  | C10_6             | 177.4 (9)   |
| C5_3              | C6_3 | C7_3  | C10_3             | 177.9 (10)  | C6_6              | N1_6 | N2_6  | N2_5 <sup>1</sup> | 85.4 (7)    |
| C6_3              | N1_3 | N2_3  | C12_3             | -154.8 (5)  | C6_6              | N1_6 | N2_6  | C12_6             | -159.1 (5)  |
| C6_3              | N1_3 | N2_3  | N2_4 <sup>1</sup> | 60.3 (7)    | C6_6              | N1_6 | C11_6 | O2_6              | -32.2 (17)  |
| C6_3              | N1_3 | C11_3 | O2_3              | -22.4 (18)  | C6_6              | N1_6 | C11_6 | N3_6              | 152.2 (5)   |
| C6_3              | N1_3 | C11_3 | N3_3              | 146.9 (6)   | C6_6              | C7_6 | C8_6  | C3_6              | 0.2 (12)    |
| C6_3              | C7_3 | C8_3  | C3_3              | 1.8 (14)    | C8_6              | C3_6 | C4_6  | C5_6              | -2.2 (12)   |
| C8_3              | C3_3 | C4_3  | C5_3              | -1.9 (13)   | C9_6              | C5_6 | C6_6  | N1_6              | 0.0 (9)     |
| C9_3              | C5_3 | C6_3  | N1_3              | 4.0 (9)     | C9_6              | C5_6 | C6_6  | C7_6              | -178.3 (8)  |
| C9_3              | C5_3 | C6_3  | C7_3              | -174.6 (8)  | C10_6             | C7_6 | C8_6  | C3_6              | -177.7 (8)  |
| C10_3             | C7_3 | C8_3  | C3_3              | 180.0 (10)  | C11_6             | N1_6 | N2_6  | N2_5 <sup>1</sup> | -128.1 (6)  |
| C11_3             | N1_3 | N2_3  | C12_3             | -10.4 (8)   | C11_6             | N1_6 | N2_6  | C12_6             | -12.7 (8)   |
| C11_3             | N1_3 | N2_3  | N2_4 <sup>1</sup> | -155.3 (7)  | C11_6             | N1_6 | C6_6  | C5_6              | -66.9 (7)   |
| C11_3             | N1_3 | C6_3  | C5_3              | -68.7 (8)   | C11_6             | N1_6 | C6_6  | C7_6              | 111.5 (8)   |
| C11_3             | N1_3 | C6_3  | C7_3              | 110.1 (8)   | C11_6             | N3_6 | C12_6 | O3_6              | 176.0 (8)   |
| C11_3             | N3_3 | C12_3 | O3_3              | 172.8 (9)   | C11_6             | N3_6 | C12_6 | N2_6              | -6.4 (11)   |
| C11_3             | N3_3 | C12_3 | N2_3              | -8.3 (11)   | C12_6             | N3_6 | C11_6 | O2_6              | -177.4 (16) |
| C12_3             | N3_3 | C11_3 | O2_3              | 171.2 (17)  | C12_6             | N3_6 | C11_6 | N1_6              | -1.6 (10)   |
| C12_3             | N3_3 | C11_3 | N1_3              | 1.8 (11)    | C13_6             | N3_6 | C11_6 | O2_6              | 2 (2)       |
| C13_3             | N3_3 | C11_3 | O2_3              | -11 (2)     | C13_6             | N3_6 | C11_6 | N1_6              | 177.9 (8)   |
| C13_3             | N3_3 | C11_3 | N1_3              | -180.0 (8)  | C13_6             | N3_6 | C12_6 | O3_6              | -3.6 (16)   |
| C13_3             | N3_3 | C12_3 | O3_3              | -5.4 (16)   | C13_6             | N3_6 | C12_6 | N2_6              | 174.1 (9)   |

<sup>1</sup>1/2-X,+Y,I-Z



**Table S16. Hydrogen Atom Coordinates ( $\text{\AA}\times 10^4$ ) and Isotropic Displacement Parameters ( $\text{\AA}^2\times 10^3$ ) for 4b<sub>2</sub>.**

| Atom   | <i>x</i> | <i>y</i> | <i>z</i> | U(eq)   |
|--------|----------|----------|----------|---------|
| H21A   | 3400.18  | -77.49   | 4167.07  | 105     |
| H21B   | 2875.71  | -217.21  | 4364.08  | 105     |
| H22A   | 2791.34  | 7225.98  | 5273.78  | 72      |
| H22B   | 3230.34  | 7526.86  | 5656.88  | 72      |
| H6A    | 3406.1   | 6942.12  | 6054.15  | 78      |
| H6B    | 3138.54  | 7476.96  | 5635.99  | 78      |
| H2A_1  | 3110.84  | 564.49   | 5054.1   | 92      |
| H2B_1  | 3475.93  | -145.68  | 5032.91  | 92      |
| H4_1   | 3650.32  | 520.43   | 5747.44  | 76      |
| H8_1   | 4409.33  | 1850.12  | 4881.39  | 77      |
| H9A_1  | 3665.24  | 1409.55  | 6711.01  | 102     |
| H9B_1  | 4223.54  | 1174.01  | 6874.96  | 102     |
| H9C_1  | 3844.05  | 559.67   | 6629.92  | 102     |
| H10A_1 | 4852.77  | 3141.27  | 5781.25  | 102     |
| H10B_1 | 4832.42  | 2948.22  | 5207.25  | 102     |
| H10C_1 | 5232.34  | 2545.86  | 5589.37  | 102     |
| H13A_1 | 5091.35  | 2308.99  | 7967.51  | 112     |
| H13B_1 | 5390.64  | 3000.66  | 7763.16  | 112     |
| H13C_1 | 5532.15  | 2148.27  | 7636.48  | 112     |
| H2A_2  | 3210.45  | 1190.4   | 4008.49  | 90      |
| H2B_2  | 2778.33  | 676.26   | 3741.6   | 90      |
| H4_2   | 2082.92  | 2080.7   | 4798.42  | 77      |
| H8_2   | 2517.94  | 1733.15  | 3441.71  | 74      |
| H9A_2  | 1526.54  | 3037.98  | 4954.56  | 106     |
| H9B_2  | 1168.03  | 3354.84  | 4501.86  | 106     |
| H9C_2  | 1670.91  | 3788.01  | 4673     | 106     |
| H10A_2 | 1637.45  | 2732.29  | 2780.34  | 103     |
| H10B_2 | 2186.97  | 2430.61  | 2753.3   | 103     |
| H10C_2 | 2093.52  | 3298.77  | 2884.09  | 103     |
| H13A_2 | 925.84   | 5622.37  | 3939.72  | 140     |
| H13B_2 | 649.05   | 5590.1   | 3395.68  | 140     |
| H13C_2 | 1232.14  | 5716.27  | 3473.24  | 140     |
| H2A_3  | 3593.73  | 6981.58  | 5000.81  | 80 (20) |
| H2B_3  | 3705.27  | 6418.34  | 5461.62  | 38 (15) |
| H4_3   | 2768.69  | 4966.82  | 4488.03  | 29 (10) |
| H8_3   | 4097.72  | 5941.39  | 4852.16  | 72      |
| H9A_3  | 3080.65  | 3344.51  | 4128.1   | 89      |
| H9B_3  | 3108.36  | 3742.5   | 3605.27  | 54 (15) |
| H9C_3  | 2671.04  | 3949.25  | 3931.19  | 81      |

**Table S16. Hydrogen Atom Coordinates ( $\text{\AA}\times 10^4$ ) and Isotropic Displacement Parameters ( $\text{\AA}^2\times 10^3$ ) for 4b<sub>2</sub>.**

| Atom   | <i>x</i> | <i>y</i> | <i>z</i> | U(eq)    |
|--------|----------|----------|----------|----------|
| H10A_3 | 4832.35  | 4618.2   | 4586.87  | 98       |
| H10B_3 | 4812.19  | 5516.93  | 4512.3   | 170 (50) |
| H10C_3 | 4750.56  | 4967.49  | 4044.41  | 46 (15)  |
| H13A_3 | 4444.15  | 1837.63  | 3410.75  | 113      |
| H13B_3 | 3865.7   | 1791.26  | 3246.48  | 113      |
| H13C_3 | 4063.75  | 1752.97  | 3817.18  | 113      |
| H2A_4  | 2827.23  | 6053.95  | 5786.9   | 75       |
| H2B_4  | 3132.05  | 6563.08  | 6199.14  | 75       |
| H4_4   | 1560.5   | 7217.96  | 6159.41  | 69       |
| H8_4   | 2649.78  | 5735.58  | 6586.17  | 61       |
| H9A_4  | 795.79   | 7168.6   | 6514.25  | 92       |
| H9B_4  | 700.29   | 6528.62  | 6908.56  | 92       |
| H9C_4  | 615.29   | 6343.84  | 6332.95  | 92       |
| H10A_4 | 2263.68  | 5049.96  | 7555.95  | 92       |
| H10B_4 | 2519.61  | 4697.74  | 7105.22  | 92       |
| H10C_4 | 1968.3   | 4462.77  | 7190.87  | 92       |
| H13A_4 | 278.9    | 5475.32  | 8110.93  | 114      |
| H13B_4 | 30.38    | 4694.78  | 7920.43  | 114      |
| H13C_4 | -142     | 5474.88  | 7659.47  | 114      |
| H2A_5  | 2616.81  | 7442.26  | 6253.43  | 101      |
| H2B_5  | 2358.62  | 6906.72  | 5825.67  | 101      |
| H4_5   | 1813.49  | 6813.95  | 6294.56  | 74       |
| H8_5   | 2707.55  | 5226.98  | 6974.42  | 76       |
| H9A_5  | 872.25   | 6721.07  | 6885.33  | 92       |
| H9B_5  | 711.13   | 6026.28  | 6529.15  | 92       |
| H9C_5  | 956.08   | 6762.95  | 6314.4   | 92       |
| H10A_5 | 1930.99  | 4572.63  | 7775.52  | 98       |
| H10B_5 | 2433.21  | 4380.15  | 7545.21  | 98       |
| H10C_5 | 1926.21  | 4012.82  | 7314.41  | 98       |
| H13A_5 | 168.7    | 5099.8   | 8146.44  | 115      |
| H13B_5 | -183.99  | 4566.89  | 7792.99  | 115      |
| H13C_5 | -194.32  | 5464.96  | 7714.16  | 115      |
| H2A_6  | 3081.29  | 5845.37  | 5597.34  | 69       |
| H2B_6  | 2850.57  | 6399.53  | 5169.67  | 69       |
| H4_6   | 2999.08  | 5337.21  | 4793.59  | 60       |
| H8_6   | 4412.1   | 6062.5   | 4928.08  | 63       |
| H9A_6  | 3121.32  | 3701.44  | 4277.73  | 88       |
| H9B_6  | 3042.94  | 4212.66  | 3792.63  | 88       |
| H9C_6  | 2726.56  | 4374.12  | 4244.42  | 88       |

**Table S16. Hydrogen Atom Coordinates ( $\text{\AA}\times 10^4$ ) and Isotropic Displacement Parameters ( $\text{\AA}^2\times 10^3$ ) for 4b<sub>2</sub>.**

| Atom   | <i>x</i> | <i>y</i> | <i>z</i> | U(eq) |
|--------|----------|----------|----------|-------|
| H10A_6 | 4928.39  | 4566.17  | 4418.13  | 92    |
| H10B_6 | 5029.22  | 5440.53  | 4545     | 92    |
| H10C_6 | 4841.75  | 5192.18  | 3994.86  | 92    |
| H13A_6 | 4305.1   | 1974.35  | 3600.27  | 105   |
| H13B_6 | 3854.68  | 2041.83  | 3180.71  | 105   |
| H13C_6 | 3751.07  | 1957.67  | 3744.58  | 105   |

**Table S17. Atomic Occupancy for 4b<sub>2</sub>.**

| Atom   | Occupancy | Atom   | Occupancy | Atom   | Occupancy |
|--------|-----------|--------|-----------|--------|-----------|
| C22    | 0.5       | H22A   | 0.5       | H22B   | 0.5       |
| C6     | 0.5       | H6A    | 0.5       | H6B    | 0.5       |
| O1_3   | 0.5       | O2_3   | 0.5       | O3_3   | 0.5       |
| N1_3   | 0.5       | N2_3   | 0.5       | N3_3   | 0.5       |
| C2_3   | 0.5       | H2A_3  | 0.5       | H2B_3  | 0.5       |
| C3_3   | 0.5       | C4_3   | 0.5       | H4_3   | 0.5       |
| C5_3   | 0.5       | C6_3   | 0.5       | C7_3   | 0.5       |
| C8_3   | 0.5       | H8_3   | 0.5       | C9_3   | 0.5       |
| H9A_3  | 0.5       | H9B_3  | 0.5       | H9C_3  | 0.5       |
| C10_3  | 0.5       | H10A_3 | 0.5       | H10B_3 | 0.5       |
| H10C_3 | 0.5       | C11_3  | 0.5       | C12_3  | 0.5       |
| C13_3  | 0.5       | H13A_3 | 0.5       | H13B_3 | 0.5       |
| H13C_3 | 0.5       | O1_4   | 0.5       | O2_4   | 0.5       |
| O3_4   | 0.5       | N1_4   | 0.5       | N2_4   | 0.5       |
| N3_4   | 0.5       | C2_4   | 0.5       | H2A_4  | 0.5       |
| H2B_4  | 0.5       | C3_4   | 0.5       | C4_4   | 0.5       |
| H4_4   | 0.5       | C5_4   | 0.5       | C6_4   | 0.5       |
| C7_4   | 0.5       | C8_4   | 0.5       | H8_4   | 0.5       |
| C9_4   | 0.5       | H9A_4  | 0.5       | H9B_4  | 0.5       |
| H9C_4  | 0.5       | C10_4  | 0.5       | H10A_4 | 0.5       |
| H10B_4 | 0.5       | H10C_4 | 0.5       | C11_4  | 0.5       |
| C12_4  | 0.5       | C13_4  | 0.5       | H13A_4 | 0.5       |
| H13B_4 | 0.5       | H13C_4 | 0.5       | O1_5   | 0.5       |
| O2_5   | 0.5       | O3_5   | 0.5       | N1_5   | 0.5       |
| N2_5   | 0.5       | N3_5   | 0.5       | C2_5   | 0.5       |
| H2A_5  | 0.5       | H2B_5  | 0.5       | C3_5   | 0.5       |
| C4_5   | 0.5       | H4_5   | 0.5       | C5_5   | 0.5       |
| C6_5   | 0.5       | C7_5   | 0.5       | C8_5   | 0.5       |

**Table S17. Atomic Occupancy for 4b<sub>2</sub>.**

| Atom   | Occupancy | Atom   | Occupancy | Atom   | Occupancy |
|--------|-----------|--------|-----------|--------|-----------|
| H8_5   | 0.5       | C9_5   | 0.5       | H9A_5  | 0.5       |
| H9B_5  | 0.5       | H9C_5  | 0.5       | C10_5  | 0.5       |
| H10A_5 | 0.5       | H10B_5 | 0.5       | H10C_5 | 0.5       |
| C11_5  | 0.5       | C12_5  | 0.5       | C13_5  | 0.5       |
| H13A_5 | 0.5       | H13B_5 | 0.5       | H13C_5 | 0.5       |
| O1_6   | 0.5       | O2_6   | 0.5       | O3_6   | 0.5       |
| N1_6   | 0.5       | N2_6   | 0.5       | N3_6   | 0.5       |
| C2_6   | 0.5       | H2A_6  | 0.5       | H2B_6  | 0.5       |
| C3_6   | 0.5       | C4_6   | 0.5       | H4_6   | 0.5       |
| C5_6   | 0.5       | C6_6   | 0.5       | C7_6   | 0.5       |
| C8_6   | 0.5       | H8_6   | 0.5       | C9_6   | 0.5       |
| H9A_6  | 0.5       | H9B_6  | 0.5       | H9C_6  | 0.5       |
| C10_6  | 0.5       | H10A_6 | 0.5       | H10B_6 | 0.5       |
| H10C_6 | 0.5       | C11_6  | 0.5       | C12_6  | 0.5       |
| C13_6  | 0.5       | H13A_6 | 0.5       | H13B_6 | 0.5       |
| H13C_6 | 0.5       |        |           |        |           |

**Table S18. Solvent masks information for 4b<sub>2</sub>.**

| Number | X      | Y      | Z      | Volume | Electron count | Content               |
|--------|--------|--------|--------|--------|----------------|-----------------------|
| 1      | -0.587 | -0.515 | -0.150 | 3899.3 | 1227.432       | C1,64 H1,16 Cl3,16 O1 |
| 2      | 0.250  | 0.111  | 0.000  | 9.0    | 0.0?           |                       |
| 3      | 0.250  | 0.389  | 0.500  | 9.0    | 0.0?           |                       |
| 4      | 0.750  | 0.611  | 0.500  | 9.0    | 0.0?           |                       |
| 5      | 0.750  | 0.889  | 0.000  | 9.0    | 0.0?           |                       |

**Experimental**

Single crystals were recrystallized from a solution of Compound **4b<sub>2</sub>** (GB-2021-01) dissolved in a mixture of dichloromethane and methanol. A suitable crystal with dimensions  $0.37 \times 0.30 \times 0.21$  mm<sup>3</sup> was selected and mounted on a loop with paratone oil on a XtaLAB Synergy, Dualflex, HyPix diffractometer. The crystal was kept at 109 K during data collection. Using *Olex2* [1], the structure was solved with the *olex2.solve* [2] structure solution program and refined with *SHELXL* [3] via full matrix least squares minimization on  $F^2$ .

**Crystal structure determination of 4b<sub>2</sub>**

**Crystal Data** for C<sub>53</sub>H<sub>59</sub>Cl<sub>9</sub>N<sub>12</sub>O<sub>12</sub> ( $M = 1375.17$  g/mol): monoclinic, space group *I2/a* (no. 15),  $a = 27.2958(4)$  Å,  $b = 17.6590(5)$  Å,  $c = 27.3191(6)$  Å,  $\beta = 95.6702(16)^\circ$ ,  $V = 13103.8(5)$  Å<sup>3</sup>,  $Z = 8$ ,  $T = 109(2)$  K,  $\mu(\text{Cu K}\alpha) = 4.071$  mm<sup>-1</sup>,  $D_{\text{calc}} = 1.394$  g/cm<sup>3</sup>, 76750 reflections measured ( $6.502^\circ \leq 2\theta \leq 130.176^\circ$ ), 11103 unique ( $R_{\text{int}} = 0.0541$ ,  $R_{\text{sigma}} = 0.0334$ ) which were used in all calculations. The final  $R_1$  was 0.0707 ( $I > 2\sigma(I)$ ) and  $wR_2$  was 0.2169 (all data).

**Refinement model description**

Number of restraints - 1592, number of constraints - unknown.  
Details:

1. Restrained distances  
 C21-C2\_1 ≈ C21-C2\_2  
 with sigma of 0.002  
 C22-C2\_3 ≈ C22-C2\_4  
 with sigma of 0.002

2. Uiso/Uanis restraints and constraints  
 Uanis(O3\_4) = Uanis(O3\_5)  
 Uanis(N1\_4) = Uanis(N1\_5)  
 Uanis(N2\_4) = Uanis(N2\_5)  
 Uanis(C12\_4) = Uanis(C12\_5)  
 Uanis(O3\_3) = Uanis(O3\_6)  
 Uanis(N1\_3) = Uanis(N1\_6)  
 Uanis(N3\_6) = Uanis(N3\_3)  
 Uanis(C13\_6) = Uanis(C11\_3)

3. Rigid body (RIGU) restrains  
 with sigma for 1-2 distances of 0.002 and sigma for 1-3 distances of 0.004

4. Same fragment restrains

5. Others  
 Fixed Sof: C22(0.5) H22A(0.5) H22B(0.5) C6(0.5) H6A(0.5) H6B(0.5) O1(0.5)  
 O2(0.5) O3(0.5) N1(0.5) N2(0.5) N3(0.5) C2(0.5) H2A(0.5) H2B(0.5) C3(0.5)  
 C4(0.5) H4(0.5) C5(0.5) C6(0.5) C7(0.5) C8(0.5) H8(0.5) C9(0.5) H9A(0.5)  
 H9B(0.5) H9C(0.5) C10(0.5) H10A(0.5) H10B(0.5) H10C(0.5) C11(0.5) C12(0.5)  
 C13(0.5) H13A(0.5) H13B(0.5) H13C(0.5) O1(0.5) O2(0.5) O3(0.5) N1(0.5) N2(0.5)  
 N3(0.5) C2(0.5) H2A(0.5) H2B(0.5) C3(0.5) C4(0.5) H4(0.5) C5(0.5) C6(0.5)  
 C7(0.5) C8(0.5) H8(0.5) C9(0.5) H9A(0.5) H9B(0.5) H9C(0.5) C10(0.5) H10A(0.5)  
 H10B(0.5) H10C(0.5) C11(0.5) C12(0.5) C13(0.5) H13A(0.5) H13B(0.5) H13C(0.5)  
 O1(0.5) O2(0.5) O3(0.5) N1(0.5) N2(0.5) N3(0.5) C2(0.5) H2A(0.5) H2B(0.5)  
 C3(0.5) C4(0.5) H4(0.5) C5(0.5) C6(0.5) C7(0.5) C8(0.5) H8(0.5) C9(0.5)  
 H9A(0.5) H9B(0.5) H9C(0.5) C10(0.5) H10A(0.5) H10B(0.5) H10C(0.5) C11(0.5)  
 C12(0.5) C13(0.5) H13A(0.5) H13B(0.5) H13C(0.5) O1(0.5) O2(0.5) O3(0.5)  
 N1(0.5) N2(0.5) N3(0.5) C2(0.5) H2A(0.5) H2B(0.5) C3(0.5) C4(0.5) H4(0.5)  
 C5(0.5) C6(0.5) C7(0.5) C8(0.5) H8(0.5) C9(0.5) H9A(0.5) H9B(0.5) H9C(0.5)  
 C10(0.5) H10A(0.5) H10B(0.5) H10C(0.5) C11(0.5) C12(0.5) C13(0.5) H13A(0.5)  
 H13B(0.5) H13C(0.5)

6.a Secondary CH2 refined with riding coordinates:  
 C21(H21A,H21B), C22(H22A,H22B), C6(H6A,H6B), C2(H2A,H2B), C2(H2A,H2B), C2(H2A,  
 H2B), C2(H2A,H2B), C2(H2A,H2B), C2(H2A,H2B)

6.b Aromatic/amide H refined with riding coordinates:  
 C4(H4), C8(H8), C4(H4), C8(H8), C4(H4), C8(H8), C4(H4), C8(H8), C4(H4),  
 C8(H8), C4(H4), C8(H8)

6.c Idealised Me refined as rotating group:  
 C9(H9A,H9B,H9C), C10(H10A,H10B,H10C), C13(H13A,H13B,H13C), C9(H9A,H9B,H9C),  
 C10(H10A,H10B,H10C), C13(H13A,H13B,H13C), C9(H9A,H9B,H9C), C10(H10A,H10B,H10C),  
 C13(H13A,H13B,H13C), C9(H9A,H9B,H9C), C10(H10A,H10B,H10C), C13(H13A,H13B,  
 H13C), C9(H9A,H9B,H9C), C10(H10A,H10B,H10C), C13(H13A,H13B,H13C), C9(H9A,H9B,  
 H9C), C10(H10A,H10B,H10C), C13(H13A,H13B,H13C)

This report has been created with Olex2, compiled on 2023.02.24 svn.rfl66f9f3 for OlexSys. Please [let us know](#) if there are any errors or if you would like to have additional features.

# Crystal Structure Data for Dimer 4c<sub>2</sub>

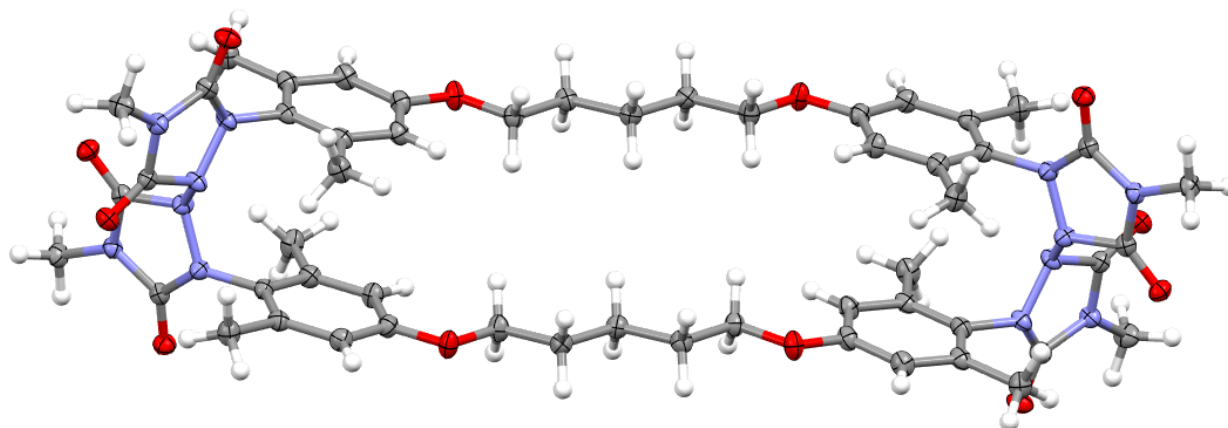

\*ellipsoids represent 50% probability level

**Table S19. Crystal data and structure refinement for 4c<sub>2</sub>.**

|                                    |                                                                 |
|------------------------------------|-----------------------------------------------------------------|
| Identification code                | GB-dimer-4-21-22                                                |
| Empirical formula                  | C <sub>63</sub> H <sub>82</sub> N <sub>12</sub> O <sub>21</sub> |
| Formula weight                     | 1343.40                                                         |
| Temperature/K                      | 100.0(9)                                                        |
| Crystal system                     | monoclinic                                                      |
| Space group                        | P2 <sub>1</sub> /c                                              |
| a/Å                                | 8.92534(8)                                                      |
| b/Å                                | 14.21670(12)                                                    |
| c/Å                                | 51.8332(4)                                                      |
| α/°                                | 90                                                              |
| β/°                                | 90.4433(8)                                                      |
| γ/°                                | 90                                                              |
| Volume/Å <sup>3</sup>              | 6576.87(9)                                                      |
| Z                                  | 4                                                               |
| ρ <sub>calc</sub> /cm <sup>3</sup> | 1.357                                                           |
| μ/mm <sup>-1</sup>                 | 0.862                                                           |
| F(000)                             | 2848.0                                                          |
| Crystal size/mm <sup>3</sup>       | 0.27 × 0.21 × 0.1                                               |
| Radiation                          | Cu Kα (λ = 1.54184)                                             |
| 2θ range for data collection/°     | 6.446 to 146.38                                                 |
| Index ranges                       | -9 ≤ h ≤ 11, -17 ≤ k ≤ 15, -56 ≤ l ≤ 63                         |
| Reflections collected              | 58388                                                           |
| Independent reflections            | 12479 [R <sub>int</sub> = 0.0609, R <sub>sigma</sub> = 0.0455]  |
| Data/restraints/parameters         | 12479/30/899                                                    |
| Goodness-of-fit on F <sup>2</sup>  | 1.020                                                           |

Final R indexes [ $I \geq 2\sigma(I)$ ]  $R_1 = 0.0448$ ,  $wR_2 = 0.1092$   
 Final R indexes [all data]  $R_1 = 0.0554$ ,  $wR_2 = 0.1150$   
 Largest diff. peak/hole /  $e \text{ \AA}^{-3}$  0.24/-0.25

**Table S20. Fractional Atomic Coordinates ( $\times 10^4$ ) and Equivalent Isotropic Displacement Parameters ( $\text{\AA}^2 \times 10^3$ ) for  $4c_2$ .  $U_{eq}$  is defined as 1/3 of the trace of the orthogonalised  $U_{ij}$  tensor.**

| Atom  | x            | y           | z          | U(eq)    |
|-------|--------------|-------------|------------|----------|
| O1_4  | 3195.7 (15)  | 4338.6 (9)  | 5645.5 (2) | 26.8 (3) |
| O2_4  | 2987.4 (14)  | 4699.7 (9)  | 4238.9 (2) | 26.5 (3) |
| O3_4  | -16.8 (13)   | 5719.7 (8)  | 7175.3 (2) | 23.5 (3) |
| O4_4  | 3998.7 (13)  | 6763.8 (8)  | 6709.9 (2) | 25.5 (3) |
| O5_4  | 2260.2 (13)  | 7240.7 (8)  | 3208.0 (2) | 23.5 (3) |
| O6_4  | -2094.9 (13) | 6082.6 (8)  | 2855.2 (2) | 23.0 (3) |
| N1_4  | 2368.7 (16)  | 5511.2 (10) | 6657.7 (3) | 19.8 (3) |
| N2_4  | 967.4 (16)   | 5284.5 (9)  | 6777.8 (3) | 19.1 (3) |
| N3_4  | 2058.6 (16)  | 6442.6 (10) | 6994.4 (3) | 20.2 (3) |
| N4_4  | 831.4 (15)   | 5915.8 (10) | 3289.6 (3) | 19.2 (3) |
| N5_4  | -672.4 (15)  | 5672.6 (9)  | 3217.1 (3) | 18.9 (3) |
| N6_4  | 29.7 (15)    | 6902.5 (10) | 2989.3 (3) | 19.2 (3) |
| C1_4  | 2548 (2)     | 4840.0 (12) | 5433.2 (3) | 22.3 (4) |
| C2_4  | 3067 (2)     | 4386.8 (12) | 5185.7 (3) | 22.4 (4) |
| C3_4  | 2544 (2)     | 4950.3 (12) | 4952.9 (3) | 23.1 (4) |
| C4_4  | 3041 (2)     | 4531.5 (12) | 4696.3 (3) | 22.7 (4) |
| C5_4  | 2504 (2)     | 5129.8 (13) | 4473.3 (3) | 25.5 (4) |
| C6_4  | 904.2 (19)   | 5811.0 (11) | 7009.1 (3) | 19.1 (3) |
| C7_4  | 2934.8 (19)  | 6293.0 (12) | 6776.5 (3) | 20.3 (3) |
| C8_4  | 2319 (2)     | 7182.6 (13) | 7184.5 (3) | 27.4 (4) |
| C9_4  | 2581.0 (19)  | 5251.3 (12) | 6392.6 (3) | 20.3 (3) |
| C10_4 | 3518 (2)     | 4483.4 (12) | 6342.3 (3) | 21.9 (4) |
| C11_4 | 3695 (2)     | 4215.6 (12) | 6086.9 (3) | 24.5 (4) |
| C12_4 | 2029 (2)     | 5449.2 (12) | 5942.9 (3) | 23.2 (4) |
| C13_4 | 1845.7 (19)  | 5746.2 (12) | 6197.3 (3) | 22.0 (4) |
| C14_4 | 4306 (2)     | 3955.1 (13) | 6555.0 (3) | 25.6 (4) |
| C15_4 | -1038.1 (19) | 6215.0 (12) | 2996.8 (3) | 19.4 (3) |
| C16_4 | 1180.8 (18)  | 6745.5 (11) | 3167.5 (3) | 18.6 (3) |
| C17_4 | -5 (2)       | 7681.5 (12) | 2806.4 (3) | 23.6 (4) |
| C18_4 | 1379.1 (19)  | 5640.1 (12) | 3537.8 (3) | 19.6 (3) |
| C19_4 | 960.0 (19)   | 6140.9 (12) | 3757.2 (3) | 22.2 (4) |

**Table S20. Fractional Atomic Coordinates ( $\times 10^4$ ) and Equivalent Isotropic Displacement Parameters ( $\text{\AA}^2 \times 10^3$ ) for  $4c_2$ .  $U_{eq}$  is defined as 1/3 of the trace of the orthogonalised  $U_{ij}$  tensor.**

| Atom  | <i>x</i>    | <i>y</i>    | <i>z</i>    | U(eq)    |
|-------|-------------|-------------|-------------|----------|
| C20_4 | 1504 (2)    | 5844.7 (12) | 3997.3 (3)  | 23.4 (4) |
| C21_4 | 2442 (2)    | 5065.3 (12) | 4013.1 (3)  | 22.4 (4) |
| C22_4 | 2878 (2)    | 4592.8 (12) | 3790.5 (3)  | 22.6 (4) |
| C23_4 | 2337.3 (19) | 4862.8 (12) | 3551.0 (3)  | 20.9 (4) |
| C24_4 | -42 (2)     | 6991.4 (13) | 3736.9 (3)  | 27.7 (4) |
| C25_4 | 2747 (2)    | 4316.6 (13) | 3312.5 (3)  | 26.1 (4) |
| C26_4 | 887 (2)     | 6591.4 (13) | 6256.7 (3)  | 26.9 (4) |
| C27_4 | 2951 (2)    | 4682.8 (12) | 5888.9 (3)  | 23.0 (4) |
| O1_5  | 8947.5 (14) | 4777.1 (9)  | 681.7 (2)   | 24.7 (3) |
| O2_5  | 7209.1 (15) | 4356.0 (8)  | -692.3 (2)  | 26.1 (3) |
| O3_5  | 5001.1 (13) | 6040.9 (8)  | 2145.5 (2)  | 22.8 (3) |
| O4_5  | 9340.4 (13) | 7122.2 (8)  | 1782.1 (2)  | 23.7 (3) |
| O5_5  | 7040.4 (13) | 6823.0 (8)  | -1739.7 (2) | 23.3 (3) |
| O6_5  | 2851.1 (13) | 5723.4 (8)  | -2158.5 (2) | 22.3 (3) |
| N1_5  | 7783.6 (15) | 5857.4 (10) | 1689.6 (3)  | 18.9 (3) |
| N2_5  | 6292.0 (15) | 5630.4 (9)  | 1773.1 (3)  | 18.3 (3) |
| N3_5  | 7183.9 (16) | 6788.1 (10) | 2014.4 (3)  | 20.3 (3) |
| N4_5  | 5456.6 (15) | 5558.5 (10) | -1668.4 (3) | 18.9 (3) |
| N5_5  | 4001.9 (15) | 5328.9 (9)  | -1768.9 (3) | 18.3 (3) |
| N6_5  | 4936.8 (15) | 6511.0 (9)  | -1993.7 (3) | 18.7 (3) |
| C1_5  | 8119 (2)    | 5186.9 (13) | 473.1 (3)   | 22.8 (4) |
| C2_5  | 8324 (2)    | 4578.6 (12) | 237.0 (3)   | 21.6 (4) |
| C3_5  | 7486.8 (19) | 4994.1 (12) | 5.8 (3)     | 21.8 (4) |
| C4_5  | 7692 (2)    | 4430.5 (12) | -241.7 (3)  | 21.9 (4) |
| C5_5  | 6859 (2)    | 4875.0 (12) | -464.0 (3)  | 23.6 (4) |
| C6_5  | 6040.3 (19) | 6147.4 (12) | 2001.7 (3)  | 19.4 (3) |
| C7_5  | 8237.8 (19) | 6647.9 (11) | 1821.9 (3)  | 18.8 (3) |
| C8_5  | 7287 (2)    | 7513.9 (13) | 2213.3 (3)  | 27.5 (4) |
| C9_5  | 8151.6 (19) | 5645.9 (11) | 1426.9 (3)  | 18.8 (3) |
| C10_5 | 9087.2 (19) | 4875.6 (12) | 1380.6 (3)  | 20.1 (3) |
| C11_5 | 9357.0 (19) | 4635.6 (12) | 1125.7 (3)  | 21.0 (4) |
| C12_5 | 7803 (2)    | 5910.3 (12) | 974.1 (3)   | 21.9 (4) |
| C13_5 | 7527.4 (19) | 6177.3 (12) | 1227.6 (3)  | 20.7 (3) |
| C14_5 | 9750 (2)    | 4303.4 (12) | 1596.9 (3)  | 24.0 (4) |
| C15_5 | 3821.0 (19) | 5854.4 (12) | -1999.2 (3) | 18.8 (3) |
| C16_5 | 5945.2 (19) | 6351.4 (11) | -1792.9 (3) | 19.2 (3) |
| C17_5 | 5065 (2)    | 7267.1 (12) | -2182.2 (3) | 23.2 (4) |
| C18_5 | 5870.1 (19) | 5276.6 (12) | -1412.6 (3) | 19.8 (3) |



**Table S20. Fractional Atomic Coordinates ( $\times 10^4$ ) and Equivalent Isotropic Displacement Parameters ( $\text{\AA}^2 \times 10^3$ ) for  $4c_2$ .  $U_{eq}$  is defined as 1/3 of the trace of the orthogonalised  $U_{ij}$  tensor.**

| Atom  | <i>x</i>     | <i>y</i>    | <i>z</i>    | $U(eq)$   |
|-------|--------------|-------------|-------------|-----------|
| C19_5 | 5321.7 (19)  | 5766.2 (12) | -1199.1 (3) | 21.3 (4)  |
| C20_5 | 5757 (2)     | 5468.0 (12) | -953.3 (3)  | 22.1 (4)  |
| C21_5 | 6716 (2)     | 4703.5 (12) | -924.6 (3)  | 22.2 (4)  |
| C22_5 | 7247 (2)     | 4229.8 (12) | -1140.0 (3) | 23.0 (4)  |
| C23_5 | 6828.1 (19)  | 4503.5 (12) | -1387.2 (3) | 20.8 (4)  |
| C24_5 | 4303 (2)     | 6600.3 (13) | -1231.8 (3) | 26.3 (4)  |
| C25_5 | 7402 (2)     | 3969.6 (13) | -1616.7 (3) | 25.3 (4)  |
| C26_5 | 6571 (2)     | 7023.5 (13) | 1285.0 (3)  | 27.1 (4)  |
| C27_5 | 8689.1 (19)  | 5124.5 (12) | 923.9 (3)   | 21.0 (4)  |
| O1S_1 | 600.6 (17)   | 6816.1 (11) | 4737.7 (3)  | 46.0 (4)  |
| O2S_1 | -1136.9 (15) | 7928.4 (9)  | 4658.3 (3)  | 32.7 (3)  |
| O3S_1 | -492.5 (15)  | 7660.9 (10) | 5051.6 (3)  | 34.7 (3)  |
| C1S_1 | -253 (2)     | 7409.7 (13) | 4808.5 (4)  | 30.0 (4)  |
| C2S_1 | -986 (2)     | 7741.6 (15) | 4385.4 (4)  | 37.1 (5)  |
| C3S_1 | 357 (2)      | 7142.3 (15) | 5241.8 (4)  | 39.9 (5)  |
| O1S_2 | 4112.2 (16)  | 1863.5 (10) | 4710.7 (3)  | 43.6 (4)  |
| O2S_2 | 5824.1 (15)  | 2909.7 (9)  | 4570.8 (3)  | 34.7 (3)  |
| O3S_2 | 5651.6 (15)  | 2671.9 (10) | 4978.4 (3)  | 35.7 (3)  |
| C1S_2 | 5089 (2)     | 2424.6 (13) | 4750.2 (4)  | 31.2 (4)  |
| C2S_2 | 5307 (2)     | 2750.0 (15) | 4309.3 (4)  | 39.1 (5)  |
| C3S_2 | 5026 (3)     | 2178.4 (15) | 5196.4 (4)  | 42.2 (5)  |
| O1S_3 | 2673 (3)     | 4410.8 (18) | 2393.2 (5)  | 27.7 (4)  |
| O2S_3 | 3481 (3)     | 5514.3 (18) | 2675.8 (5)  | 25.0 (3)  |
| O3S_3 | 1381 (3)     | 5746.4 (18) | 2481.1 (5)  | 25.0 (3)  |
| C1S_3 | 2550 (50)    | 5160 (30)   | 2498 (12)   | 22.3 (13) |
| C2S_3 | 4864 (17)    | 5005 (13)   | 2711 (4)    | 29.2 (14) |
| C3S_3 | 177 (19)     | 5413 (14)   | 2318 (4)    | 28.0 (15) |
| O1_3  | 2481 (3)     | 5997.5 (16) | 2604.3 (4)  | 27.7 (4)  |
| O2_3  | 3802 (3)     | 4661.3 (16) | 2537.2 (4)  | 25.0 (3)  |
| O3_3  | 1702 (3)     | 4831.4 (16) | 2337.8 (4)  | 25.0 (3)  |
| C1_3  | 2630 (40)    | 5230 (30)   | 2509 (10)   | 22.3 (13) |
| C2_3  | 5023 (15)    | 5042 (11)   | 2685 (3)    | 29.2 (14) |
| C3_3  | 328 (16)     | 5345 (12)   | 2293 (3)    | 28.0 (15) |

**Table S21. Anisotropic Displacement Parameters ( $\text{\AA}^2 \times 10^3$ ) for 4c<sub>2</sub>. The Anisotropic displacement factor exponent takes the form:  $-2\pi^2[h^2a^{*2}U_{11}+2hka^*b^*U_{12}+\dots]$ .**

| Atom  | U <sub>11</sub> | U <sub>22</sub> | U <sub>33</sub> | U <sub>23</sub> | U <sub>13</sub> | U <sub>12</sub> |
|-------|-----------------|-----------------|-----------------|-----------------|-----------------|-----------------|
| O1_4  | 39.7 (8)        | 22.6 (6)        | 18.1 (6)        | -0.2 (5)        | 2.4 (5)         | 4.8 (6)         |
| O2_4  | 34.5 (7)        | 26.6 (7)        | 18.3 (6)        | 0.2 (5)         | -1.8 (5)        | 9.7 (6)         |
| O3_4  | 24.7 (6)        | 21.9 (6)        | 24.1 (6)        | 0.3 (5)         | 5.0 (5)         | 0.1 (5)         |
| O4_4  | 23.7 (6)        | 19.2 (6)        | 33.7 (7)        | -1.2 (5)        | 5.4 (5)         | -3.0 (5)        |
| O5_4  | 23.1 (6)        | 21.4 (6)        | 26.0 (6)        | 1.9 (5)         | -1.7 (5)        | -4.6 (5)        |
| O6_4  | 22.8 (6)        | 21.0 (6)        | 24.9 (6)        | -0.6 (5)        | -3.7 (5)        | -1.1 (5)        |
| N1_4  | 21.7 (7)        | 16.9 (7)        | 21.0 (7)        | -0.7 (6)        | 5.3 (6)         | -2.8 (6)        |
| N2_4  | 21.8 (7)        | 14.1 (7)        | 21.5 (7)        | -0.1 (5)        | 4.2 (6)         | -3.1 (6)        |
| N3_4  | 22.5 (7)        | 17.3 (7)        | 20.7 (7)        | -3.1 (6)        | 2.0 (5)         | -2.0 (6)        |
| N4_4  | 20.0 (7)        | 16.7 (7)        | 20.9 (7)        | 2.1 (6)         | -2.2 (5)        | -2.0 (6)        |
| N5_4  | 20.8 (7)        | 12.9 (7)        | 23.0 (7)        | 1.6 (5)         | -1.8 (6)        | -2.0 (6)        |
| N6_4  | 21.7 (7)        | 16.3 (7)        | 19.5 (7)        | 1.7 (5)         | 0.1 (5)         | -1.1 (6)        |
| C1_4  | 27.0 (9)        | 19.0 (9)        | 21.1 (8)        | 1.5 (7)         | 0.1 (7)         | 0.3 (7)         |
| C2_4  | 25.8 (9)        | 19.0 (8)        | 22.3 (9)        | -0.6 (7)        | 1.3 (7)         | -1.2 (7)        |
| C3_4  | 25.2 (9)        | 21.5 (9)        | 22.6 (8)        | -0.6 (7)        | -0.1 (7)        | 1.3 (7)         |
| C4_4  | 23.2 (9)        | 22.3 (9)        | 22.6 (9)        | -0.3 (7)        | -1.3 (7)        | 0.3 (7)         |
| C5_4  | 31.9 (10)       | 23.5 (9)        | 21.2 (9)        | -2.0 (7)        | 1.5 (7)         | 6.0 (8)         |
| C6_4  | 21.9 (9)        | 15.5 (8)        | 19.8 (8)        | 0.6 (6)         | -1.6 (7)        | 0.7 (7)         |
| C7_4  | 21.3 (9)        | 15.8 (8)        | 23.7 (8)        | 1.1 (7)         | 1.5 (7)         | 2.3 (7)         |
| C8_4  | 29.2 (10)       | 23.6 (9)        | 29.5 (9)        | -9.2 (8)        | 1.8 (7)         | -3.4 (8)        |
| C9_4  | 23.6 (9)        | 16.4 (8)        | 21.0 (8)        | -1.1 (7)        | 3.7 (7)         | -3.2 (7)        |
| C10_4 | 25.7 (9)        | 17.5 (8)        | 22.6 (8)        | 0.9 (7)         | 3.2 (7)         | -3.2 (7)        |
| C11_4 | 29.7 (10)       | 18.2 (9)        | 25.6 (9)        | -0.1 (7)        | 3.8 (7)         | 2.4 (7)         |
| C12_4 | 27.4 (9)        | 20.0 (9)        | 22.2 (8)        | 4.5 (7)         | 2.2 (7)         | 0.5 (7)         |
| C13_4 | 23.7 (9)        | 17.1 (8)        | 25.1 (9)        | 0.9 (7)         | 4.3 (7)         | -2.7 (7)        |
| C14_4 | 32.8 (10)       | 20.9 (9)        | 23.2 (9)        | -0.4 (7)        | 1.6 (7)         | 4.6 (8)         |
| C15_4 | 23.0 (9)        | 16.1 (8)        | 19.3 (8)        | -1.5 (6)        | 2.0 (7)         | 2.4 (7)         |
| C16_4 | 21.8 (9)        | 15.6 (8)        | 18.2 (8)        | -1.2 (6)        | 1.6 (6)         | 0.5 (7)         |
| C17_4 | 28.9 (10)       | 17.6 (9)        | 24.2 (9)        | 6.3 (7)         | -1.9 (7)        | -2.4 (7)        |
| C18_4 | 21.7 (9)        | 17.7 (8)        | 19.4 (8)        | 1.4 (6)         | -1.8 (6)        | -2.2 (7)        |
| C19_4 | 24.6 (9)        | 17.8 (9)        | 24.3 (9)        | 0.5 (7)         | -0.9 (7)        | -0.1 (7)        |
| C20_4 | 28.3 (9)        | 20.4 (9)        | 21.6 (8)        | -2.6 (7)        | -0.5 (7)        | 2.6 (7)         |
| C21_4 | 24.5 (9)        | 20.1 (9)        | 22.6 (8)        | 2.1 (7)         | -1.4 (7)        | -0.1 (7)        |
| C22_4 | 24.2 (9)        | 18.0 (9)        | 25.5 (9)        | 0.7 (7)         | 0.2 (7)         | 2.7 (7)         |
| C23_4 | 21.5 (9)        | 18.0 (8)        | 23.1 (8)        | 0.4 (7)         | 0.5 (7)         | -1.3 (7)        |
| C24_4 | 37.0 (11)       | 22.0 (9)        | 24.2 (9)        | -1.7 (7)        | -3.4 (8)        | 7.1 (8)         |
| C25_4 | 31.3 (10)       | 23.5 (9)        | 23.4 (9)        | 0.5 (7)         | 1.7 (7)         | 5.7 (8)         |
| C26_4 | 33.1 (10)       | 21.0 (9)        | 26.7 (9)        | 1.8 (7)         | 4.7 (7)         | 5.3 (8)         |
| C27_4 | 28.8 (9)        | 19.6 (9)        | 20.5 (8)        | -1.7 (7)        | 3.4 (7)         | -2.0 (7)        |

**Table S21. Anisotropic Displacement Parameters ( $\text{\AA}^2 \times 10^3$ ) for 4c2. The Anisotropic displacement factor exponent takes the form:  $-2\pi^2[h^2a^{*2}U_{11}+2hka^*b^*U_{12}+\dots]$ .**

| Atom  | U <sub>11</sub> | U <sub>22</sub> | U <sub>33</sub> | U <sub>23</sub> | U <sub>13</sub> | U <sub>12</sub> |
|-------|-----------------|-----------------|-----------------|-----------------|-----------------|-----------------|
| O1_5  | 29.8 (7)        | 27.4 (7)        | 16.9 (6)        | -2.3 (5)        | -1.2 (5)        | 8.3 (5)         |
| O2_5  | 38.6 (7)        | 21.2 (6)        | 18.3 (6)        | -0.8 (5)        | -5.3 (5)        | 3.3 (5)         |
| O3_5  | 22.8 (6)        | 23.2 (6)        | 22.6 (6)        | 0.3 (5)         | 5.4 (5)         | -0.4 (5)        |
| O4_5  | 23.1 (6)        | 22.4 (6)        | 25.6 (6)        | -2.5 (5)        | 3.4 (5)         | -5.3 (5)        |
| O5_5  | 22.2 (6)        | 18.8 (6)        | 28.9 (6)        | 1.7 (5)         | -1.9 (5)        | -3.4 (5)        |
| O6_5  | 23.3 (6)        | 20.8 (6)        | 22.8 (6)        | 0.0 (5)         | -3.1 (5)        | 1.0 (5)         |
| N1_5  | 20.2 (7)        | 17.0 (7)        | 19.6 (7)        | -1.8 (5)        | 3.8 (5)         | -3.1 (6)        |
| N2_5  | 20.7 (7)        | 13.8 (7)        | 20.6 (7)        | -0.6 (5)        | 3.8 (5)         | -2.7 (5)        |
| N3_5  | 23.7 (7)        | 18.9 (7)        | 18.3 (7)        | -3.1 (6)        | 2.2 (5)         | -1.8 (6)        |
| N4_5  | 20.7 (7)        | 15.8 (7)        | 20.3 (7)        | 1.7 (5)         | -3.1 (5)        | -3.8 (6)        |
| N5_5  | 19.8 (7)        | 13.8 (7)        | 21.4 (7)        | 0.1 (5)         | -2.9 (5)        | -2.3 (5)        |
| N6_5  | 20.6 (7)        | 15.1 (7)        | 20.3 (7)        | 2.2 (5)         | -0.1 (5)        | 0.0 (6)         |
| C1_5  | 25.1 (9)        | 24.6 (9)        | 18.6 (8)        | 2.2 (7)         | 0.4 (7)         | 3.6 (7)         |
| C2_5  | 23.2 (9)        | 20.2 (9)        | 21.4 (8)        | -0.2 (7)        | 0.9 (7)         | -0.5 (7)        |
| C3_5  | 22.6 (9)        | 21.6 (9)        | 21.1 (8)        | -0.2 (7)        | -0.2 (7)        | -0.5 (7)        |
| C4_5  | 25.6 (9)        | 18.7 (9)        | 21.2 (8)        | 1.3 (7)         | -1.2 (7)        | -2.8 (7)        |
| C5_5  | 30.3 (10)       | 19.9 (9)        | 20.5 (8)        | -1.5 (7)        | -0.6 (7)        | -1.0 (7)        |
| C6_5  | 23.0 (9)        | 16.2 (8)        | 19.0 (8)        | 0.4 (6)         | -1.7 (7)        | 0.9 (7)         |
| C7_5  | 22.5 (9)        | 15.2 (8)        | 18.6 (8)        | -0.9 (6)        | -0.4 (6)        | 1.5 (7)         |
| C8_5  | 32.5 (10)       | 25.1 (10)       | 24.9 (9)        | -10.0 (8)       | 5.3 (7)         | -5.5 (8)        |
| C9_5  | 21.8 (8)        | 16.1 (8)        | 18.6 (8)        | -1.7 (6)        | 2.3 (6)         | -2.9 (7)        |
| C10_5 | 23.6 (9)        | 16.3 (8)        | 20.3 (8)        | -0.3 (6)        | -0.5 (6)        | -2.6 (7)        |
| C11_5 | 22.3 (9)        | 16.0 (8)        | 24.8 (9)        | -1.4 (7)        | 0.6 (7)         | 3.8 (7)         |
| C12_5 | 25.8 (9)        | 19.2 (9)        | 20.7 (8)        | 3.4 (7)         | -0.2 (7)        | 1.2 (7)         |
| C13_5 | 22.3 (9)        | 17.0 (8)        | 22.9 (8)        | -0.4 (7)        | 2.5 (7)         | -0.5 (7)        |
| C14_5 | 31.5 (10)       | 18.0 (9)        | 22.4 (8)        | -0.9 (7)        | -1.3 (7)        | 3.0 (7)         |
| C15_5 | 21.5 (9)        | 17.1 (8)        | 17.8 (8)        | -1.5 (6)        | 1.8 (7)         | 1.8 (7)         |
| C16_5 | 20.6 (9)        | 15.3 (8)        | 21.7 (8)        | -0.9 (6)        | 1.6 (6)         | 2.4 (7)         |
| C17_5 | 25.7 (9)        | 19.7 (9)        | 24.0 (9)        | 6.7 (7)         | 1.2 (7)         | -1.1 (7)        |
| C18_5 | 22.7 (9)        | 15.8 (8)        | 20.8 (8)        | 1.6 (6)         | -2.1 (6)        | -3.3 (7)        |
| C19_5 | 22.7 (9)        | 16.2 (8)        | 24.9 (9)        | -0.1 (7)        | -1.3 (7)        | -2.7 (7)        |
| C20_5 | 27.2 (9)        | 18.5 (9)        | 20.4 (8)        | -2.4 (7)        | -0.3 (7)        | -0.8 (7)        |
| C21_5 | 26.0 (9)        | 19.6 (9)        | 20.8 (8)        | 2.1 (7)         | -3.4 (7)        | -3.5 (7)        |
| C22_5 | 27.4 (9)        | 16.6 (8)        | 25.0 (9)        | 0.9 (7)         | -3.3 (7)        | 2.4 (7)         |
| C23_5 | 22.3 (9)        | 17.3 (8)        | 22.8 (8)        | -0.3 (7)        | -1.4 (7)        | -2.1 (7)        |
| C24_5 | 34.4 (10)       | 20.6 (9)        | 23.8 (9)        | -1.3 (7)        | -0.8 (7)        | 4.0 (8)         |
| C25_5 | 28.7 (10)       | 22.1 (9)        | 25.3 (9)        | -0.7 (7)        | -0.3 (7)        | 4.1 (7)         |
| C26_5 | 35.2 (10)       | 22.7 (9)        | 23.4 (9)        | 1.1 (7)         | 1.9 (7)         | 8.6 (8)         |
| C27_5 | 23.7 (9)        | 20.4 (9)        | 18.9 (8)        | -2.3 (7)        | 2.1 (7)         | -0.1 (7)        |

**Table S21. Anisotropic Displacement Parameters ( $\text{\AA}^2 \times 10^3$ ) for 4c<sub>2</sub>. The Anisotropic displacement factor exponent takes the form:  $-2\pi^2[h^2a^{*2}U_{11}+2hka^*b^*U_{12}+\dots]$ .**

| Atom  | U <sub>11</sub> | U <sub>22</sub> | U <sub>33</sub> | U <sub>23</sub> | U <sub>13</sub> | U <sub>12</sub> |
|-------|-----------------|-----------------|-----------------|-----------------|-----------------|-----------------|
| O1S_1 | 45.3 (9)        | 36.1 (9)        | 56.8 (9)        | -7.9 (7)        | 3.2 (7)         | 17.6 (7)        |
| O2S_1 | 33.0 (7)        | 26.2 (7)        | 39.0 (7)        | -2.9 (6)        | 5.1 (6)         | 5.1 (6)         |
| O3S_1 | 33.8 (8)        | 29.6 (7)        | 40.8 (8)        | -1.6 (6)        | 2.2 (6)         | 5.1 (6)         |
| C1S_1 | 25.5 (10)       | 21.3 (9)        | 43.3 (11)       | -2.9 (8)        | 3.8 (8)         | -2.5 (8)        |
| C2S_1 | 42.1 (12)       | 28.5 (11)       | 40.7 (11)       | -5.1 (9)        | 6.2 (9)         | -0.2 (9)        |
| C3S_1 | 40.0 (12)       | 31.4 (11)       | 48.1 (13)       | 4.3 (9)         | -4.4 (10)       | 0.3 (9)         |
| O1S_2 | 34.3 (8)        | 31.3 (8)        | 65.1 (10)       | -1.7 (7)        | 0.0 (7)         | -12.1 (7)       |
| O2S_2 | 27.8 (7)        | 25.5 (7)        | 50.7 (8)        | -1.0 (6)        | -2.0 (6)        | -4.8 (6)        |
| O3S_2 | 30.0 (7)        | 27.2 (7)        | 50.1 (9)        | -3.3 (6)        | 1.5 (6)         | -1.7 (6)        |
| C1S_2 | 22.6 (10)       | 20.2 (9)        | 50.7 (12)       | -3.6 (9)        | -1.0 (8)        | 3.1 (8)         |
| C2S_2 | 38.0 (12)       | 30.4 (11)       | 48.9 (12)       | -4.9 (9)        | -4.2 (9)        | 0.6 (9)         |
| C3S_2 | 43.1 (13)       | 30.7 (11)       | 53.0 (13)       | 3.4 (10)        | 7.8 (10)        | 6.9 (10)        |
| O1S_3 | 32.6 (10)       | 20.1 (9)        | 30.5 (9)        | -6.7 (8)        | 0.7 (8)         | -2.6 (8)        |
| O2S_3 | 28.2 (7)        | 20.5 (6)        | 26.2 (6)        | -2.5 (5)        | -3.1 (5)        | -0.2 (5)        |
| O3S_3 | 28.2 (7)        | 20.5 (6)        | 26.2 (6)        | -2.5 (5)        | -3.1 (5)        | -0.2 (5)        |
| C1S_3 | 27 (3)          | 22 (4)          | 17 (3)          | 0 (2)           | 1.5 (14)        | -2 (3)          |
| C2S_3 | 29 (2)          | 33.6 (14)       | 24 (3)          | 3.1 (14)        | -2 (2)          | -0.9 (17)       |
| C3S_3 | 28 (2)          | 31 (2)          | 26 (3)          | 1.4 (16)        | -5 (2)          | -0.6 (17)       |
| O1_3  | 32.6 (10)       | 20.1 (9)        | 30.5 (9)        | -6.7 (8)        | 0.7 (8)         | -2.6 (8)        |
| O2_3  | 28.2 (7)        | 20.5 (6)        | 26.2 (6)        | -2.5 (5)        | -3.1 (5)        | -0.2 (5)        |
| O3_3  | 28.2 (7)        | 20.5 (6)        | 26.2 (6)        | -2.5 (5)        | -3.1 (5)        | -0.2 (5)        |
| C1_3  | 27 (3)          | 22 (4)          | 17 (3)          | 0 (2)           | 1.5 (14)        | -2 (3)          |
| C2_3  | 29 (2)          | 33.6 (14)       | 24 (3)          | 3.1 (14)        | -2 (2)          | -0.9 (17)       |
| C3_3  | 28 (2)          | 31 (2)          | 26 (3)          | 1.4 (16)        | -5 (2)          | -0.6 (17)       |

**Table S22. Bond Lengths for 4c<sub>2</sub>.**

| Atom | Atom  | Length/ $\text{\AA}$ | Atom | Atom              | Length/ $\text{\AA}$ |
|------|-------|----------------------|------|-------------------|----------------------|
| O1_4 | C1_4  | 1.429 (2)            | N1_5 | C9_5              | 1.435 (2)            |
| O1_4 | C27_4 | 1.372 (2)            | N2_5 | N5_5 <sup>2</sup> | 1.3888 (19)          |
| O2_4 | C5_4  | 1.430 (2)            | N2_5 | C6_5              | 1.414 (2)            |
| O2_4 | C21_4 | 1.367 (2)            | N3_5 | C6_5              | 1.369 (2)            |
| O3_4 | C6_4  | 1.202 (2)            | N3_5 | C7_5              | 1.391 (2)            |
| O4_4 | C7_4  | 1.214 (2)            | N3_5 | C8_5              | 1.461 (2)            |
| O5_4 | C16_4 | 1.210 (2)            | N4_5 | N5_5              | 1.4328 (19)          |
| O6_4 | C15_4 | 1.205 (2)            | N4_5 | C16_5             | 1.372 (2)            |
| N1_4 | N2_4  | 1.4380 (19)          | N4_5 | C18_5             | 1.431 (2)            |
| N1_4 | C7_4  | 1.366 (2)            | N5_5 | C15_5             | 1.416 (2)            |

**Table S22. Bond Lengths for 4c<sub>2</sub>.**

| <b>Atom</b> | <b>Atom</b>       | <b>Length/Å</b> | <b>Atom</b> | <b>Atom</b> | <b>Length/Å</b> |
|-------------|-------------------|-----------------|-------------|-------------|-----------------|
| N1_4        | C9_4              | 1.437(2)        | N6_5        | C15_5       | 1.365(2)        |
| N2_4        | N5_4 <sup>1</sup> | 1.3863(19)      | N6_5        | C16_5       | 1.390(2)        |
| N2_4        | C6_4              | 1.415(2)        | N6_5        | C17_5       | 1.458(2)        |
| N3_4        | C6_4              | 1.369(2)        | C1_5        | C2_5        | 1.511(2)        |
| N3_4        | C7_4              | 1.395(2)        | C2_5        | C3_5        | 1.526(2)        |
| N3_4        | C8_4              | 1.459(2)        | C3_5        | C4_5        | 1.525(2)        |
| N4_4        | N5_4              | 1.4333(19)      | C4_5        | C5_5        | 1.505(2)        |
| N4_4        | C16_4             | 1.376(2)        | C9_5        | C10_5       | 1.399(2)        |
| N4_4        | C18_4             | 1.428(2)        | C9_5        | C13_5       | 1.393(2)        |
| N5_4        | C15_4             | 1.414(2)        | C10_5       | C11_5       | 1.388(2)        |
| N6_4        | C15_4             | 1.366(2)        | C10_5       | C14_5       | 1.503(2)        |
| N6_4        | C16_4             | 1.394(2)        | C11_5       | C27_5       | 1.386(2)        |
| N6_4        | C17_4             | 1.458(2)        | C12_5       | C13_5       | 1.391(2)        |
| C1_4        | C2_4              | 1.512(2)        | C12_5       | C27_5       | 1.394(2)        |
| C2_4        | C3_4              | 1.519(2)        | C13_5       | C26_5       | 1.506(2)        |
| C3_4        | C4_4              | 1.526(2)        | C18_5       | C19_5       | 1.399(2)        |
| C4_4        | C5_4              | 1.510(2)        | C18_5       | C23_5       | 1.398(2)        |
| C9_4        | C10_4             | 1.401(2)        | C19_5       | C20_5       | 1.395(2)        |
| C9_4        | C13_4             | 1.393(2)        | C19_5       | C24_5       | 1.503(2)        |
| C10_4       | C11_4             | 1.388(2)        | C20_5       | C21_5       | 1.391(2)        |
| C10_4       | C14_4             | 1.504(2)        | C21_5       | C22_5       | 1.391(2)        |
| C11_4       | C27_4             | 1.387(2)        | C22_5       | C23_5       | 1.388(2)        |
| C12_4       | C13_4             | 1.395(2)        | C23_5       | C25_5       | 1.504(2)        |
| C12_4       | C27_4             | 1.395(2)        | O1S_1       | C1S_1       | 1.197(2)        |
| C13_4       | C26_4             | 1.508(2)        | O2S_1       | C1S_1       | 1.328(2)        |
| C18_4       | C19_4             | 1.395(2)        | O2S_1       | C2S_1       | 1.447(2)        |
| C18_4       | C23_4             | 1.399(2)        | O3S_1       | C1S_1       | 1.328(2)        |
| C19_4       | C20_4             | 1.397(2)        | O3S_1       | C3S_1       | 1.442(2)        |
| C19_4       | C24_4             | 1.507(2)        | O1S_2       | C1S_2       | 1.198(2)        |
| C20_4       | C21_4             | 1.391(2)        | O2S_2       | C1S_2       | 1.334(2)        |
| C21_4       | C22_4             | 1.393(2)        | O2S_2       | C2S_2       | 1.446(2)        |
| C22_4       | C23_4             | 1.383(2)        | O3S_2       | C1S_2       | 1.329(2)        |
| C23_4       | C25_4             | 1.507(2)        | O3S_2       | C3S_2       | 1.446(3)        |
| O1_5        | C1_5              | 1.429(2)        | O1S_3       | C1S_3       | 1.204(14)       |
| O1_5        | C27_5             | 1.3705(19)      | O2S_3       | C1S_3       | 1.334(14)       |
| O2_5        | C5_5              | 1.431(2)        | O2S_3       | C2S_3       | 1.441(13)       |
| O2_5        | C21_5             | 1.371(2)        | O3S_3       | C1S_3       | 1.335(14)       |
| O3_5        | C6_5              | 1.204(2)        | O3S_3       | C3S_3       | 1.442(13)       |
| O4_5        | C7_5              | 1.212(2)        | O1_3        | C1_3        | 1.202(13)       |
| O5_5        | C16_5             | 1.215(2)        | O2_3        | C1_3        | 1.332(13)       |

**Table S22. Bond Lengths for 4c<sub>2</sub>.**

| Atom | Atom  | Length/Å   | Atom | Atom | Length/Å  |
|------|-------|------------|------|------|-----------|
| O6_5 | C15_5 | 1.206(2)   | O2_3 | C2_3 | 1.433(16) |
| N1_5 | N2_5  | 1.4397(19) | O3_3 | C1_3 | 1.336(12) |
| N1_5 | C7_5  | 1.376(2)   | O3_3 | C3_3 | 1.445(15) |

<sup>1</sup>-X,<sub>1</sub>-Y,<sub>1</sub>-Z; <sup>2</sup>1-X,<sub>1</sub>-Y,-Z**Table S23. Bond Angles for 4c<sub>2</sub>.**

| Atom              | Atom | Atom  | Angle/°    | Atom              | Atom  | Atom  | Angle/°    |
|-------------------|------|-------|------------|-------------------|-------|-------|------------|
| C27_4             | O1_4 | C1_4  | 117.62(13) | C7_5              | N3_5  | C8_5  | 124.62(14) |
| C21_4             | O2_4 | C5_4  | 117.21(13) | C16_5             | N4_5  | N5_5  | 107.87(13) |
| C7_4              | N1_4 | N2_4  | 107.89(13) | C16_5             | N4_5  | C18_5 | 125.82(14) |
| C7_4              | N1_4 | C9_4  | 126.12(14) | C18_5             | N4_5  | N5_5  | 119.97(13) |
| C9_4              | N1_4 | N2_4  | 118.55(13) | N2_5 <sup>2</sup> | N5_5  | N4_5  | 113.57(12) |
| N5_4 <sup>1</sup> | N2_4 | N1_4  | 113.22(12) | N2_5 <sup>2</sup> | N5_5  | C15_5 | 118.98(13) |
| N5_4 <sup>1</sup> | N2_4 | C6_4  | 119.62(13) | C15_5             | N5_5  | N4_5  | 106.45(12) |
| C6_4              | N2_4 | N1_4  | 106.79(13) | C15_5             | N6_5  | C16_5 | 111.84(13) |
| C6_4              | N3_4 | C7_4  | 111.84(14) | C15_5             | N6_5  | C17_5 | 123.47(14) |
| C6_4              | N3_4 | C8_4  | 123.46(14) | C16_5             | N6_5  | C17_5 | 124.66(14) |
| C7_4              | N3_4 | C8_4  | 124.70(14) | O1_5              | C1_5  | C2_5  | 108.33(14) |
| C16_4             | N4_4 | N5_4  | 107.54(13) | C1_5              | C2_5  | C3_5  | 110.68(14) |
| C16_4             | N4_4 | C18_4 | 124.94(14) | C4_5              | C3_5  | C2_5  | 113.33(14) |
| C18_4             | N4_4 | N5_4  | 118.91(13) | C5_5              | C4_5  | C3_5  | 111.20(14) |
| N2_4 <sup>1</sup> | N5_4 | N4_4  | 114.17(12) | O2_5              | C5_5  | C4_5  | 107.87(14) |
| N2_4 <sup>1</sup> | N5_4 | C15_4 | 120.52(13) | O3_5              | C6_5  | N2_5  | 125.57(15) |
| C15_4             | N5_4 | N4_4  | 106.86(12) | O3_5              | C6_5  | N3_5  | 129.15(15) |
| C15_4             | N6_4 | C16_4 | 112.17(13) | N3_5              | C6_5  | N2_5  | 105.25(13) |
| C15_4             | N6_4 | C17_4 | 123.40(14) | O4_5              | C7_5  | N1_5  | 127.29(15) |
| C16_4             | N6_4 | C17_4 | 124.37(14) | O4_5              | C7_5  | N3_5  | 126.66(15) |
| O1_4              | C1_4 | C2_4  | 108.43(14) | N1_5              | C7_5  | N3_5  | 106.04(14) |
| C1_4              | C2_4 | C3_4  | 110.81(14) | C10_5             | C9_5  | N1_5  | 117.92(14) |
| C2_4              | C3_4 | C4_4  | 113.39(14) | C13_5             | C9_5  | N1_5  | 119.81(14) |
| C5_4              | C4_4 | C3_4  | 110.76(14) | C13_5             | C9_5  | C10_5 | 122.21(15) |
| O2_4              | C5_4 | C4_4  | 108.26(14) | C9_5              | C10_5 | C14_5 | 121.85(15) |
| O3_4              | C6_4 | N2_4  | 125.59(15) | C11_5             | C10_5 | C9_5  | 117.65(15) |
| O3_4              | C6_4 | N3_4  | 129.03(15) | C11_5             | C10_5 | C14_5 | 120.48(15) |
| N3_4              | C6_4 | N2_4  | 105.35(13) | C27_5             | C11_5 | C10_5 | 121.21(15) |
| O4_4              | C7_4 | N1_4  | 127.45(15) | C13_5             | C12_5 | C27_5 | 119.96(16) |
| O4_4              | C7_4 | N3_4  | 126.20(16) | C9_5              | C13_5 | C26_5 | 120.71(15) |
| N1_4              | C7_4 | N3_4  | 106.34(14) | C12_5             | C13_5 | C9_5  | 118.68(15) |

**Table S23. Bond Angles for 4c<sub>2</sub>.**

| <b>Atom Atom Atom</b>       | <b>Angle/°</b> | <b>Atom Atom Atom</b> | <b>Angle/°</b> |
|-----------------------------|----------------|-----------------------|----------------|
| C10_4 C9_4 N1_4             | 117.51 (15)    | C12_5 C13_5 C26_5     | 120.61 (15)    |
| C13_4 C9_4 N1_4             | 120.02 (15)    | O6_5 C15_5 N5_5       | 124.89 (15)    |
| C13_4 C9_4 C10_4            | 122.47 (15)    | O6_5 C15_5 N6_5       | 129.74 (15)    |
| C9_4 C10_4 C14_4            | 121.94 (15)    | N6_5 C15_5 N5_5       | 105.36 (13)    |
| C11_4 C10_4 C9_4            | 117.63 (16)    | O5_5 C16_5 N4_5       | 127.22 (15)    |
| C11_4 C10_4 C14_4           | 120.42 (16)    | O5_5 C16_5 N6_5       | 126.51 (15)    |
| C27_4 C11_4 C10_4           | 121.15 (16)    | N4_5 C16_5 N6_5       | 106.27 (14)    |
| C27_4 C12_4 C13_4           | 120.00 (16)    | C19_5 C18_5 N4_5      | 120.28 (15)    |
| C9_4 C13_4 C12_4            | 118.41 (16)    | C23_5 C18_5 N4_5      | 117.41 (15)    |
| C9_4 C13_4 C26_4            | 121.26 (15)    | C23_5 C18_5 C19_5     | 122.31 (15)    |
| C12_4 C13_4 C26_4           | 120.33 (16)    | C18_5 C19_5 C24_5     | 121.23 (15)    |
| O6_4 C15_4 N5_4             | 125.53 (15)    | C20_5 C19_5 C18_5     | 118.34 (16)    |
| O6_4 C15_4 N6_4             | 129.61 (15)    | C20_5 C19_5 C24_5     | 120.43 (15)    |
| N6_4 C15_4 N5_4             | 104.85 (14)    | C21_5 C20_5 C19_5     | 120.12 (16)    |
| O5_4 C16_4 N4_4             | 127.03 (15)    | O2_5 C21_5 C20_5      | 124.67 (15)    |
| O5_4 C16_4 N6_4             | 127.09 (15)    | O2_5 C21_5 C22_5      | 114.93 (15)    |
| N4_4 C16_4 N6_4             | 105.88 (14)    | C20_5 C21_5 C22_5     | 120.40 (15)    |
| C19_4 C18_4 N4_4            | 120.15 (15)    | C23_5 C22_5 C21_5     | 120.97 (16)    |
| C19_4 C18_4 C23_4           | 122.08 (15)    | C18_5 C23_5 C25_5     | 122.29 (15)    |
| C23_4 C18_4 N4_4            | 117.77 (14)    | C22_5 C23_5 C18_5     | 117.87 (15)    |
| C18_4 C19_4 C20_4           | 118.59 (16)    | C22_5 C23_5 C25_5     | 119.84 (15)    |
| C18_4 C19_4 C24_4           | 121.00 (15)    | O1_5 C27_5 C11_5      | 115.84 (15)    |
| C20_4 C19_4 C24_4           | 120.40 (15)    | O1_5 C27_5 C12_5      | 124.01 (15)    |
| C21_4 C20_4 C19_4           | 119.83 (16)    | C11_5 C27_5 C12_5     | 120.14 (15)    |
| O2_4 C21_4 C20_4            | 124.30 (15)    | C1S_1 O2S_1 C2S_1     | 114.33 (15)    |
| O2_4 C21_4 C22_4            | 115.19 (15)    | C1S_1 O3S_1 C3S_1     | 115.06 (15)    |
| C20_4 C21_4 C22_4           | 120.50 (16)    | O1S_1 C1S_1 O2S_1     | 126.05 (19)    |
| C23_4 C22_4 C21_4           | 120.77 (16)    | O1S_1 C1S_1 O3S_1     | 126.03 (19)    |
| C18_4 C23_4 C25_4           | 121.27 (15)    | O2S_1 C1S_1 O3S_1     | 107.92 (15)    |
| C22_4 C23_4 C18_4           | 118.18 (15)    | C1S_2 O2S_2 C2S_2     | 114.62 (15)    |
| C22_4 C23_4 C25_4           | 120.54 (15)    | C1S_2 O3S_2 C3S_2     | 114.94 (16)    |
| O1_4 C27_4 C11_4            | 115.52 (15)    | O1S_2 C1S_2 O2S_2     | 125.90 (19)    |
| O1_4 C27_4 C12_4            | 124.16 (16)    | O1S_2 C1S_2 O3S_2     | 126.69 (19)    |
| C11_4 C27_4 C12_4           | 120.31 (16)    | O3S_2 C1S_2 O2S_2     | 107.40 (16)    |
| C27_5 O1_5 C1_5             | 117.16 (13)    | C1S_3 O2S_3 C2S_3     | 115.4 (11)     |
| C21_5 O2_5 C5_5             | 118.02 (13)    | C1S_3 O3S_3 C3S_3     | 114.3 (10)     |
| C7_5 N1_5 N2_5              | 107.62 (12)    | O1S_3 C1S_3 O2S_3     | 125.9 (13)     |
| C7_5 N1_5 C9_5              | 125.13 (14)    | O1S_3 C1S_3 O3S_3     | 126.6 (12)     |
| C9_5 N1_5 N2_5              | 117.21 (13)    | O2S_3 C1S_3 O3S_3     | 107.1 (10)     |
| N5_5 <sup>2</sup> N2_5 N1_5 | 112.98 (12)    | C1_3 O2_3 C2_3        | 114.9 (9)      |

**Table S23. Bond Angles for 4c<sub>2</sub>.**

| Atom              | Atom | Atom | Angle/°     | Atom | Atom | Atom | Angle/°    |
|-------------------|------|------|-------------|------|------|------|------------|
| N5_5 <sup>2</sup> | N2_5 | C6_5 | 119.49 (13) | C1_3 | O3_3 | C3_3 | 114.3 (8)  |
| C6_5              | N2_5 | N1_5 | 106.78 (12) | O1_3 | C1_3 | O2_3 | 126.5 (11) |
| C6_5              | N3_5 | C7_5 | 112.22 (13) | O1_3 | C1_3 | O3_3 | 126.1 (11) |
| C6_5              | N3_5 | C8_5 | 123.15 (14) | O2_3 | C1_3 | O3_3 | 107.1 (9)  |

<sup>1</sup>-X,1-Y,1-Z; <sup>2</sup>1-X,1-Y,-Z**Table S24. Torsion Angles for 4c<sub>2</sub>.**

| A                 | B     | C     | D     | Angle/°     | A                 | B     | C     | D     | Angle/°     |
|-------------------|-------|-------|-------|-------------|-------------------|-------|-------|-------|-------------|
| O1_4              | C1_4  | C2_4  | C3_4  | 174.18 (14) | N2_5              | N1_5  | C7_5  | O4_5  | 169.90 (16) |
| O2_4              | C21_4 | C22_4 | C23_4 | 176.54 (15) | N2_5              | N1_5  | C7_5  | N3_5  | 10.95 (17)  |
| N1_4              | N2_4  | C6_4  | O3_4  | 170.59 (16) | N2_5              | N1_5  | C9_5  | C10_5 | 106.00 (17) |
| N1_4              | N2_4  | C6_4  | N3_4  | 11.43 (17)  | N2_5              | N1_5  | C9_5  | C13_5 | 71.24 (19)  |
| N1_4              | C9_4  | C10_4 | C11_4 | 178.37 (15) | N2_5 <sup>2</sup> | N5_5  | C15_5 | O6_5  | 36.9 (2)    |
| N1_4              | C9_4  | C10_4 | C14_4 | -1.2 (2)    | N2_5 <sup>2</sup> | N5_5  | C15_5 | N6_5  | 143.84 (14) |
| N1_4              | C9_4  | C13_4 | C12_4 | 177.36 (15) | N4_5              | N5_5  | C15_5 | O6_5  | 166.69 (15) |
| N1_4              | C9_4  | C13_4 | C26_4 | 3.4 (2)     | N4_5              | N5_5  | C15_5 | N6_5  | -14.04 (16) |
| N2_4              | N1_4  | C7_4  | O4_4  | 170.29 (16) | N4_5              | C18_5 | C19_5 | C20_5 | 179.87 (15) |
| N2_4              | N1_4  | C7_4  | N3_4  | 10.58 (17)  | N4_5              | C18_5 | C19_5 | C24_5 | -0.6 (2)    |
| N2_4              | N1_4  | C9_4  | C10_4 | 105.46 (18) | N4_5              | C18_5 | C23_5 | C22_5 | 179.41 (15) |
| N2_4              | N1_4  | C9_4  | C13_4 | 73.4 (2)    | N4_5              | C18_5 | C23_5 | C25_5 | -0.7 (2)    |
| N2_4 <sup>1</sup> | N5_4  | C15_4 | O6_4  | 33.5 (2)    | N5_5 <sup>2</sup> | N2_5  | C6_5  | O3_5  | -39.5 (2)   |
| N2_4 <sup>1</sup> | N5_4  | C15_4 | N6_4  | 147.91 (14) | N5_5 <sup>2</sup> | N2_5  | C6_5  | N3_5  | 142.38 (14) |
| N4_4              | N5_4  | C15_4 | O6_4  | 165.96 (15) | N5_5              | N4_5  | C16_5 | O5_5  | 170.51 (16) |
| N4_4              | N5_4  | C15_4 | N6_4  | -15.44 (16) | N5_5              | N4_5  | C16_5 | N6_5  | -9.60 (16)  |
| N4_4              | C18_4 | C19_4 | C20_4 | 179.29 (15) | N5_5              | N4_5  | C18_5 | C19_5 | -76.6 (2)   |
| N4_4              | C18_4 | C19_4 | C24_4 | -1.5 (3)    | N5_5              | N4_5  | C18_5 | C23_5 | 103.29 (18) |
| N4_4              | C18_4 | C23_4 | C22_4 | 179.75 (15) | C1_5              | O1_5  | C27_5 | C11_5 | 171.93 (15) |
| N4_4              | C18_4 | C23_4 | C25_4 | -1.6 (2)    | C1_5              | O1_5  | C27_5 | C12_5 | -7.3 (2)    |
| N5_4 <sup>1</sup> | N2_4  | C6_4  | O3_4  | -40.4 (2)   | C1_5              | C2_5  | C3_5  | C4_5  | 178.01 (14) |
| N5_4 <sup>1</sup> | N2_4  | C6_4  | N3_4  | 141.61 (14) | C2_5              | C3_5  | C4_5  | C5_5  | 179.38 (14) |
| N5_4              | N4_4  | C16_4 | O5_4  | 168.83 (16) | C3_5              | C4_5  | C5_5  | O2_5  | 175.08 (14) |
| N5_4              | N4_4  | C16_4 | N6_4  | -10.67 (16) | C5_5              | O2_5  | C21_5 | C20_5 | -7.6 (2)    |



**Table S24. Torsion Angles for 4c<sub>2</sub>.**

| A     | B     | C     | D                 | Angle/°    | A     | B     | C     | D                 | Angle/°    |
|-------|-------|-------|-------------------|------------|-------|-------|-------|-------------------|------------|
| N5_4  | N4_4  | C18_4 | C19_4             | -77.6(2)   | C5_5  | O2_5  | C21_5 | C22_5             | 172.51(15) |
| N5_4  | N4_4  | C18_4 | C23_4             | 102.52(18) | C6_5  | N3_5  | C7_5  | O4_5              | 177.80(16) |
| C1_4  | O1_4  | C27_4 | C11_4             | 175.25(15) | C6_5  | N3_5  | C7_5  | N1_5              | -3.05(18)  |
| C1_4  | O1_4  | C27_4 | C12_4             | 4.6(3)     | C7_5  | N1_5  | N2_5  | N5_5 <sup>2</sup> | 148.28(13) |
| C1_4  | C2_4  | C3_4  | C4_4              | 179.65(15) | C7_5  | N1_5  | N2_5  | C6_5              | -14.93(17) |
| C2_4  | C3_4  | C4_4  | C5_4              | 179.27(15) | C7_5  | N1_5  | C9_5  | C10_5             | 112.92(18) |
| C3_4  | C4_4  | C5_4  | O2_4              | 179.42(14) | C7_5  | N1_5  | C9_5  | C13_5             | -69.8(2)   |
| C5_4  | O2_4  | C21_4 | C20_4             | 2.7(3)     | C7_5  | N3_5  | C6_5  | O3_5              | 175.72(17) |
| C5_4  | O2_4  | C21_4 | C22_4             | 176.67(16) | C7_5  | N3_5  | C6_5  | N2_5              | -6.22(18)  |
| C6_4  | N3_4  | C7_4  | O4_4              | 177.42(17) | C8_5  | N3_5  | C6_5  | O3_5              | -2.7(3)    |
| C6_4  | N3_4  | C7_4  | N1_4              | -3.44(19)  | C8_5  | N3_5  | C6_5  | N2_5              | 175.38(15) |
| C7_4  | N1_4  | N2_4  | N5_4 <sup>1</sup> | 147.65(14) | C8_5  | N3_5  | C7_5  | O4_5              | -3.8(3)    |
| C7_4  | N1_4  | N2_4  | C6_4              | -13.93(17) | C8_5  | N3_5  | C7_5  | N1_5              | 175.31(15) |
| C7_4  | N1_4  | C9_4  | C10_4             | 108.43(19) | C9_5  | N1_5  | N2_5  | N5_5 <sup>2</sup> | 64.34(17)  |
| C7_4  | N1_4  | C9_4  | C13_4             | -72.7(2)   | C9_5  | N1_5  | N2_5  | C6_5              | 162.31(14) |
| C7_4  | N3_4  | C6_4  | O3_4              | 176.89(17) | C9_5  | N1_5  | C7_5  | O4_5              | -25.8(3)   |
| C7_4  | N3_4  | C6_4  | N2_4              | -5.22(18)  | C9_5  | N1_5  | C7_5  | N3_5              | 155.07(15) |
| C8_4  | N3_4  | C6_4  | O3_4              | -3.5(3)    | C9_5  | C10_5 | C11_5 | C27_5             | -1.8(3)    |
| C8_4  | N3_4  | C6_4  | N2_4              | 174.41(15) | C10_5 | C9_5  | C13_5 | C12_5             | 2.4(3)     |
| C8_4  | N3_4  | C7_4  | O4_4              | -2.2(3)    | C10_5 | C9_5  | C13_5 | C26_5             | 177.73(16) |
| C8_4  | N3_4  | C7_4  | N1_4              | 176.94(15) | C10_5 | C11_5 | C27_5 | O1_5              | 175.08(15) |
| C9_4  | N1_4  | N2_4  | N5_4 <sup>1</sup> | 60.61(18)  | C10_5 | C11_5 | C27_5 | C12_5             | 4.1(3)     |
| C9_4  | N1_4  | N2_4  | C6_4              | 165.67(14) | C13_5 | C9_5  | C10_5 | C11_5             | -1.4(2)    |
| C9_4  | N1_4  | C7_4  | O4_4              | -21.3(3)   | C13_5 | C9_5  | C10_5 | C14_5             | 179.70(16) |
| C9_4  | N1_4  | C7_4  | N3_4              | 159.59(15) | C13_5 | C12_5 | C27_5 | O1_5              | 175.98(16) |
| C9_4  | C10_4 | C11_4 | C27_4             | -1.0(3)    | C13_5 | C12_5 | C27_5 | C11_5             | -3.2(3)    |
| C10_4 | C9_4  | C13_4 | C12_4             | 1.4(3)     | C14_5 | C10_5 | C11_5 | C27_5             | 176.45(16) |
| C10_4 | C9_4  | C13_4 | C26_4             | 177.82(16) | C15_5 | N6_5  | C16_5 | O5_5              | 179.48(16) |
| C10_4 | C11_4 | C27_4 | O1_4              | 178.74(16) | C15_5 | N6_5  | C16_5 | N4_5              | 0.64(18)   |
| C10_4 | C11_4 | C27_4 | C12_4             | 1.4(3)     | C16_5 | N4_5  | N5_5  | N2_5 <sup>2</sup> | 147.73(13) |

**Table S24. Torsion Angles for 4c<sub>2</sub>.**

| A     | B     | C     | D                 | Angle/°     | A     | B     | C     | D                 | Angle/°     |
|-------|-------|-------|-------------------|-------------|-------|-------|-------|-------------------|-------------|
| C13_4 | C9_4  | C10_4 | C11_4             | -0.4 (3)    | C16_5 | N4_5  | N5_5  | C15_5             | 14.89 (16)  |
| C13_4 | C9_4  | C10_4 | C14_4             | 179.98 (16) | C16_5 | N4_5  | C18_5 | C19_5             | 71.9 (2)    |
| C13_4 | C12_4 | C27_4 | O1_4              | 179.77 (16) | C16_5 | N4_5  | C18_5 | C23_5             | 108.17 (19) |
| C13_4 | C12_4 | C27_4 | C11_4             | -0.3 (3)    | C16_5 | N6_5  | C15_5 | O6_5              | 172.20 (17) |
| C14_4 | C10_4 | C11_4 | C27_4             | 178.62 (16) | C16_5 | N6_5  | C15_5 | N5_5              | 8.58 (17)   |
| C15_4 | N6_4  | C16_4 | O5_4              | 178.61 (16) | C17_5 | N6_5  | C15_5 | O6_5              | 6.0 (3)     |
| C15_4 | N6_4  | C16_4 | N4_4              | 0.89 (18)   | C17_5 | N6_5  | C15_5 | N5_5              | 173.19 (14) |
| C16_4 | N4_4  | N5_4  | N2_4 <sup>1</sup> | 152.38 (13) | C17_5 | N6_5  | C16_5 | O5_5              | 2.3 (3)     |
| C16_4 | N4_4  | N5_4  | C15_4             | 16.53 (16)  | C17_5 | N6_5  | C16_5 | N4_5              | 177.56 (14) |
| C16_4 | N4_4  | C18_4 | C19_4             | 66.1 (2)    | C18_5 | N4_5  | N5_5  | N2_5 <sup>2</sup> | -58.67 (18) |
| C16_4 | N4_4  | C18_4 | C23_4             | 113.77 (18) | C18_5 | N4_5  | N5_5  | C15_5             | 168.49 (14) |
| C16_4 | N6_4  | C15_4 | O6_4              | 172.20 (17) | C18_5 | N4_5  | C16_5 | O5_5              | 18.9 (3)    |
| C16_4 | N6_4  | C15_4 | N5_4              | 9.28 (17)   | C18_5 | N4_5  | C16_5 | N6_5              | 161.24 (15) |
| C17_4 | N6_4  | C15_4 | O6_4              | 4.9 (3)     | C18_5 | C19_5 | C20_5 | C21_5             | 0.2 (2)     |
| C17_4 | N6_4  | C15_4 | N5_4              | 173.58 (14) | C19_5 | C18_5 | C23_5 | C22_5             | -0.6 (3)    |
| C17_4 | N6_4  | C16_4 | O5_4              | 4.3 (3)     | C19_5 | C18_5 | C23_5 | C25_5             | 179.21 (16) |
| C17_4 | N6_4  | C16_4 | N4_4              | 176.22 (14) | C19_5 | C20_5 | C21_5 | O2_5              | 180.00 (16) |
| C18_4 | N4_4  | N5_4  | N2_4 <sup>1</sup> | -58.21 (18) | C19_5 | C20_5 | C21_5 | C22_5             | -0.1 (3)    |
| C18_4 | N4_4  | N5_4  | C15_4             | 165.94 (14) | C20_5 | C21_5 | C22_5 | C23_5             | -0.4 (3)    |
| C18_4 | N4_4  | C16_4 | O5_4              | 21.7 (3)    | C21_5 | O2_5  | C5_5  | C4_5              | 172.32 (14) |
| C18_4 | N4_4  | C16_4 | N6_4              | 157.76 (14) | C21_5 | C22_5 | C23_5 | C18_5             | 0.7 (3)     |
| C18_4 | C19_4 | C20_4 | C21_4             | 0.0 (3)     | C21_5 | C22_5 | C23_5 | C25_5             | 179.12 (16) |
| C19_4 | C18_4 | C23_4 | C22_4             | -0.1 (3)    | C23_5 | C18_5 | C19_5 | C20_5             | 0.2 (3)     |
| C19_4 | C18_4 | C23_4 | C25_4             | 178.47 (16) | C23_5 | C18_5 | C19_5 | C24_5             | 179.49 (16) |
| C19_4 | C20_4 | C21_4 | O2_4              | 177.50 (16) | C24_5 | C19_5 | C20_5 | C21_5             | 179.12 (16) |
| C19_4 | C20_4 | C21_4 | C22_4             | 1.9 (3)     | C27_5 | O1_5  | C1_5  | C2_5              | 168.34 (14) |
| C20_4 | C21_4 | C22_4 | C23_4             | -2.9 (3)    | C27_5 | C12_5 | C13_5 | C9_5              | 0.0 (3)     |
| C21_4 | O2_4  | C5_4  | C4_4              | 171.42 (14) | C27_5 | C12_5 | C13_5 | C26_5             | 179.92 (16) |

**Table S24. Torsion Angles for 4c<sub>2</sub>.**

| A     | B     | C     | D     | Angle/°     | A     | B     | C     | D     | Angle/°     |
|-------|-------|-------|-------|-------------|-------|-------|-------|-------|-------------|
| C21_4 | C22_4 | C23_4 | C18_4 | 2.0 (3)     | C2S_1 | O2S_1 | C1S_1 | O1S_1 | -1.3 (3)    |
| C21_4 | C22_4 | C23_4 | C25_4 | 176.64 (16) | C2S_1 | O2S_1 | C1S_1 | O3S_1 | 179.21 (15) |
| C23_4 | C18_4 | C19_4 | C20_4 | -0.8 (3)    | C3S_1 | O3S_1 | C1S_1 | O1S_1 | -1.2 (3)    |
| C23_4 | C18_4 | C19_4 | C24_4 | 178.38 (16) | C3S_1 | O3S_1 | C1S_1 | O2S_1 | 178.35 (15) |
| C24_4 | C19_4 | C20_4 | C21_4 | 179.26 (17) | C2S_2 | O2S_2 | C1S_2 | O1S_2 | 3.0 (3)     |
| C27_4 | O1_4  | C1_4  | C2_4  | 175.30 (14) | C2S_2 | O2S_2 | C1S_2 | O3S_2 | 177.72 (15) |
| C27_4 | C12_4 | C13_4 | C9_4  | -1.0 (3)    | C3S_2 | O3S_2 | C1S_2 | O1S_2 | 2.0 (3)     |
| C27_4 | C12_4 | C13_4 | C26_4 | 178.23 (16) | C3S_2 | O3S_2 | C1S_2 | O2S_2 | 177.33 (15) |
| O1_5  | C1_5  | C2_5  | C3_5  | 178.85 (14) | C2S_3 | O2S_3 | C1S_3 | O1S_3 | 10 (9)      |
| O2_5  | C21_5 | C22_5 | C23_5 | 179.53 (15) | C2S_3 | O2S_3 | C1S_3 | O3S_3 | -176 (3)    |
| N1_5  | N2_5  | C6_5  | O3_5  | 169.20 (16) | C3S_3 | O3S_3 | C1S_3 | O1S_3 | 0 (9)       |
| N1_5  | N2_5  | C6_5  | N3_5  | 12.65 (16)  | C3S_3 | O3S_3 | C1S_3 | O2S_3 | -173 (3)    |
| N1_5  | C9_5  | C10_5 | C11_5 | 175.71 (15) | C2_3  | O2_3  | C1_3  | O1_3  | -4 (8)      |
| N1_5  | C9_5  | C10_5 | C14_5 | -2.5 (2)    | C2_3  | O2_3  | C1_3  | O3_3  | 171 (3)     |
| N1_5  | C9_5  | C13_5 | C12_5 | 174.76 (15) | C3_3  | O3_3  | C1_3  | O1_3  | -8 (8)      |
| N1_5  | C9_5  | C13_5 | C26_5 | 5.2 (2)     | C3_3  | O3_3  | C1_3  | O2_3  | 177 (3)     |

<sup>1</sup>-X,1-Y,1-Z; <sup>2</sup>1-X,1-Y,-Z

**Table S25. Hydrogen Atom Coordinates ( $\text{\AA} \times 10^4$ ) and Isotropic Displacement Parameters ( $\text{\AA}^2 \times 10^3$ ) for 4c<sub>2</sub>.**

| Atom  | x       | y       | z       | U(eq) |
|-------|---------|---------|---------|-------|
| H1A_4 | 2866.36 | 5506.92 | 5438.55 | 27    |
| H1B_4 | 1441.65 | 4817.7  | 5443.03 | 27    |
| H2A_4 | 2663.91 | 3739.34 | 5174.3  | 27    |
| H2B_4 | 4174.62 | 4347.35 | 5186.42 | 27    |
| H3A_4 | 2939.33 | 5599    | 4967.43 | 28    |
| H3B_4 | 1436.63 | 4987.84 | 4954.2  | 28    |
| H4A_4 | 4148.08 | 4489.24 | 4693.43 | 27    |
| H4B_4 | 2631.76 | 3887.44 | 4678.26 | 27    |
| H5A_4 | 1397.07 | 5176.22 | 4474.79 | 31    |
| H5B_4 | 2924.26 | 5772.08 | 4487.99 | 31    |
| H8A_4 | 1459.09 | 7610.91 | 7186.26 | 41    |
| H8B_4 | 3224.88 | 7533.79 | 7139.3  | 41    |

**Table S25. Hydrogen Atom Coordinates ( $\text{\AA}\times 10^4$ ) and Isotropic Displacement Parameters ( $\text{\AA}^2\times 10^3$ ) for  $4c_2$ .**

| Atom   | <i>x</i> | <i>y</i> | <i>z</i> | U(eq) |
|--------|----------|----------|----------|-------|
| H8C_4  | 2449.1   | 6900.26  | 7355.73  | 41    |
| H11_4  | 4335.86  | 3703.34  | 6046.97  | 29    |
| H12_4  | 1526.93  | 5768.92  | 5806.58  | 28    |
| H14A_4 | 4528.86  | 4385.44  | 6697.88  | 38    |
| H14B_4 | 5242.67  | 3690.08  | 6489.45  | 38    |
| H14C_4 | 3660.22  | 3445.56  | 6616.11  | 38    |
| H17A_4 | 25.92    | 7434.13  | 2630.02  | 35    |
| H17B_4 | 862.92   | 8090.01  | 2836.54  | 35    |
| H17C_4 | -928.46  | 8044.01  | 2829.59  | 35    |
| H20_4  | 1234.41  | 6174.98  | 4149.35  | 28    |
| H22_4  | 3555.53  | 4079.13  | 3803.42  | 27    |
| H24A_4 | 568.95   | 7551.53  | 3704.8   | 42    |
| H24B_4 | -590.81  | 7071.11  | 3898.41  | 42    |
| H24C_4 | -755.06  | 6904.5   | 3594.15  | 42    |
| H25A_4 | 1997.04  | 3825.01  | 3281.33  | 39    |
| H25B_4 | 3733.55  | 4026.77  | 3337.1   | 39    |
| H25C_4 | 2775.02  | 4742.9   | 3164.06  | 39    |
| H26A_4 | 112.5    | 6414.47  | 6380.64  | 40    |
| H26B_4 | 410.84   | 6818.38  | 6097.46  | 40    |
| H26C_4 | 1513.99  | 7090.63  | 6330.6   | 40    |
| H1A_5  | 8487.09  | 5831.56  | 438.91   | 27    |
| H1B_5  | 7044.09  | 5224.23  | 517.54   | 27    |
| H2A_5  | 7942.73  | 3937.65  | 272.14   | 26    |
| H2B_5  | 9403.7   | 4529.68  | 196.96   | 26    |
| H3A_5  | 6405.39  | 5025.03  | 45.96    | 26    |
| H3B_5  | 7842.8   | 5644.96  | -22.92   | 26    |
| H4A_5  | 8771.65  | 4394.59  | -282.93  | 26    |
| H4B_5  | 7320.4   | 3781.55  | -215.58  | 26    |
| H5A_5  | 5767.03  | 4856.99  | -432.59  | 28    |
| H5B_5  | 7167.51  | 5539.87  | -483.79  | 28    |
| H8A_5  | 6391.11  | 7911.64  | 2206.06  | 41    |
| H8B_5  | 8178.41  | 7900.8   | 2183.88  | 41    |
| H8C_5  | 7361.45  | 7216.11  | 2383.47  | 41    |
| H11_5  | 10011.29 | 4126.96  | 1088.67  | 25    |
| H12_5  | 7387.59  | 6263.1   | 835.33   | 26    |
| H14A_5 | 10015.82 | 4719.24  | 1740.97  | 36    |
| H14B_5 | 10650.55 | 3979.99  | 1536.22  | 36    |
| H14C_5 | 9015.72  | 3837.72  | 1654.71  | 36    |
| H17A_5 | 5174.94  | 6997.58  | -2355.04 | 35    |

**Table S25. Hydrogen Atom Coordinates ( $\text{\AA}\times 10^4$ ) and Isotropic Displacement Parameters ( $\text{\AA}^2\times 10^3$ ) for  $4c_2$ .**

| Atom   | <i>x</i> | <i>y</i> | <i>z</i> | U(eq) |
|--------|----------|----------|----------|-------|
| H17B_5 | 5944.67  | 7653     | -2140.84 | 35    |
| H17C_5 | 4162.64  | 7658.95  | -2177.4  | 35    |
| H20_5  | 5397.23  | 5787.82  | -805.19  | 26    |
| H22_5  | 7906.7   | 3711.12  | -1117.64 | 28    |
| H24A_5 | 4869.02  | 7127.3   | -1304.3  | 39    |
| H24B_5 | 3900.19  | 6781.83  | -1063.69 | 39    |
| H24C_5 | 3476.18  | 6435.67  | -1348.83 | 39    |
| H25A_5 | 6744.94  | 3431.61  | -1651.73 | 38    |
| H25B_5 | 8419.78  | 3744.47  | -1580.27 | 38    |
| H25C_5 | 7415.66  | 4384.91  | -1767.55 | 38    |
| H26A_5 | 5703.51  | 6829.74  | 1386.83  | 41    |
| H26B_5 | 6225.92  | 7306.61  | 1122.71  | 41    |
| H26C_5 | 7161.47  | 7484.65  | 1382.78  | 41    |
| H2SA_1 | -1648.13 | 8162.76  | 4287.57  | 56    |
| H2SB_1 | -1261.41 | 7086.85  | 4349.79  | 56    |
| H2SC_1 | 54.6     | 7848.72  | 4333.93  | 56    |
| H3SA_1 | 1425.74  | 7180.23  | 5201.47  | 60    |
| H3SB_1 | 38.66    | 6482.48  | 5240.3   | 60    |
| H3SC_1 | 182.45   | 7411.57  | 5413.05  | 60    |
| H2SA_2 | 5899.54  | 3131.58  | 4190.25  | 59    |
| H2SB_2 | 4248.41  | 2927.15  | 4294.59  | 59    |
| H2SC_2 | 5421.65  | 2083.01  | 4266.03  | 59    |
| H3SA_2 | 5320.23  | 1514.83  | 5189.54  | 63    |
| H3SB_2 | 3930.59  | 2226.13  | 5190.52  | 63    |
| H3SC_2 | 5402.08  | 2459.71  | 5356.87  | 63    |
| H2SA_3 | 5369.78  | 4942.94  | 2545.05  | 44    |
| H2SB_3 | 4648.61  | 4378.66  | 2780.63  | 44    |
| H2SC_3 | 5512.39  | 5347.77  | 2832.28  | 44    |
| H3SA_3 | 481.99   | 5447.28  | 2136.94  | 42    |
| H3SB_3 | -712.44  | 5805.24  | 2343.64  | 42    |
| H3SC_3 | -57.47   | 4759.36  | 2362.26  | 42    |
| H2A_3  | 5318.66  | 5649.85  | 2611.71  | 44    |
| H2B_3  | 5874.02  | 4607.74  | 2679.4   | 44    |
| H2C_3  | 4710.13  | 5130.18  | 2863.94  | 44    |
| H3A_3  | 543.16   | 5914.96  | 2193.11  | 42    |
| H3B_3  | -113.9   | 5520.66  | 2458.37  | 42    |
| H3C_3  | -377.55  | 4949.13  | 2195.93  | 42    |

**Table S26. Atomic Occupancy for 4c2.**

| Atom   | Occupancy   | Atom   | Occupancy   | Atom   | Occupancy   |
|--------|-------------|--------|-------------|--------|-------------|
| O1S_3  | 0.4628 (12) | O2S_3  | 0.4628 (12) | O3S_3  | 0.4628 (12) |
| C1S_3  | 0.4628 (12) | C2S_3  | 0.4628 (12) | H2SA_3 | 0.4628 (12) |
| H2SB_3 | 0.4628 (12) | H2SC_3 | 0.4628 (12) | C3S_3  | 0.4628 (12) |
| H3SA_3 | 0.4628 (12) | H3SB_3 | 0.4628 (12) | H3SC_3 | 0.4628 (12) |
| O1_3   | 0.5372 (12) | O2_3   | 0.5372 (12) | O3_3   | 0.5372 (12) |
| C1_3   | 0.5372 (12) | C2_3   | 0.5372 (12) | H2A_3  | 0.5372 (12) |
| H2B_3  | 0.5372 (12) | H2C_3  | 0.5372 (12) | C3_3   | 0.5372 (12) |
| H3A_3  | 0.5372 (12) | H3B_3  | 0.5372 (12) | H3C_3  | 0.5372 (12) |

### Experimental

Single crystals were recrystallized from a solution of Compound **4c2** (GB2022) dissolved in dimethylcarbonate. A suitable crystal with dimensions  $0.27 \times 0.21 \times 0.10 \text{ mm}^3$  was selected and mounted on a loop with paratone oil on a XtaLAB Synergy, Dualflex, HyPix diffractometer. The crystal was kept at 100 K during data collection. Using *Olex2* [1], the structure was solved with the *olex2.solve* [2] structure solution program and refined with *SHELXL* [3] via full matrix least squares minimization on  $F^2$ .

### Crystal structure determination of 4c2

**Crystal Data** for  $\text{C}_{63}\text{H}_{82}\text{N}_{12}\text{O}_{21}$  ( $M = 1343.40 \text{ g/mol}$ ): monoclinic, space group  $P2_1/c$  (no. 14),  $a = 8.92534(8) \text{ \AA}$ ,  $b = 14.21670(12) \text{ \AA}$ ,  $c = 51.8332(4) \text{ \AA}$ ,  $\beta = 90.4433(8)^\circ$ ,  $V = 6576.87(9) \text{ \AA}^3$ ,  $Z = 4$ ,  $T = 100.0(9) \text{ K}$ ,  $\mu(\text{Cu K}\alpha) = 0.862 \text{ mm}^{-1}$ ,  $D_{\text{calc}} = 1.357 \text{ g/cm}^3$ , 58388 reflections measured ( $6.446^\circ \leq 2\theta \leq 146.38^\circ$ ), 12479 unique ( $R_{\text{int}} = 0.0609$ ,  $R_{\text{sigma}} = 0.0455$ ) which were used in all calculations. The final  $R_1$  was 0.0448 ( $I > 2\sigma(I)$ ) and  $wR_2$  was 0.1150 (all data).

### Refinement model description

Number of restraints - 30, number of constraints - unknown.

#### Details:

##### 1. Uiso/Uanis restraints and constraints

Uanis(C3S\_3) = Uanis(C3\_3)

Uanis(O2\_3) = Uanis(O3\_3)

Uanis(C1S\_3) = Uanis(C1\_3)

Uanis(C2S\_3) = Uanis(C2\_3)

Uanis(O1S\_3) = Uanis(O1\_3)

Uanis(O3S\_3) = Uanis(O3\_3)

Uanis(O2\_3) = Uanis(O2S\_3)

##### 2. Same fragment restrains

##### 3. Others

Sof(O1S) = Sof(O2S) = Sof(O3S) = Sof(C1S) = Sof(C2S) = Sof(H2SA) = Sof(H2SB) = Sof(H2SC) =

Sof(C3S) = Sof(H3SA) = Sof(H3SB) = Sof(H3SC) = 1 - FVAR(1)

Sof(O1) = Sof(O2) = Sof(O3) = Sof(C1) = Sof(C2) = Sof(H2A) = Sof(H2B) = Sof(H2C) = Sof(C3) =

Sof(H3A) = Sof(H3B) = Sof(H3C) = FVAR(1)

##### 4.a Secondary CH2 refined with riding coordinates:

C1(H1A,H1B), C2(H2A,H2B), C3(H3A,H3B), C4(H4A,H4B), C5(H5A,H5B), C1(H1A,H1B), C2(H2A,H2B), C3(H3A,H3B), C4(H4A,H4B), C5(H5A,H5B)

##### 4.b Aromatic/amide H refined with riding coordinates:

C11(H11), C12(H12), C20(H20), C22(H22), C11(H11), C12(H12), C20(H20), C22(H22)

##### 4.c Idealised Me refined as rotating group:

C8(H8A,H8B,H8C), C14(H14A,H14B,H14C), C17(H17A,H17B,H17C), C24(H24A,H24B,H24C), C25(H25A,H25B,H25C), C26(H26A,H26B,H26C), C8(H8A,H8B,H8C), C14(H14A,H14B,H14C), C17(H17A,H17B,H17C), C24(H24A,H24B,H24C), C25(H25A,H25B,H25C), C26(H26A,H26B,H26C), C2S(H2SA,H2SB,H2SC), C3S(H3SA,H3SB,H3SC), C2S(H2SA,H2SB,H2SC), C3S(H3SA,H3SB,H3SC), C2S(H2SA,H2SB,H2SC), C3S(H3SA,H3SB,H3SC), C2(H2A,H2B,H2C), C3(H3A,H3B,H3C)

This report has been created with Olex2, compiled on 2023.02.24 svn.rf166f9f3 for OlexSys. Please [let us know](#) if there are any errors or if you would like to have additional features.

## References

1. Dolomanov, O. V.; Bourhis, L. J.; Gildea, R. J.; Howard, J. A. K.; Puschmann, H. J. OLEX2: A Complete Structure Solution, Refinement and Analysis Program. *Appl. Cryst.* **2009**, *42*, 339-341. <https://doi.org/10.1107/S0021889808042726>
2. Bourhis, L. J.; Dolomanov, O. V.; Gildea, R. J.; Howard, J. A. K.; Puschmann, H. The Anatomy of a Comprehensive Constrained, Restrained Refinement Program for the Modern Computing Environment – Olex2 Dissected. *Acta Cryst.* **2015**, *A71*, 59-75. <https://doi.org/10.1107/S2053273314022207>
3. Sheldrick, G. M. SHELXT- Integrated Space-Group and Crystal-Structure Determination. *Acta Cryst.* **2015**, *C71*, 3-8. <https://doi.org/10.1107/S2053273314026370>
4. Macrae, C. F.; Sovago, I.; Cottrell, S. J.; Galek, P. T. A.; McCabe, P.; Pidcock, E.; Platings, M.; Shields, G. P.; Stevens, J. S.; Towler, M.; Wood, P. A. Mercury 4.0: From Visualization to Analysis, Design and Prediction. *J. Appl. Cryst.* **2020**, *53*, 226-235. <https://doi.org/10.1107/S1600576719014092>
